# Supplementary material for: Base-controlled dearomative [3 + 2] cycloadditions between 3-nitro-indoles and fumaric acid amide esters
Source: Royal Society of Chemistry journal article supplement (doi:10.1039/d2ob00296e), 2022-01-01

## Supporting Information

### Base-controlled Dearomative [3 + 2] cycloadditions between 3-nitro-indoles and fumaric acid amide esters

Heng-Zhi Tian<sup>a</sup>, Sheng-Feng Wu<sup>a</sup>, Guo-Wei Zhuang<sup>a</sup>, Guo-Qiang Lin<sup>ab</sup> and Xing-Wen Sun<sup>\*ab</sup>

<sup>a</sup> Department of Chemistry, Fudan University, Shanghai 200433, China

<sup>b</sup> Key Laboratory of Synthetic Chemistry of Natural Substances, Shanghai Institute of Organic Chemistry, University of Chinese Academy of Sciences, Chinese Academy of Sciences, 345 Lingling Road, Shanghai 200032, China

E-mail: sunxingwen@fudan.edu.cn

| List of contents                                  | page |
|---------------------------------------------------|------|
| 1. General information                            | S1   |
| 2. General procedure                              | S1   |
| 3. Table S1-S3                                    | S5   |
| 3. Analytical data of the products                | S6   |
| 4. <sup>1</sup> H and <sup>13</sup> C NMR spectra | S27  |
| 5. X-ray data of the product                      | S86  |
| 6. Theoretical calculation of atomic charges      | S91  |

## 1. General Information

All reagents and all solvents were obtained from commercial suppliers and used without further purification except as indicated below. The silica gel (300-400 mesh) was used for column chromatography and TLC inspections were on silica gel GF 254 plates (0.25 mm layer thickness). NMR spectra were all recorded on a Bruker AM400 (400 MHz) spectrometer. Chemical shifts are reported in  $\delta$  ppm referenced to an internal SiMe<sub>4</sub> standard for <sup>1</sup>H NMR and chloroform-d ( $\delta$  77.16) for <sup>13</sup>C NMR. Enantioselectivities were determined by high-performance liquid chromatography (HPLC) with an Agilent-1260 intelligent uv/vis detector ( $\lambda$  = 214 nm, 220nm or 254 nm) and a Daicel IB. Optical rotations were measured in CHCl<sub>3</sub> on a Pekin-Elmer 241MC automatic polarimeter. HRESIMS were recorded on an Agilent 6210 TOF LC/MS equipped with an electrospray ionization (ESI) probe operating in positive or negative ion mode.

## 2. General procedure

### General procedure A: the synthesis of 3-Nitro-indoles 1a–o:

**3-Nitro-indoles 1** were prepared according to the following representative methods reported in the literature.<sup>1</sup>

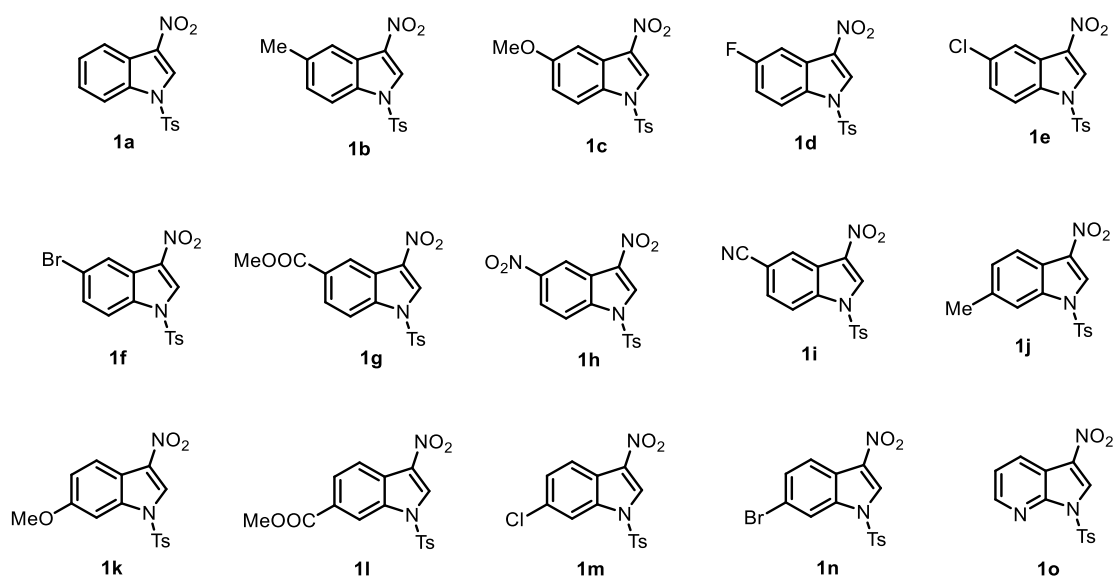

### General procedure B: the synthesis of fumaric acid amide esters 2a-e:

$\alpha$ ,  $\beta$ -Unsaturated acrylamide **2** were prepared according to the following representative procedure.<sup>2</sup>

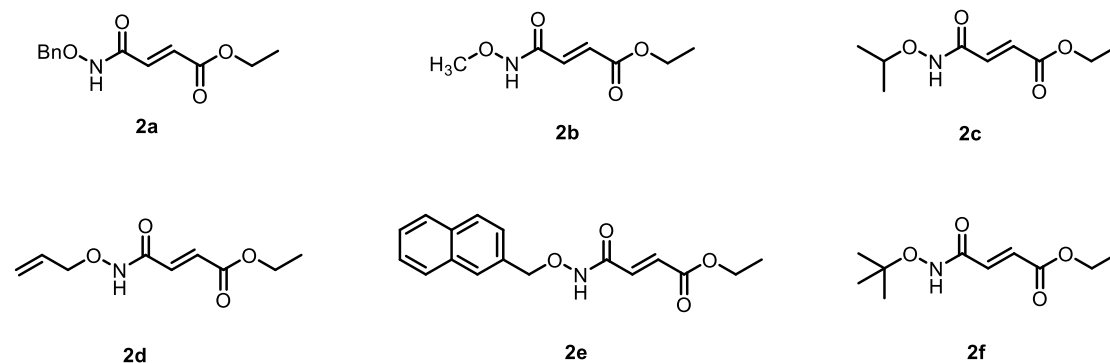

### General procedure C: the synthesis of Pyrrolo[2,3-b]indole 4:

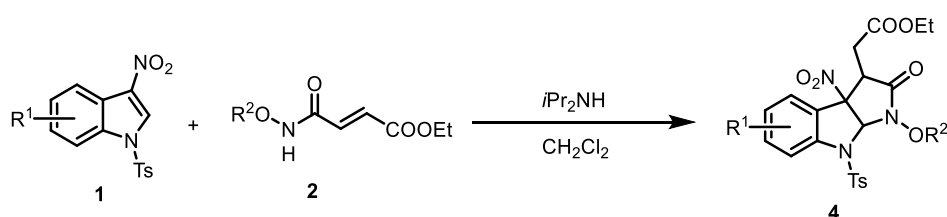

A solution of 3-Nitro-indoles **1** (0.24 mmol), fumaric acid amide esters **2** (0.20 mmol) and *i*Pr<sub>2</sub>NH (0.01 mmol) in CH<sub>2</sub>Cl<sub>2</sub> (0.5 mL) was stirred at room temperature (25 °C) for 48 h. The mixture was concentrated under reduced pressure and the residue was purified via flash chromatograph on silica gel (EtOAc /Petrol Ether = 1/4, v/v as eluent) to afford the desired product **4**. When the *i*-Pr<sub>2</sub>NH was replaced by catalyst **S1**, 50% ee **4a** could be obtained.

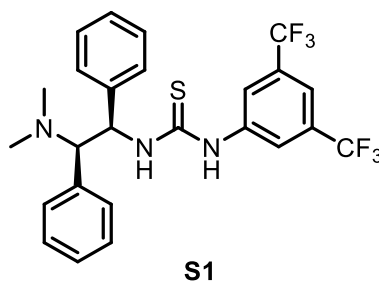

### General procedure D: the synthesis of Pyrrolo[2,3-b]indole 5:

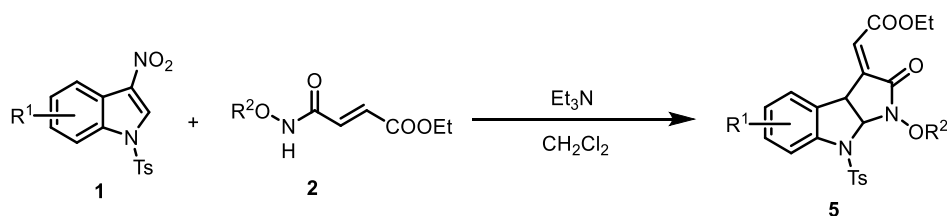

A solution of 3-Nitro-indoles **1** (0.24 mmol), fumaric acid amide esters **2** (0.20 mmol) and Et<sub>3</sub>N (0.30 mmol) in CH<sub>2</sub>Cl<sub>2</sub> (0.5 mL) was stirred at room temperature (25 °C) for 48 h. The mixture was concentrated under reduced pressure and the residue was purified via flash chromatograph on silica gel (EtOAc/Petrol Ether = 1/4, v/v as eluent) to afford the desired

product **5**.

### General procedure E: the synthesis of Pyrrolo[2,3-b]indole **6**:

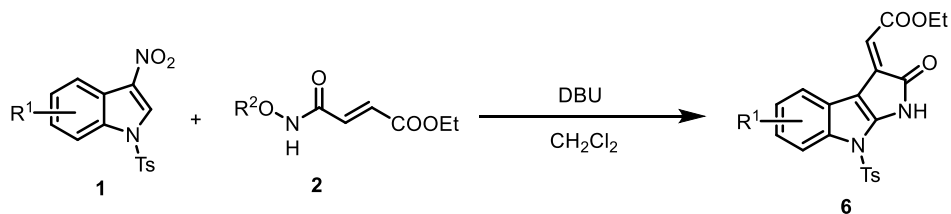

A solution of 3-Nitro-indoles **1** (0.24 mmol) and fumaric acid amide esters **2** (0.20 mmol) was dissolved in CH<sub>2</sub>Cl<sub>2</sub> (2.0 mL), DBU (0.8 mmol) in CH<sub>2</sub>Cl<sub>2</sub> (2.0 mL) was added dropwise to the mixture at room temperature (25 °C) during 20 min, keeping stirring for 3-12 h after dropping finished. The mixture was purified via flash chromatograph on silica gel (pure DCM), the collected solution was concentrated under reduced pressure to afford the desired product **6**.

### References:

1. Rivinoja, D. J.; Gee, Y. S.; Gardiner, M. G.; Ryan, J. H.; Hyland, C. J. P. *ACS Catal.* **2017**, 7, 1053.
2. Yokosaka, T.; Hamajima, A.; Nemoto, t.; Hamada, Y. *Tetrahedron Lett.* **2012**, 53, 1245.

**Table S1. Optimization of the reaction condition <sup>a</sup>**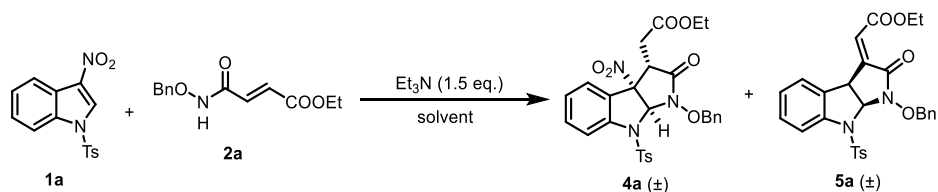

| Entry | Solvent                  | Compound <b>4</b> <sup>b</sup> | Compound <b>5</b> <sup>b</sup> (dr) <sup>c</sup> |
|-------|--------------------------|--------------------------------|--------------------------------------------------|
| 1     | $\text{CH}_2\text{Cl}_2$ | trace                          | 77(>20:1)                                        |
| 2     | $\text{CHCl}_3$          | trace                          | 75(>20:1)                                        |
| 3     | MeCN                     | 9                              | 67(>20:1)                                        |
| 4     | EA                       | 19                             | 60(>20:1)                                        |
| 5     | toluene                  | trace                          | 72(>20:1)                                        |
| 6     | acetone                  | 9                              | 68(>20:1)                                        |
| 7     | THF                      | trace                          | 76(>20:1)                                        |

<sup>a</sup>Typical reaction conditions: **1a** (0.11 mmol), **2a** (0.10 mmol) in solvent (0.5 mL), at 25 °C for 48 h.

<sup>b</sup>Determined by <sup>1</sup>H NMR. <sup>c</sup>Determined by <sup>1</sup>H NMR analysis of the crude reaction mixture before purification.

**Table S2. Optimization of the reaction condition <sup>a</sup>**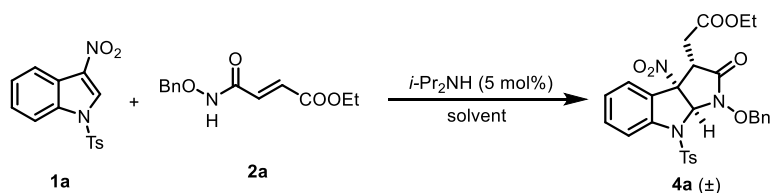

| Entry | Solvent                  | dr <sup>b</sup> | Yield <sup>c</sup> (%) |
|-------|--------------------------|-----------------|------------------------|
| 1     | $\text{CH}_2\text{Cl}_2$ | 18:1            | 90                     |
| 2     | $\text{CHCl}_3$          | 17:1            | 88                     |
| 3     | THF                      | 5:1             | 60                     |
| 4     | $\text{CH}_3\text{CN}$   | 5:1             | 70                     |
| 5     | toluene                  | 15:1            | 77                     |
| 6     | EA                       | 16:1            | 60                     |
| 7     | DCE                      | 8:1             | 82                     |
| 8     | actone                   | 5:1             | 50                     |

<sup>a</sup>Typical reaction conditions: **1a** (0.11 mmol), **2a** (0.10 mmol), in solvent (0.5 mL), at 25 °C for 48 h.

<sup>b</sup>Determined by <sup>1</sup>H-NMR analysis of the crude reaction mixture before purification. <sup>c</sup>Determined by <sup>1</sup>H NMR.

**Table S3. Optimization of the reaction solvent <sup>a</sup>**

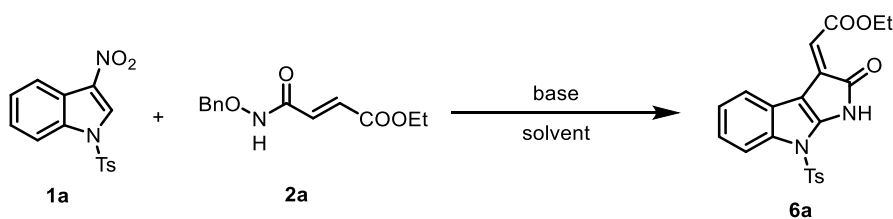

| Entry           | Base                           | Equiv. | Solvent                         | Yield <sup>b</sup> (%) |
|-----------------|--------------------------------|--------|---------------------------------|------------------------|
| 1               | DBU                            | 1.0    | CH <sub>2</sub> Cl <sub>2</sub> | 0                      |
| 2               | DBU                            | 1.2    | CH <sub>2</sub> Cl <sub>2</sub> | <5                     |
| 3               | DBU                            | 1.5    | CH <sub>2</sub> Cl <sub>2</sub> | 37                     |
| 4               | DBU                            | 2.0    | CH <sub>2</sub> Cl <sub>2</sub> | 53                     |
| 5               | DBU                            | 2.4    | CH <sub>2</sub> Cl <sub>2</sub> | 52                     |
| 6               | DBN                            | 2.0    | CH <sub>2</sub> Cl <sub>2</sub> | 40                     |
| 7               | DBU                            | 2.0    | CHCl <sub>3</sub>               | 50                     |
| 8               | DBU                            | 2.0    | THF                             | 48                     |
| 9               | DBU                            | 2.0    | CH <sub>3</sub> CN              | 34                     |
| 10              | DBU                            | 2.0    | toluene                         | 44                     |
| 11              | DBU                            | 2.0    | ethyl acetate                   | 44                     |
| 12              | DBU                            | 2.0    | DCE                             | <20                    |
| 12              | DBU                            | 2.0    | actone                          | 35                     |
| 13              | DBU                            | 2.0    | DMF                             | 50                     |
| 14              | K <sub>2</sub> CO <sub>3</sub> | 2.0    | DMF                             | <20                    |
| 15              | CH <sub>3</sub> ONa            | 2.0    | DMF                             | 52                     |
| 16              | <i>t</i> -BuOK                 | 2.0    | DMF                             | 44                     |
| 17 <sup>c</sup> | DBU                            | 2.0    | CH <sub>2</sub> Cl <sub>2</sub> | 50                     |

<sup>a</sup>Typical reaction conditions: **1a** (0.11 mmol), **2a** (0.10 mmol) in solvent (0.5 mL), at 25 °C for 1 h.

<sup>b</sup>Determined by <sup>1</sup>H NMR. <sup>c</sup>The reaction was at 0 °C for 1 h.

**Table S4. Optimization of the reaction condition <sup>a</sup>**

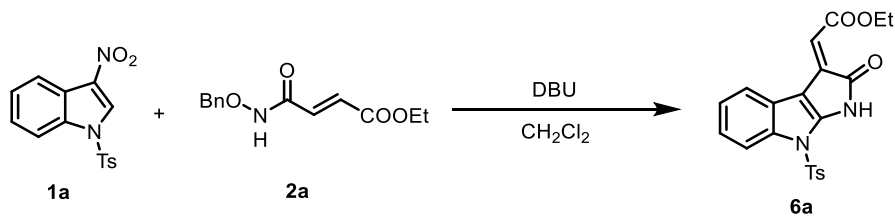

| Entry | Equiv. | 5a yield (%) | 6a yield (%) | Dropping time (min) |
|-------|--------|--------------|--------------|---------------------|
| 1     | 2.0    | 0            | 54           | 0                   |
| 2     | 2.0    | 20           | 58           | 10                  |

|           |     |     |    |    |
|-----------|-----|-----|----|----|
| <b>3</b>  | 2.5 | <10 | 64 | 10 |
| <b>4</b>  | 2.0 | 34  | 54 | 60 |
| <b>5</b>  | 2.5 | 24  | 60 | 60 |
| <b>6</b>  | 3.0 | 16  | 64 | 60 |
| <b>7</b>  | 3.0 | 0   | 68 | 20 |
| <b>8</b>  | 3.0 | 0   | 64 | 10 |
| <b>9</b>  | 4.0 | 0   | 72 | 60 |
| <b>10</b> | 4.0 | 0   | 70 | 30 |
| <b>11</b> | 4.0 | 0   | 70 | 20 |
| <b>12</b> | 4.0 | 0   | 62 | 10 |

<sup>a</sup>Typical reaction conditions: **1a** (0.11 mmol), **2a** (0.10 mmol) in CH<sub>2</sub>Cl<sub>2</sub> (1.0 mL), DBU in CH<sub>2</sub>Cl<sub>2</sub> (1.0 mL) was added dropwise to the mixture at 25 °C during 20 min, keeping stirring for 3 h after dripping finished. <sup>b</sup>Determined by <sup>1</sup>H-NMR.

### 3. Analytical data of the products

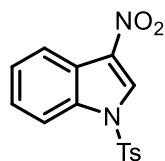

**1a**, <sup>1</sup>H NMR (400 MHz, CDCl<sub>3</sub>) δ 8.57 (s, 1H), 8.38 – 8.14 (m, 1H), 8.06 – 7.97 (m, 1H), 7.88 (d, *J* = 7.8 Hz, 2H), 7.50 – 7.42 (m, 2H), 7.33 (d, *J* = 7.8 Hz, 2H), 2.40 (s, 3H).

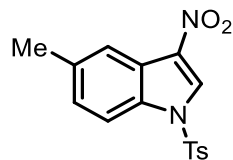

**1b**, <sup>1</sup>H NMR (400 MHz, CDCl<sub>3</sub>) δ 8.52 (s, 1H), 8.03 (s, 1H), 7.87 (d, *J* = 6.8 Hz, 3H), 7.41 – 7.28 (m, 3H), 2.48 (s, 3H), 2.40 (s, 3H).

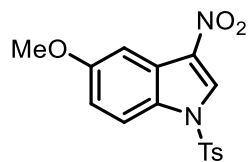

**1c**, <sup>1</sup>H NMR (400 MHz, CDCl<sub>3</sub>) δ 8.53 (s, 1H), 7.94 – 7.82 (m, 3H), 7.68 (d, *J* = 2.4 Hz, 1H), 7.40 – 7.25 (m, 2H), 7.08 (dd, *J* = 9.2, 2.4 Hz, 1H), 3.90 (s, 3H), 2.42 (s, 3H).

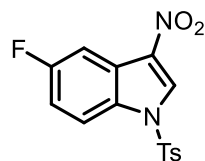

**1d**, <sup>1</sup>H NMR (400 MHz, CDCl<sub>3</sub>) δ 8.58 (s, 1H), 8.04 – 7.79 (m, 4H), 7.35 (d, *J* = 7.8 Hz, 2H), 7.20 (t, *J* = 9.0 Hz, 1H), 2.41 (s, 3H).

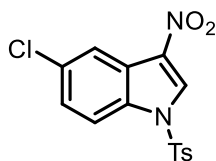

**1e**, <sup>1</sup>H NMR (400 MHz, CDCl<sub>3</sub>) δ 8.56 (s, 1H), 8.23 (s, 1H), 7.94 (d, *J* = 8.8 Hz, 1H), 7.87 (d, *J* = 8.0 Hz, 2H), 7.43 (d, *J* = 8.8 Hz, 1H), 7.35 (d, *J* = 7.0 Hz, 2H), 2.41 (s, 3H).

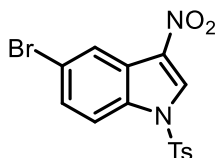

**1f**, <sup>1</sup>H NMR (400 MHz, CDCl<sub>3</sub>) δ 8.54 (s, 1H), 8.40 (s, 1H), 7.87 (t, *J* = 7.8 Hz, 3H), 7.57 (d, *J* = 8.9 Hz, 1H), 7.35 (d, *J* = 7.9 Hz, 2H), 2.41 (s, 3H).

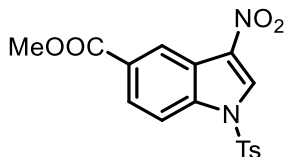

**1g**, <sup>1</sup>H NMR (400 MHz, CDCl<sub>3</sub>) δ 8.92 (s, 1H), 8.62 (s, 1H), 8.16 (d, *J* = 8.8 Hz, 1H), 8.06 (d, *J* = 8.8 Hz, 1H), 7.89 (d, *J* = 7.8 Hz, 2H), 7.35 (d, *J* = 7.8 Hz, 2H), 3.97 (s, 3H), 2.41 (s, 3H).

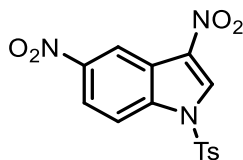

**1h**, <sup>1</sup>H NMR (400 MHz, CDCl<sub>3</sub>) δ 9.14 (s, 1H), 8.70 (s, 1H), 8.36 (d, *J* = 9.2 Hz, 1H), 8.16 (d, *J* = 9.2 Hz, 1H), 7.91 (d, *J* = 7.8 Hz, 2H), 7.39 (d, *J* = 7.9 Hz, 2H), 2.43 (s, 3H).

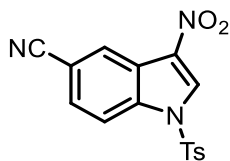

**1i**, <sup>1</sup>H NMR (400 MHz, CDCl<sub>3</sub>) δ 8.69 – 8.58 (m, 2H), 8.13 (d, *J* = 8.8 Hz, 1H), 7.90 (t, *J* = 7.8 Hz, 2H), 7.72 (d, *J* = 8.8 Hz, 1H), 7.38 (d, *J* = 7.8 Hz, 2H), 2.43 (s, 3H).

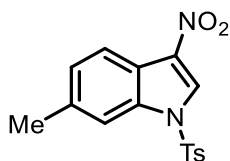

**1j**, <sup>1</sup>H NMR (400 MHz, CDCl<sub>3</sub>) δ 8.49 (s, 1H), 8.09 (d, *J* = 8.2 Hz, 1H), 7.88 (d, *J* = 7.8 Hz, 2H), 7.80 (s, 1H), 7.34 (d, *J* = 7.8 Hz, 2H), 7.29 (s, 1H), 2.52 (s, 3H), 2.41 (s, 3H).



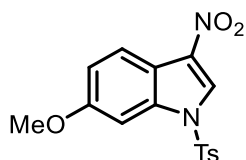

**1k**,  $^1\text{H NMR}$  (400 MHz,  $\text{CDCl}_3$ )  $\delta$  8.44 (s, 1H), 8.09 (d,  $J = 8.8$  Hz, 1H), 7.86 (d,  $J = 8.0$  Hz, 2H), 7.48 (s, 1H), 7.34 (d,  $J = 7.8$  Hz, 2H), 7.06 (d,  $J = 8.8$  Hz, 1H), 3.91 (s, 3H), 2.41 (s, 3H).

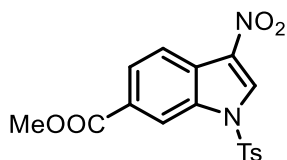

**1l**,  $^1\text{H NMR}$  (400 MHz,  $\text{CDCl}_3$ )  $\delta$  8.54 (s, 1H), 8.16 (dd,  $J = 8.4, 0.8$  Hz, 1H), 7.87 (d,  $J = 8.4$  Hz, 2H), 7.68 (dd,  $J = 7.6, 0.8$  Hz, 1H), 7.51 (dd,  $J = 8.4, 7.6$  Hz, 1H), 7.35 (d,  $J = 8.0$  Hz, 2H), 3.89 (d,  $J = 4.4$  Hz, 3H), 2.41 (s, 3H).

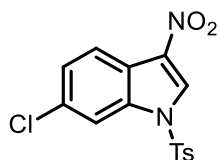

**1m**,  $^1\text{H NMR}$  (400 MHz,  $\text{CDCl}_3$ )  $\delta$  8.53 (s, 1H), 8.16 (d,  $J = 8.4$  Hz, 1H), 8.03 (s, 1H), 7.89 (d,  $J = 7.6$  Hz, 2H), 7.43 (d,  $J = 8.6$  Hz, 1H), 7.37 (d,  $J = 7.9$  Hz, 2H), 2.43 (s, 3H).

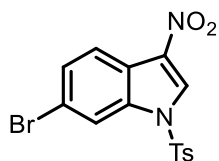

**1n**,  $^1\text{H NMR}$  (400 MHz,  $\text{CDCl}_3$ )  $\delta$  8.51 (s, 1H), 8.20 (s, 1H), 8.10 (d,  $J = 8.6$  Hz, 1H), 7.88 (d,  $J = 7.8$  Hz, 2H), 7.58 (d,  $J = 8.6$  Hz, 1H), 7.38 (d,  $J = 7.9$  Hz, 2H), 2.43 (s, 3H).

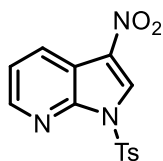

**1o**,  $^1\text{H NMR}$  (400 MHz,  $\text{CDCl}_3$ )  $\delta$  8.71 (s, 1H), 8.54 (dd,  $J = 13.6, 6.4$  Hz, 2H), 8.19 (d,  $J = 7.6$  Hz, 2H), 7.43 (dd,  $J = 7.6, 5.0$  Hz, 1H), 7.36 (d,  $J = 7.8$  Hz, 2H), 2.42 (s, 3H).

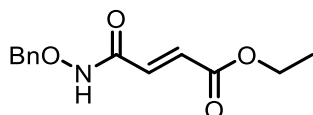

**2a**,  $^1\text{H NMR}$  (400 MHz,  $\text{CDCl}_3$ )  $\delta$  9.70 (s, 1H), 7.44 – 7.32 (m, 5H), 6.86 (s, 2H), 4.94 (s, 2H), 4.28 – 4.13 (m, 2H), 1.29 (t,  $J = 6.8$  Hz, 3H).

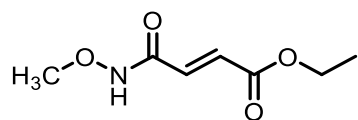

**2b**,  $^1\text{H NMR}$  (400 MHz,  $\text{CDCl}_3$ )  $\delta$  8.77 (s, 1H), 7.24 – 6.47 (m, 2H), 4.35 – 4.25 (m, 2H), 4.05 – 3.71 (m, 3H), 1.37 – 1.29 (m, 3H).

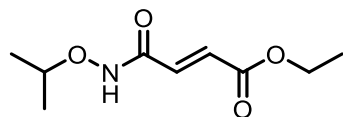

**2c**,  $^1\text{H NMR}$  (400 MHz,  $\text{CDCl}_3$ )  $\delta$  8.85 (s, 1H), 6.94 (dd,  $J = 15.6, 3.8$  Hz, 2H), 4.33 – 4.18 (m, 3H), 1.37 – 1.24 (m, 9H).

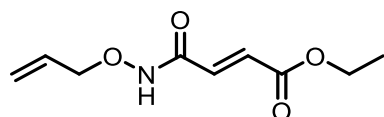

**2d**,  $^1\text{H NMR}$  (400 MHz,  $\text{CDCl}_3$ )  $\delta$  9.90 (s, 1H), 6.91 (d,  $J = 12.4$  Hz, 2H), 6.03 – 5.93 (m, 1H), 5.49 – 5.15 (m, 2H), 4.53 (dd,  $J = 62.0, 5.6$  Hz, 2H), 4.27 – 4.23 (m, 2H), 1.36 – 1.24 (m, 3H).

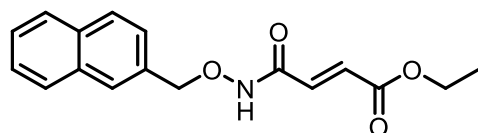

**2e**,  $^1\text{H NMR}$  (400 MHz,  $\text{CDCl}_3$ )  $\delta$  8.37 (s, 1H), 7.93 – 7.82 (m, 4H), 7.62 – 7.46 (m, 2H), 7.02 – 6.34 (m, 2H), 5.15 (s, 22H), 4.30 – 4.18 (m, 2H), 1.38 – 1.22 (m, 3H).

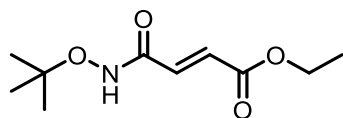

**2f**,  $^1\text{H NMR}$  (400 MHz,  $\text{CDCl}_3$ )  $\delta$  8.81 (s, 1H), 7.35 – 6.32 (m, 2H), 4.32 – 4.18 (m, 2H), 1.36 – 1.28 (m, 12H).

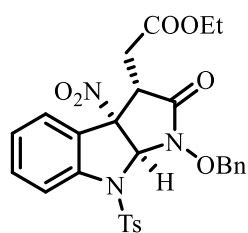

**4a**, white solid, m.p. = 158.8-160.9 °C. 101mg, 89% yield, 18:1 dr,  $^1\text{H NMR}$  (400 MHz,  $\text{CDCl}_3$ )  $\delta$  7.69 (d,  $J = 8.0$  Hz, 3H), 7.62 (t,  $J = 6.4$  Hz, 3H), 7.50 (t,  $J = 7.8$  Hz, 1H), 7.42 – 7.35 (m, 3H), 7.24 (t,  $J = 7.8$  Hz, 1H), 7.18 (d,  $J = 8.0$  Hz, 2H), 6.76 (s, 1H), 5.23 (dd,  $J = 25.4, 9.0$  Hz, 2H), 4.13 (q,  $J = 7.2$  Hz, 2H), 3.45 – 3.39 (m, 1H), 3.12 (dd,  $J = 18.2, 4.0$  Hz, 1H), 2.94 (dd,  $J = 18.2, 6.4$  Hz, 1H), 2.35 (s, 3H), 1.25 (t,  $J = 7.2$  Hz, 3H).  $^{13}\text{C NMR}$  (101 MHz,  $\text{CDCl}_3$ )  $\delta$  170.39, 165.12, 145.18, 140.62, 134.20, 133.72, 133.05, 130.30, 129.81, 120.10, 129.04, 128.41, 127.57, 126.38, 126.03, 117.38, 91.21, 80.35, 77.93, 61.69, 44.92, 33.24, 21.57, 13.98. HRMS (ESI) calcd for  $\text{C}_{28}\text{H}_{27}\text{N}_3\text{O}_8\text{S}$   $[\text{M}+\text{H}]^+$ : 566.1592. Found:

566.1597.

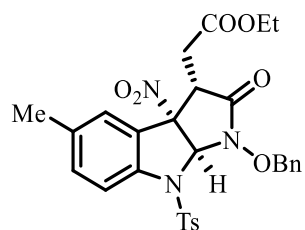

**4b**, white solid, m.p. = 153.0-155.1 °C. 100mg, 86% yield, 17:1 dr,  $^1\text{H}$  NMR (400 MHz,  $\text{CDCl}_3$ )  $\delta$  = 7.67 (d,  $J=8.4$ , 2H), 7.64 – 7.60 (m, 2H), 7.59 (d,  $J=8.4$ , 1H), 7.43 – 7.35 (m, 4H), 7.30 (dd,  $J=8.4$ , 1.2, 1H), 7.18 (d,  $J=8.0$ , 2H), 6.73 (s, 1H), 5.22 (dd,  $J=23.2$ , 9.2, 2H), 4.13 (q,  $J=7.2$ , 2H), 3.39 (dd,  $J=6.4$ , 4.0, 1H), 3.11 (dd,  $J=18.0$ , 4.0, 1H), 2.94 (dd,  $J=18.0$ , 6.4, 1H), 2.36 (s, 3H), 2.35 (s, 3H), 1.25 (t,  $J=7.2$ , 3H).  $^{13}\text{C}$  NMR (101 MHz,  $\text{CDCl}_3$ )  $\delta$  = 170.53, 165.30, 145.22, 138.41, 136.48, 134.35, 134.05, 133.91, 130.46, 129.94, 129.33, 129.19, 128.58, 127.74, 126.66, 117.43, 91.41, 80.77, 78.13, 61.83, 45.07, 33.42, 21.74, 21.21, 14.15. HRMS (ESI) calcd for  $\text{C}_{29}\text{H}_{29}\text{N}_3\text{O}_8\text{S}$   $[\text{M}+\text{H}]^+$ : 580.1748. Found: 580.1758.

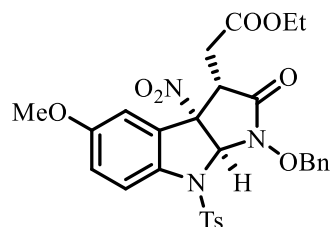

**4c**, white solid, m.p. = 129.1-131.8 °C. 97mg, 81% yield, 16:1 dr,  $^1\text{H}$  NMR (400 MHz,  $\text{CDCl}_3$ )  $\delta$  = 7.72 – 7.53 (m, 5H), 7.43 – 7.35 (m, 3H), 7.17 (d,  $J=8.4$ , 2H), 7.13 (d,  $J=2.4$ , 1H), 7.06 (dd,  $J=9.2$ , 2.8, 1H), 6.65 (s, 1H), 5.23 (q,  $J=8.8$ , 2H), 4.12 (q,  $J=7.2$ , 2H), 3.82 (s, 3H), 3.40 (dd,  $J=6.8$ , 4.0, 1H), 3.08 (dd,  $J=18.0$ , 4.0, 1H), 2.87 (dd,  $J=18.0$ , 6.8, 1H), 2.35 (s, 3H), 1.24 (t,  $J=7.2$ , 3H).  $^{13}\text{C}$  NMR (101 MHz,  $\text{CDCl}_3$ )  $\delta$  = 170.47, 165.23, 158.36, 145.26, 134.02, 133.93, 133.89, 130.47, 129.97, 129.22, 128.58, 127.69, 119.70, 119.07, 110.92, 91.55, 81.14, 78.25, 61.82, 56.02, 45.11, 33.40, 21.74, 14.15. HRMS (ESI) calcd for  $\text{C}_{29}\text{H}_{29}\text{N}_3\text{O}_9\text{S}$   $[\text{M}+\text{H}]^+$ : 596.1697. Found: 596.1698.

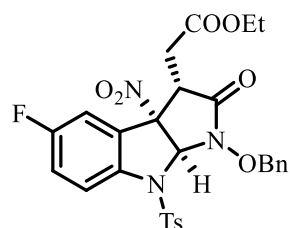

**4d**, white solid, m.p. = 154.3-157.1 °C. 106mg, 91% yield, 18:1 dr,  $^1\text{H}$  NMR (400 MHz,  $\text{CDCl}_3$ )  $\delta$  = 7.67 (dd,  $J=8.8$ , 4.4, 1H), 7.63 – 7.57 (m, 4H), 7.43 – 7.34 (m, 4H), 7.21 (m, 3H), 6.65 (s, 1H), 5.22 (q,  $J=9.2$ , 2H), 4.12 (q,  $J=7.2$ , 2H), 3.37 (dd,  $J=7.2$ , 4.0, 1H), 3.08 (dd,  $J=18.4$ , 4.0, 1H), 2.87 (dd,  $J=18.4$ , 7.2, 1H), 2.36 (s, 3H), 1.24 (t,  $J=7.2$ , 3H).  $^{13}\text{C}$  NMR (101 MHz,  $\text{CDCl}_3$ )  $\delta$  170.32, 164.90, 160.47( $J$  = 245.9), 145.47, 136.75, 133.68, 133.61, 130.58( $J$  = 8.6), 130.34, 129.95, 129.14, 128.46, 127.47, 120.38( $J$  = 23.5), 119.12( $J$  = 8.3), 113.88( $J$  = 25.3), 90.98, 81.02, 78.05, 61.79, 44.89, 33.18, 21.59, 13.98.  $^{19}\text{F}$  NMR (376 MHz,  $\text{CDCl}_3$ )  $\delta$  -113.9 (m). HRMS (ESI) calcd for  $\text{C}_{28}\text{H}_{26}\text{FN}_3\text{O}_8\text{S}$   $[\text{M}+\text{H}]^+$ : 584.1497. Found: 584.1499.

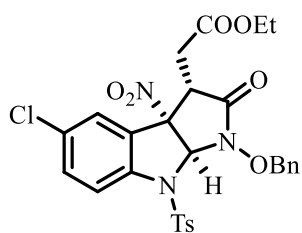

**4e**, pale yellow solid, m.p. = 98.9-101.3 °C. 101mg, 84% yield, 14:1 dr,  $^1\text{H}$  NMR (400 MHz,  $\text{CDCl}_3$ )  $\delta$  = 7.61 (m, 6H), 7.46 (dd,  $J=8.8, 2.4$ , 1H), 7.42 – 7.35 (m, 3H), 7.20 (d,  $J=8.0$ , 2H), 6.70 (s, 1H), 5.21 (dd,  $J=24.4, 9.2$ , 2H), 4.12 (q,  $J=7.2$ , 2H), 3.37 (dd,  $J=6.4, 4.0$ , 1H), 3.10 (dd,  $J=18.4, 4.0$ , 1H), 2.93 (dd,  $J=18.4, 6.4$ , 1H), 2.36 (s, 3H), 1.24 (t,  $J=7.2$ , 3H).  $^{13}\text{C}$  NMR (101 MHz,  $\text{CDCl}_3$ )  $\delta$  = 170.49, 165.04, 145.68, 139.46, 133.99, 133.77, 133.43, 131.66, 130.71, 130.49, 130.15, 129.29, 128.62, 127.67, 126.80, 118.73, 91.00, 80.87, 78.12, 61.96, 44.92, 33.34, 21.77, 14.14. HRMS (ESI) calcd for  $\text{C}_{28}\text{H}_{26}\text{ClN}_3\text{O}_8\text{S}$   $[\text{M}+\text{H}]^+$ : 600.1202. Found: 600.1201.

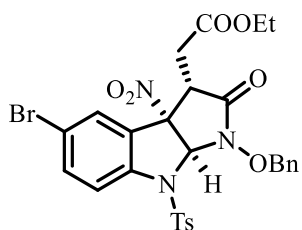

**4f**, yellow solid, m.p. = 128.8-132.6 °C. 103mg, 80% yield, 12:1 dr,  $^1\text{H}$  NMR (400 MHz,  $\text{CDCl}_3$ )  $\delta$  = 7.74 (d,  $J=1.6$ , 1H), 7.67 – 7.63 (m, 2H), 7.62 – 7.53 (m, 4H), 7.42 – 7.34 (m, 3H), 7.20 (d,  $J=8.0$ , 2H), 6.69 (s, 1H), 5.20 (dd,  $J=25.6, 8.8$ , 2H), 4.12 (q,  $J=7.2$ , 2H), 3.36 (dd,  $J=6.4, 4.0$ , 1H), 3.10 (dd,  $J=18.4, 4.0$ , 1H), 2.93 (dd,  $J=18.4, 6.4$ , 1H), 2.36 (s, 3H), 1.24 (t,  $J=7.2$ , 3H).  $^{13}\text{C}$  NMR (101 MHz,  $\text{CDCl}_3$ )  $\delta$  = 170.49, 165.03, 145.68, 139.96, 136.29, 134.01, 133.76, 131.00, 130.48, 130.15, 129.63, 129.28, 128.61, 127.68, 119.02, 118.82, 90.90, 80.75, 78.09, 61.96, 44.89, 33.33, 21.77, 14.14. HRMS (ESI) calcd for  $\text{C}_{28}\text{H}_{26}\text{BrN}_3\text{O}_8\text{S}$   $[\text{M}+\text{H}]^+$ : 644.0697. Found: 644.0692.

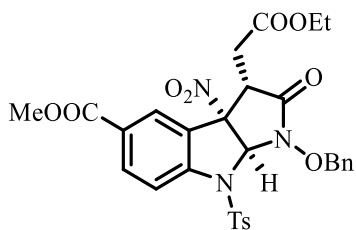

**4g**, white solid, m.p. = 167.3-169.5 °C. 113mg, 91% yield, 18:1 dr,  $^1\text{H}$  NMR (400 MHz,  $\text{CDCl}_3$ )  $\delta$  = 8.24 (d,  $J=1.2$ , 1H), 8.17 (dd,  $J=8.4, 1.6$ , 1H), 7.75 (d,  $J=8.4$ , 2H), 7.69 (d,  $J=8.4$ , 1H), 7.60 (dd,  $J=6.4, 2.8$ , 2H), 7.41 – 7.33 (m, 3H), 7.21 (d,  $J=8.4$ , 2H), 6.88 (s, 1H), 5.21 (dd,  $J=37.2, 8.8$ , 2H), 4.14 (q,  $J=7.2$ , 2H), 3.91 (s, 3H), 3.39 (t,  $J=4.8$ , 1H), 3.19 (dd,  $J=18.4, 4.4$ , 1H), 3.07 (dd,  $J=18.4, 5.6$ , 1H), 2.35 (s, 3H), 1.26 (t,  $J=7.2$ , 3H).  $^{13}\text{C}$  NMR (101 MHz,  $\text{CDCl}_3$ )  $\delta$  = 170.57, 165.41, 165.11, 145.72, 144.43, 134.96, 134.29, 133.78, 130.46, 130.11, 129.57, 129.24, 128.59, 127.95, 127.83, 127.80, 116.65, 90.62, 80.70, 77.84, 61.96, 52.64, 44.78, 33.32, 21.76, 14.13. HRMS (ESI) calcd for  $\text{C}_{30}\text{H}_{29}\text{N}_3\text{O}_{10}\text{S}$   $[\text{M}+\text{H}]^+$ : 624.1646. Found: 624.1641.

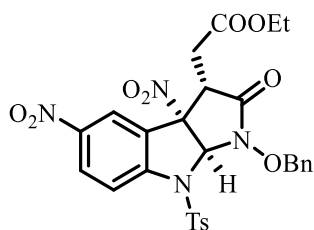

**4h**, yellow solid, m.p. = 180.1-183.7 °C. 90mg, 74% yield, 16:1 dr,  $^1\text{H}$  NMR (400 MHz,  $\text{CDCl}_3$ )  $\delta$  = 8.50 (d,  $J$ =2.4, 1H), 8.38 (dd,  $J$ =8.8, 2.4, 1H), 7.78 – 7.69 (m, 3H), 7.60 (dt,  $J$ =9.6, 2.8, 2H), 7.43 – 7.36 (m, 3H), 7.24 (d,  $J$ =8.0, 2H), 6.88 (s, 1H), 5.22 (dd,  $J$ =37.6, 8.8, 2H), 4.16 (q,  $J$ =7.2, 2H), 3.42 (dd,  $J$ =6.0, 4.0, 1H), 3.21 (dd,  $J$ =18.4, 4.0, 1H), 3.08 (dd,  $J$ =18.4, 6.0, 1H), 2.38 (s, 3H), 1.27 (t,  $J$ =7.2, 3H).  $^{13}\text{C}$  NMR (101 MHz,  $\text{CDCl}_3$ )  $\delta$  = 170.59, 164.87, 146.25, 145.91, 145.27, 133.98, 133.61, 130.50, 130.36, 130.13, 129.37, 129.13, 128.66, 127.76, 122.75, 116.91, 90.30, 80.99, 77.87, 62.15, 44.69, 33.28, 21.81, 14.14. HRMS (ESI) calcd for  $\text{C}_{28}\text{H}_{26}\text{N}_4\text{O}_{10}\text{S}$   $[\text{M}+\text{H}]^+$ : 611.1442. Found: 611.1446.

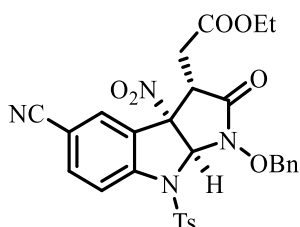

**4i**, white solid, m.p. = 161.6-162.4 °C. 89mg, 75% yield, 13:1 dr,  $^1\text{H}$  NMR (400 MHz,  $\text{CDCl}_3$ )  $\delta$  = 8.50 (d,  $J$ =2.0, 1H), 8.38 (dd,  $J$ =9.2, 2.4, 1H), 7.85 – 7.68 (m, 3H), 7.66 – 7.55 (m, 2H), 7.48 – 7.34 (m, 3H), 7.24 (d,  $J$ =8.0, 2H), 6.88 (s, 1H), 5.22 (dd,  $J$ =37.6, 9.2, 2H), 4.16 (q,  $J$ =7.2, 2H), 3.42 (dd,  $J$ =6.0, 4.0, 1H), 3.21 (dd,  $J$ =18.4, 4.0, 1H), 3.08 (dd,  $J$ =18.4, 6.0, 1H), 2.38 (s, 3H), 1.26 (t,  $J$ =7.2, 3H).  $^{13}\text{C}$  NMR (101 MHz,  $\text{CDCl}_3$ )  $\delta$  = 170.59, 164.87, 146.25, 145.90, 145.26, 133.98, 133.61, 130.50, 130.35, 130.12, 129.37, 129.13, 128.65, 127.75, 122.75, 116.90, 90.29, 80.98, 77.86, 62.14, 44.68, 33.28, 21.80, 14.14. HRMS (ESI) calcd for  $\text{C}_{29}\text{H}_{26}\text{N}_4\text{O}_8\text{S}$   $[\text{M}+\text{H}]^+$ : 591.1544. Found: 591.1565.

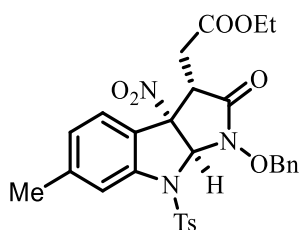

**4j**, white solid, m.p. = 134.1-137.6 °C. 95mg, 82% yield, 16:1 dr,  $^1\text{H}$  NMR (400 MHz,  $\text{CDCl}_3$ )  $\delta$  = 7.68 (d,  $J$ =8.4, 2H), 7.61 (m, 2H), 7.49 (d,  $J$ =8.4, 2H), 7.39 (m, 3H), 7.18 (d,  $J$ =8.0, 2H), 7.03 (d,  $J$ =8.0, 1H), 6.73 (s, 1H), 5.21 (dd,  $J$ =21.6, 8.8, 2H), 4.12 (q,  $J$ =7.2, 2H), 3.38 (dd,  $J$ =6.4, 4.0, 1H), 3.09 (dd,  $J$ =18.0, 4.0, 1H), 2.91 (dd,  $J$ =18.0, 6.4, 1H), 2.42 (s, 3H), 2.34 (s, 3H), 1.23 (t,  $J$ =7.2, 3H).  $^{13}\text{C}$  NMR (101 MHz,  $\text{CDCl}_3$ )  $\delta$  = 170.51, 165.35, 145.25, 144.23, 140.88, 134.50, 133.95, 130.43, 129.95, 129.14, 128.55, 127.67, 127.17, 126.55, 126.12, 117.90, 91.27, 80.81, 78.10, 61.78, 45.12, 33.42, 22.10, 21.71, 14.13. HRMS (ESI) calcd for  $\text{C}_{29}\text{H}_{29}\text{N}_3\text{O}_8\text{S}$   $[\text{M}+\text{H}]^+$ : 580.1748. Found: 580.1745.

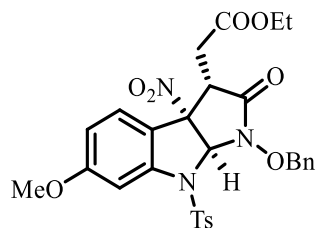

**4k**, white solid, m.p. = 103.6-106.3 °C. 95mg, 80% yield, 16:1 dr,  $^1\text{H}$  NMR (400 MHz,  $\text{CDCl}_3$ )  $\delta$  = 7.69 (d,  $J$ =8.4, 2H), 7.65 – 7.59 (m, 2H), 7.50 (d,  $J$ =8.8, 1H), 7.43 – 7.32 (m, 3H), 7.20 (dd,  $J$ =5.2, 2.8, 3H), 6.81 – 6.67 (m, 2H), 5.22 (dd,  $J$ =23.6, 9.2, 2H), 4.12 (q,  $J$ =7.2, 2H), 3.86 (s, 3H), 3.37 (dd,  $J$ =6.4, 4.0, 1H), 3.07 (dd,  $J$ =18.0, 4.0, 1H), 2.89 (dd,  $J$ =18.0, 6.4, 1H), 2.36 (s, 3H), 1.24 (t,  $J$ =7.2, 3H).  $^{13}\text{C}$  NMR (101 MHz,  $\text{CDCl}_3$ )  $\delta$  = 170.86, 165.76, 164.13, 145.70, 142.70, 134.75, 134.28, 130.78, 130.34, 129.50, 128.90, 128.06, 127.61, 121.46, 113.20, 102.91, 91.49, 81.48, 78.45, 62.12, 56.37, 45.51, 33.78, 22.07, 14.48. HRMS (ESI) calcd for  $\text{C}_{29}\text{H}_{29}\text{N}_3\text{O}_9\text{S}$   $[\text{M}+\text{H}]^+$ : 596.1697. Found: 596.1698.

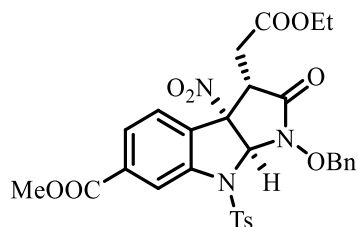

**4l**, white solid, m.p. = 157.2-158.6 °C. 112mg, 90% yield, 17:1 dr,  $^1\text{H}$  NMR (400 MHz,  $\text{CDCl}_3$ )  $\delta$  = 8.29 (d,  $J$ =1.2, 1H), 7.91 (dd,  $J$ =8.0, 1.2, 1H), 7.70 (m, 3H), 7.64 – 7.56 (m, 2H), 7.43 – 7.31 (m, 3H), 7.19 (d,  $J$ =8.0, 2H), 6.76 (s, 1H), 5.28 – 5.15 (m, 2H), 4.13 (q,  $J$ =7.2, 2H), 3.96 (d,  $J$ =11.2, 3H), 3.40 (dd,  $J$ =6.8, 4.0, 1H), 3.12 (dd,  $J$ =18.4, 4.0, 1H), 2.94 (dd,  $J$ =18.4, 6.8, 1H), 2.36 (s, 3H), 1.25 (t,  $J$ =7.2, 3H).  $^{13}\text{C}$  NMR (101 MHz,  $\text{CDCl}_3$ )  $\delta$  = 170.53, 165.58, 165.08, 145.63, 141.15, 135.07, 134.16, 133.79, 133.20, 130.47, 130.12, 129.27, 128.61, 127.74, 127.44, 126.72, 118.43, 91.05, 80.82, 78.17, 61.95, 52.91, 44.87, 33.36, 21.74, 14.14. HRMS (ESI) calcd for  $\text{C}_{30}\text{H}_{29}\text{N}_3\text{O}_{10}\text{S}$   $[\text{M}+\text{H}]^+$ : 624.1646. Found: 624.1647.

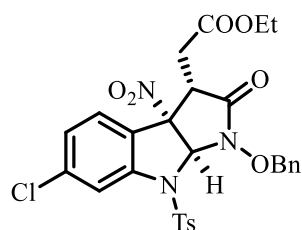

**4m**, white solid, m.p. = 148.1-150.5 °C. 101mg, 84% yield, 15:1 dr,  $^1\text{H}$  NMR (400 MHz,  $\text{CDCl}_3$ )  $\delta$  = 7.68 (m, 3H), 7.63 – 7.52 (m, 3H), 7.42 – 7.34 (m, 3H), 7.24 – 7.16 (m, 3H), 6.70 (s, 1H), 5.21 (q,  $J$ =9.2, 2H), 4.12 (q,  $J$ =7.2, 2H), 3.37 (dd,  $J$ =6.8, 4.0, 1H), 3.09 (dd,  $J$ =18.4, 4.0, 1H), 2.91 (dd,  $J$ =18.4, 6.8, 1H), 2.36 (s, 3H), 1.24 (t,  $J$ =7.2, 3H).  $^{13}\text{C}$  NMR (101 MHz,  $\text{CDCl}_3$ )  $\delta$  = 170.53, 165.17, 145.71, 141.91, 139.37, 134.13, 133.79, 130.49, 130.17, 129.25, 128.60, 127.68, 127.59, 127.54, 126.50, 117.80, 90.92, 80.92, 78.12, 61.92, 44.93, 33.35, 21.75, 14.13. HRMS (ESI) calcd for  $\text{C}_{28}\text{H}_{26}\text{ClN}_3\text{O}_8\text{S}$   $[\text{M}+\text{H}]^+$ : 600.1202. Found: 600.1206.

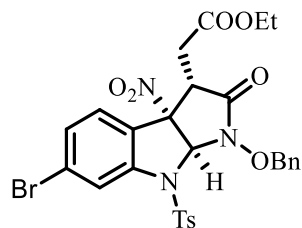

**4n**, white solid, m.p. = 101.5-105.7 °C. 103mg, 80% yield, 14:1 dr,  $^1\text{H NMR}$  (400 MHz,  $\text{CDCl}_3$ )  $\delta$  = 7.86 (d,  $J=1.6$ , 1H), 7.70 (d,  $J=8.4$ , 2H), 7.66 – 7.56 (m, 2H), 7.52 (d,  $J=8.4$ , 1H), 7.47 – 7.36 (m, 4H), 7.24 (d,  $J=8.0$ , 2H), 6.70 (s, 1H), 5.24 (q,  $J=9.2$ , 2H), 4.15 (q,  $J=7.2$ , 2H), 3.39 (dd,  $J=6.8$ , 4.0, 1H), 3.12 (dd,  $J=18.4$ , 4.0, 1H), 2.93 (dd,  $J=18.4$ , 6.8, 1H), 2.39 (s, 3H), 1.26 (t,  $J=7.2$ , 3H).  $^{13}\text{C NMR}$  (101 MHz,  $\text{CDCl}_3$ )  $\delta$  = 170.53, 165.17, 145.72, 141.96, 134.12, 133.80, 130.50, 130.18, 129.42, 129.26, 128.61, 128.14, 127.79, 127.68, 127.36, 120.73, 91.00, 80.84, 78.14, 61.93, 44.89, 33.35, 21.76, 14.14. HRMS (ESI) calcd for  $\text{C}_{28}\text{H}_{26}\text{BrN}_3\text{O}_8\text{S}$   $[\text{M}+\text{H}]^+$ : 644.0697. Found: 644.0684.

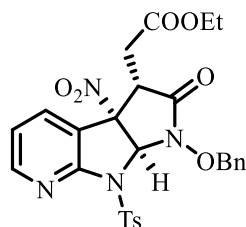

**4o**, white solid, m.p. = 190.0-194.1 °C. 82mg, 72% yield, 15:1 dr,  $^1\text{H NMR}$  (400 MHz,  $\text{CDCl}_3$ )  $\delta$  = 8.46 (dd,  $J=4.8$ , 1.6, 1H), 8.14 – 7.93 (m, 3H), 7.71 – 7.52 (m, 2H), 7.48 – 7.36 (m, 3H), 7.18 (d,  $J=8.0$ , 2H), 7.12 (m, 2H), 5.31 (d,  $J=8.8$ , 1H), 5.20 (d,  $J=8.8$ , 1H), 4.19 (q,  $J=7.2$ , 2H), 3.43 (dd,  $J=6.4$ , 4.0, 1H), 3.19 (dd,  $J=18.4$ , 4.0, 1H), 2.98 (dd,  $J=18.4$ , 6.4, 1H), 2.37 (s, 3H), 1.30 (t,  $J=7.2$ , 3H).  $^{13}\text{C NMR}$  (101 MHz,  $\text{CDCl}_3$ )  $\delta$  = 170.62, 164.73, 154.22, 152.98, 145.12, 135.68, 135.60, 133.66, 130.49, 129.53, 129.32, 128.79, 128.63, 121.60, 120.14, 89.59, 77.47, 62.02, 44.82, 33.40, 21.74, 14.17. HRMS (ESI) calcd for  $\text{C}_{27}\text{H}_{26}\text{N}_4\text{O}_8\text{S}$   $[\text{M}+\text{H}]^+$ : 567.1544. Found: 567.1551.

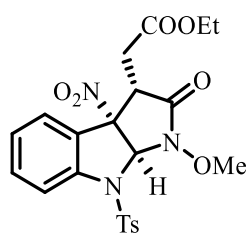

**4p**, white solid, m.p. = 175.7-177.4 °C. 73mg, 74% yield, 13:1 dr,  $^1\text{H NMR}$  (400 MHz,  $\text{CDCl}_3$ )  $\delta$  = 7.73 (d,  $J=8.4$ , 2H), 7.68 (d,  $J=8.4$ , 1H), 7.61 (d,  $J=7.6$ , 1H), 7.50 (t,  $J=7.6$ , 1H), 7.22 (t,  $J=7.6$ , 3H), 6.79 (s, 1H), 4.13 (q,  $J=7.2$ , 2H), 4.02 (s, 3H), 3.37 (dd,  $J=5.6$ , 4.4, 1H), 3.16 (dd,  $J=18.4$ , 4.0, 1H), 3.03 (dd,  $J=18.4$ , 5.6, 1H), 2.36 (s, 3H), 1.25 (t,  $J=7.2$ , 3H).  $^{13}\text{C NMR}$  (101 MHz,  $\text{CDCl}_3$ )  $\delta$  = 170.62, 165.05, 145.35, 140.75, 134.47, 133.28, 129.98, 129.25, 127.81, 126.32, 126.07, 117.25, 91.22, 79.86, 63.72, 61.86, 45.03, 33.30, 21.73, 14.14. HRMS (ESI) calcd for  $\text{C}_{22}\text{H}_{23}\text{N}_3\text{O}_8\text{S}$   $[\text{M}+\text{H}]^+$ : 490.1279. Found: 490.1288.

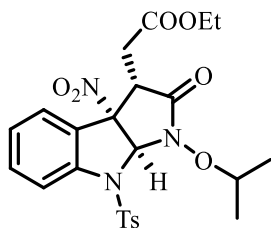

**4q**, white solid, m.p. = 100.9-102.4 °C. 50mg, 52% yield, 18:1 dr,  $^1\text{H}$  NMR (400 MHz,  $\text{CDCl}_3$ )  $\delta$  = 7.72 (d,  $J=8.0$ , 1H), 7.65 (t,  $J=8.0$ , 3H), 7.51 (t,  $J=8.0$ , 1H), 7.23 (t,  $J=8.0$ , 1H), 7.18 (d,  $J=8.0$ , 2H), 6.68 (s, 1H), 4.67 (dt,  $J=12.4$ , 6.4, 1H), 4.13 (q,  $J=7.2$ , 2H), 3.42 (dd,  $J=6.4$ , 4.0, 1H), 3.14 (dd,  $J=18.0$ , 4.0, 1H), 2.94 (dd,  $J=18.0$ , 6.0, 1H), 2.34 (s, 3H), 1.34 (dd,  $J=8.4$ , 6.4, 6H), 1.25 (t,  $J=7.2$ , 3H).  $^{13}\text{C}$  NMR (101 MHz,  $\text{CDCl}_3$ )  $\delta$  = 170.58, 166.72, 145.33, 140.79, 134.30, 133.23, 129.96, 129.51, 127.72, 126.66, 126.29, 117.66, 91.39, 81.39, 79.41, 61.85, 45.12, 33.44, 21.75, 21.08, 21.03, 14.16. HRMS (ESI) calcd for  $\text{C}_{24}\text{H}_{27}\text{N}_3\text{O}_8\text{S}$   $[\text{M}+\text{H}]^+$ : 518.1592. Found: 518.1597.

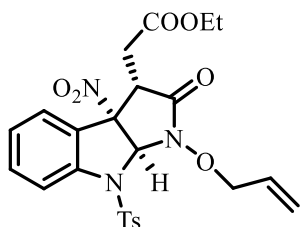

**4r**, white solid, m.p. = 118.0-120.3 °C. 76mg, 74% yield, 15:1 dr,  $^1\text{H}$  NMR (400 MHz,  $\text{CDCl}_3$ )  $\delta$  = 7.70 (m, 3H), 7.63 (m, 1H), 7.51 (td,  $J=8.0$ , 1.2, 1H), 7.26 – 7.18 (m, 3H), 6.74 (s, 1H), 6.15 (ddt,  $J=17.2$ , 10.0, 6.8, 1H), 5.50 – 5.16 (m, 2H), 4.72 (ddd,  $J=26.0$ , 10.8, 6.8, 2H), 4.14 (q,  $J=7.2$ , 2H), 3.41 (dd,  $J=6.4$ , 4.0, 1H), 3.14 (dd,  $J=18.0$ , 4.0, 1H), 2.96 (dd,  $J=18.0$ , 6.4, 1H), 2.36 (s, 3H), 1.26 (t,  $J=7.2$ , 3H).  $^{13}\text{C}$  NMR (101 MHz,  $\text{CDCl}_3$ )  $\delta$  = 170.50, 165.52, 145.36, 140.78, 134.43, 133.24, 131.59, 129.99, 129.29, 127.74, 126.57, 126.16, 121.85, 117.40, 91.33, 80.57, 77.42, 61.84, 45.08, 33.46, 21.73, 14.15.  $\text{C}_{24}\text{H}_{25}\text{N}_3\text{O}_8\text{S}$   $[\text{M}+\text{H}]^+$ : 516.1435. Found: 516.1445.

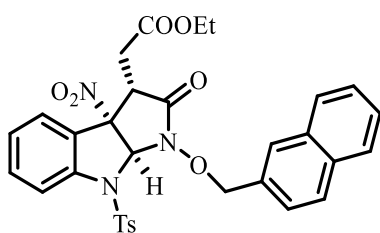

**4s**, white solid, m.p. = 172.4-175.3 °C. 111mg, 90% yield, 18:1 dr,  $^1\text{H}$  NMR (400 MHz,  $\text{CDCl}_3$ )  $\delta$  = 7.99 (s, 1H), 7.82 (m, 4H), 7.66 (d,  $J=8.4$ , 2H), 7.60 (t,  $J=7.2$ , 2H), 7.55 – 7.39 (m, 3H), 7.20 (t,  $J=7.6$ , 1H), 7.15 (d,  $J=8.0$ , 2H), 6.76 (s, 1H), 5.39 (dd,  $J=21.2$ , 9.2, 2H), 4.12 (q,  $J=7.2$ , 2H), 3.40 (dd,  $J=6.4$ , 4.0, 1H), 3.11 (dd,  $J=18.0$ , 4.0, 1H), 2.94 (dd,  $J=18.0$ , 6.4, 1H), 2.33 (s, 3H), 1.24 (t,  $J=7.2$ , 3H).  $^{13}\text{C}$  NMR (101 MHz,  $\text{CDCl}_3$ )  $\delta$  = 170.55, 165.40, 145.33, 140.76, 134.40, 133.79, 133.25, 133.13, 131.44, 130.00, 129.97, 129.27, 128.44, 128.36, 127.83, 127.71, 126.57, 126.52, 126.17, 117.56, 91.38, 80.62, 78.19, 61.86, 45.08, 33.42, 21.71, 14.15.  $\text{C}_{32}\text{H}_{29}\text{N}_3\text{O}_8\text{S}$   $[\text{M}+\text{H}]^+$ : 616.1748. Found: 616.1752.



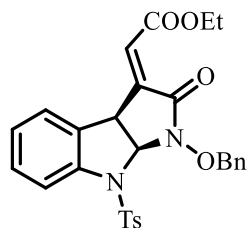

**5a**, white solid, m.p. = 138.8-141.3 °C. 80mg, 77% yield, dr>20:1,  $^1\text{H}$  NMR (400 MHz,  $\text{CDCl}_3$ )  $\delta$  7.76 – 7.51 (m, 5H), 7.38 – 7.37 (m, 3H), 7.31 (t,  $J$  = 7.8 Hz, 1H), 7.23 (d,  $J$  = 7.6 Hz, 1H), 7.18 (d,  $J$  = 7.8 Hz, 2H), 7.09 (t,  $J$  = 7.6 Hz, 1H), 6.75 (s, 1H), 5.92 (d,  $J$  = 6.4 Hz, 1H), 5.23 (s, 2H), 4.93 (d,  $J$  = 6.3 Hz, 1H), 4.30 – 4.25 (m, 2H), 2.36 (s, 3H), 1.32 (t,  $J$  = 7.2 Hz, 3H).  $^{13}\text{C}$  NMR (101 MHz,  $\text{CDCl}_3$ )  $\delta$  165.69, 160.63, 144.83, 144.26, 139.70, 134.94, 133.87, 131.20, 130.21, 129.98, 129.56, 129.02, 128.43, 126.94, 126.06, 126.03, 121.56, 118.12, 78.87, 77.47, 61.30, 43.09, 21.55, 14.04. HRMS (ESI) calcd for  $\text{C}_{28}\text{H}_{26}\text{N}_2\text{O}_6\text{S}$   $[\text{M}+\text{H}]^+$ : 519.1584. Found: 519.1569.

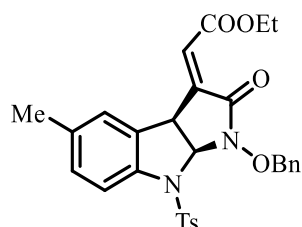

**5b**, white solid, m.p. = 158.5-160.7 °C. 64mg, 60% yield, dr>20:1,  $^1\text{H}$  NMR (400 MHz,  $\text{CDCl}_3$ )  $\delta$  = 7.63 – 7.48 (m, 5H), 7.37 (m, 3H), 7.18 (d,  $J$  = 8.0, 2H), 7.11 (d,  $J$  = 8.0, 1H), 6.99 (s, 1H), 6.74 (s, 1H), 5.87 (d,  $J$  = 6.4, 1H), 5.22 (s, 2H), 4.84 (d,  $J$  = 6.4, 1H), 4.35 – 4.22 (m, 2H), 2.37 (s, 3H), 2.26 (s, 3H), 1.33 (t,  $J$  = 7.2, 3H).  $^{13}\text{C}$  NMR (101 MHz,  $\text{CDCl}_3$ )  $\delta$  = 165.90, 160.80, 144.88, 144.60, 137.49, 136.23, 135.07, 134.07, 131.45, 130.43, 130.37, 130.13, 129.17, 128.60, 127.12, 126.60, 121.59, 118.20, 79.13, 77.94, 61.44, 43.26, 21.72, 21.29, 14.21. HRMS (ESI) calcd for  $\text{C}_{29}\text{H}_{28}\text{N}_2\text{O}_6\text{S}$   $[\text{M}+\text{H}]^+$ : 533.1741. Found: 533.1749.

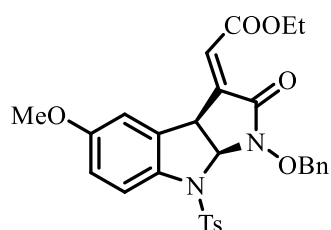

**5c**, white solid, m.p. = 192.7-195.6 °C. 77mg, 71% yield, dr>20:1,  $^1\text{H}$  NMR (400 MHz,  $\text{CDCl}_3$ )  $\delta$  = 7.64 – 7.55 (m, 3H), 7.51 (d,  $J$  = 8.4, 2H), 7.43 – 7.35 (m, 3H), 7.19 (d,  $J$  = 8.4, 2H), 6.88 – 6.82 (m, 1H), 6.79 (m, 1H), 6.74 (d,  $J$  = 1.6, 1H), 5.85 (d,  $J$  = 6.4, 1H), 5.23 (s, 2H), 4.79 (d,  $J$  = 6.4, 1H), 4.35 – 4.17 (m, 2H), 3.74 (s, 3H), 2.38 (s, 3H), 1.32 (t,  $J$  = 7.2, 3H).  $^{13}\text{C}$  NMR (101 MHz,  $\text{CDCl}_3$ )  $\delta$  = 165.84, 160.69, 158.40, 144.90, 144.37, 134.87, 134.12, 133.24, 133.11, 130.36, 130.14, 129.17, 128.60, 127.16, 121.78, 119.53, 114.98, 111.89, 79.15, 78.26, 61.46, 55.72, 43.38, 21.72, 14.20. HRMS (ESI) calcd for  $\text{C}_{29}\text{H}_{28}\text{N}_2\text{O}_7\text{S}$   $[\text{M}+\text{H}]^+$ : 549.1690. Found: 549.1681.

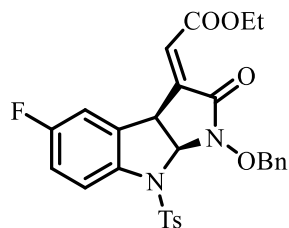

**5d**, m.p. = 147.3-151.8 °C. white solid, 96mg, 90% yield, dr>20:1,  $^1\text{H}$  NMR (400 MHz,  $\text{CDCl}_3$ )  $\delta$  = 7.64 – 7.46 (m, 5H), 7.37 (m, 3H), 7.20 (d,  $J=8.0$ , 2H), 7.00 (m, 2H), 6.73 (s, 1H), 5.87 (d,  $J=6.4$ , 1H), 5.23 (s, 2H), 4.84 (d,  $J=6.4$ , 1H), 4.39 – 4.14 (m, 2H), 2.37 (s, 3H), 1.33 (t,  $J=7.2$ , 3H).  $^{13}\text{C}$  NMR (101 MHz,  $\text{CDCl}_3$ )  $\delta$  165.82, 161.01( $J = 244.4$ ), 160.62, 145.23, 143.82, 135.93( $J = 2.2$ ), 134.75, 133.97, 133.67, 130.42, 130.26, 129.26, 128.63, 127.12, 122.22, 119.58( $J = 8.6$ ), 119.54, 116.68( $J = 23.7$ ), 113.80( $J = 25.2$ ), 79.06, 78.19, 61.65, 43.19, 21.75, 14.19.  $^{19}\text{F}$  NMR (376 MHz,  $\text{CDCl}_3$ )  $\delta$  -115.2 (m). HRMS (ESI) calcd for  $\text{C}_{28}\text{H}_{25}\text{FN}_2\text{O}_6\text{S}$   $[\text{M}+\text{H}]^+$ : 537.1490. Found: 537.1498.

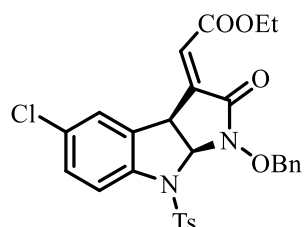

**5e**, white solid, m.p. = 164.5-166.6 °C. 80mg, 73% yield, dr>20:1,  $^1\text{H}$  NMR (400 MHz,  $\text{CDCl}_3$ )  $\delta$  = 7.55 (m, 5H), 7.37 (m, 3H), 7.24 (m, 4H), 6.77 (s, 1H), 5.87 (d,  $J=6.4$ , 1H), 5.31 – 5.10 (m, 2H), 4.87 (d,  $J=6.4$ , 1H), 4.43 – 4.12 (m, 2H), 2.38 (s, 3H), 1.33 (t,  $J=7.2$ , 3H).  $^{13}\text{C}$  NMR (101 MHz,  $\text{CDCl}_3$ )  $\delta$  = 165.82, 160.64, 145.31, 143.63, 138.62, 134.87, 133.95, 133.20, 131.60, 130.44, 130.33, 129.92, 129.28, 128.65, 127.09, 126.63, 122.33, 119.22, 79.03, 77.89, 61.68, 43.08, 21.76, 14.20. HRMS (ESI) calcd for  $\text{C}_{28}\text{H}_{25}\text{ClN}_2\text{O}_6\text{S}$   $[\text{M}+\text{H}]^+$ : 553.1195. Found: 553.1197.

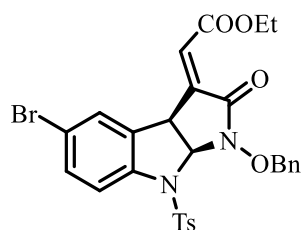

**5f**, white solid, m.p. = 175.5-176.6 °C. 100mg, 84% yield, dr>20:1,  $^1\text{H}$  NMR (400 MHz,  $\text{CDCl}_3$ )  $\delta$  = 7.56 (m, 4H), 7.46 (m, 2H), 7.37 (s, 4H), 7.22 (d,  $J=8.0$ , 2H), 6.78 (s, 1H), 5.87 (d,  $J=6.4$ , 1H), 5.27 – 5.13 (m, 2H), 4.89 (d,  $J=6.4$ , 1H), 4.42 – 4.15 (m, 2H), 2.39 (s, 3H), 1.34 (t,  $J=7.2$ , 3H).  $^{13}\text{C}$  NMR (101 MHz,  $\text{CDCl}_3$ )  $\delta$  = 165.80, 160.63, 145.32, 143.58, 139.13, 134.86, 133.94, 133.47, 132.82, 130.43, 130.33, 129.53, 129.27, 128.64, 127.08, 122.35, 119.57, 119.11, 79.01, 77.78, 61.68, 43.01, 21.76, 14.19. HRMS (ESI) calcd for  $\text{C}_{28}\text{H}_{25}\text{BrN}_2\text{O}_6\text{S}$   $[\text{M}+\text{H}]^+$ : 597.0689. Found: 597.0694.

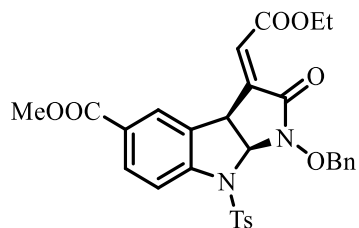

**5g**, white solid, m.p. = 174.5-176.2 °C. 103mg, 89% yield, dr>20:1,  $^1\text{H}$  NMR (400 MHz,  $\text{CDCl}_3$ )  $\delta$  = 8.00 (d,  $J=8.4$ , 1H), 7.96 – 7.78 (m, 1H), 7.60 (dd,  $J=14.8$ , 8.0, 5H), 7.37 (s, 3H), 7.19 (d,  $J=8.0$ , 2H), 6.79 (s, 1H), 5.95 (d,  $J=6.4$ , 1H), 5.31 – 5.14 (m, 2H), 5.01 (d,  $J=6.4$ , 1H), 4.45 – 4.22 (m, 2H), 3.88 (s, 3H), 2.39 (s, 3H), 1.38 (t,  $J=7.2$ , 3H).  $^{13}\text{C}$  NMR (101 MHz,  $\text{CDCl}_3$ )  $\delta$  = 165.97, 165.67, 160.60, 145.22, 143.66, 143.24, 134.90, 133.71, 131.56, 131.27, 130.28, 130.15, 129.11, 128.46, 127.74, 127.70, 126.89, 122.27, 117.10, 78.69, 77.55, 61.51, 52.17, 42.62, 21.57, 14.02. HRMS (ESI) calcd for  $\text{C}_{30}\text{H}_{28}\text{N}_2\text{O}_8\text{S}$   $[\text{M}+\text{H}]^+$ : 577.1639. Found: 577.1646.

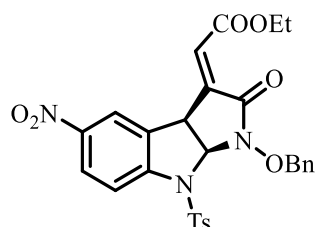

**5h**, white solid, m.p. = 95.5-98.5 °C. 74mg, 66% yield, dr>20:1,  $^1\text{H}$  NMR (400 MHz,  $\text{CDCl}_3$ )  $\delta$  = 8.27 – 8.09 (m, 2H), 7.61 (m, 5H), 7.38 (s, 3H), 7.29 – 7.18 (m, 2H), 6.85 (s, 1H), 5.99 (d,  $J=6.4$ , 1H), 5.27 – 5.18 (m, 2H), 5.08 (d,  $J=6.4$ , 1H), 4.51 – 4.16 (m, 2H), 2.39 (s, 3H), 1.38 (t,  $J=7.2$ , 3H).  $^{13}\text{C}$  NMR (101 MHz,  $\text{CDCl}_3$ )  $\delta$  = 165.85, 160.61, 145.87, 145.58, 145.33, 142.60, 134.90, 133.72, 132.43, 130.51, 129.40, 128.68, 127.09, 126.01, 123.13, 122.57, 117.08, 78.75, 77.81, 62.01, 42.62, 21.78, 14.20. HRMS (ESI) calcd for  $\text{C}_{28}\text{H}_{25}\text{N}_3\text{O}_8\text{S}$   $[\text{M}+\text{H}]^+$ : 564.1435. Found: 564.1431.

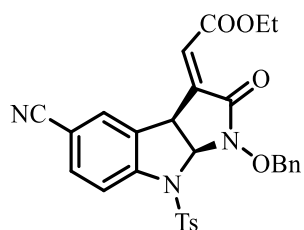

**5i**, white solid, m.p. = 182.3-184.1 °C. 81mg, 75% yield, dr>20:1,  $^1\text{H}$  NMR (400 MHz,  $\text{CDCl}_3$ )  $\delta$  = 7.61 (m, 7H), 7.38 (m, 3H), 7.31 – 7.17 (m, 2H), 6.82 (s, 1H), 5.94 (d,  $J=6.4$ , 1H), 5.26 – 5.17 (m, 2H), 5.01 (d,  $J=6.4$ , 1H), 4.47 – 4.18 (m, 2H), 2.39 (s, 3H), 1.36 (t,  $J=7.2$ , 3H).  $^{13}\text{C}$  NMR (101 MHz,  $\text{CDCl}_3$ )  $\delta$  = 165.84, 160.56, 145.76, 143.78, 143.02, 134.94, 134.17, 133.74, 132.31, 130.62, 130.48, 129.38, 128.67, 127.06, 122.83, 118.43, 117.88, 109.33, 78.79, 77.38, 61.92, 42.82, 21.78, 14.20. HRMS (ESI) calcd for  $\text{C}_{29}\text{H}_{25}\text{N}_3\text{O}_6\text{S}$   $[\text{M}+\text{H}]^+$ : 544.1537. Found: 544.1532.

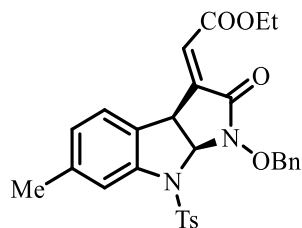

**5j**, white solid, m.p. = 169.1-171.1 °C. 64mg, 60% yield, dr>20:1,  $^1\text{H}$  NMR (400 MHz,  $\text{CDCl}_3$ )  $\delta$  = 7.57 (m, 4H), 7.45 (s, 1H), 7.38 (m, 3H), 7.19 (d,  $J=8.0$ , 2H), 7.09 (d,  $J=8.0$ , 1H), 6.89 (d,  $J=8.0$ , 1H), 6.72 (s, 1H), 5.87 (d,  $J=6.4$ , 1H), 5.22 (s, 2H), 4.85 (d,  $J=6.4$ , 1H), 4.27 (q,  $J=7.2$ , 2H), 2.37 (s, 6H), 1.32 (t,  $J=7.2$ , 3H).  $^{13}\text{C}$  NMR (101 MHz,  $\text{CDCl}_3$ )  $\delta$  = 165.88, 160.82, 144.92, 144.65, 140.10, 139.97, 135.20, 134.07, 130.38, 130.14, 129.15, 128.60, 128.48, 127.08, 125.78, 121.51, 118.90, 79.09, 77.95, 61.42, 42.99, 21.77, 21.73, 14.21. HRMS (ESI) calcd for  $\text{C}_{29}\text{H}_{28}\text{N}_2\text{O}_6\text{S}$   $[\text{M}+\text{H}]^+$ : 533.1741. Found: 533.1766.

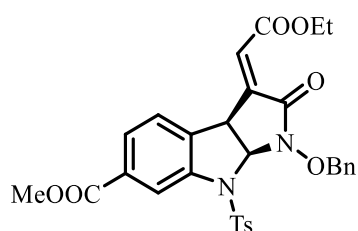

**5l**, white solid, m.p. = 178.9-181.0 °C. 101mg, 88% yield, dr>20:1,  $^1\text{H}$  NMR (400 MHz,  $\text{CDCl}_3$ )  $\delta$  = 8.22 (s, 1H), 7.78 (d,  $J=8.0$ , 1H), 7.57 (m, 4H), 7.36 (m, 3H), 7.31 (d,  $J=8.0$ , 1H), 7.19 (d,  $J=8.0$ , 2H), 6.77 (s, 1H), 5.94 (d,  $J=6.4$ , 1H), 5.22 (s, 2H), 4.98 (d,  $J=6.4$ , 1H), 4.43 – 4.17 (m, 2H), 3.95 (s, 3H), 2.37 (s, 3H), 1.33 (t,  $J=7.2$ , 3H).  $^{13}\text{C}$  NMR (101 MHz,  $\text{CDCl}_3$ )  $\delta$  = 166.22, 165.82, 160.67, 145.28, 143.58, 140.28, 136.21, 134.96, 133.90, 131.97, 130.41, 130.29, 129.26, 128.62, 127.69, 127.12, 126.26, 122.31, 119.03, 79.05, 77.82, 61.64, 52.61, 43.24, 21.74, 14.20. HRMS (ESI) calcd for  $\text{C}_{30}\text{H}_{28}\text{N}_2\text{O}_8\text{S}$   $[\text{M}+\text{H}]^+$ : 577.1639. Found: 577.1631.

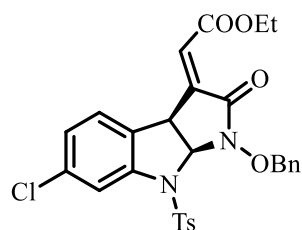

**5m**, white solid, m.p. = 204.5-206.9 °C. 74mg, 67% yield, dr>20:1,  $^1\text{H}$  NMR (400 MHz,  $\text{CDCl}_3$ )  $\delta$  = 7.57 (d,  $J=8.0$ , 5H), 7.38 (m, 3H), 7.22 (d,  $J=8.0$ , 2H), 7.16 (d,  $J=8.0$ , 1H), 7.04 (d,  $J=8.0$ , 1H), 6.76 (s, 1H), 5.87 (d,  $J=6.4$ , 1H), 5.22 (s, 2H), 4.86 (d,  $J=6.4$ , 1H), 4.27 (q,  $J=7.2$ , 2H), 2.39 (s, 3H), 1.32 (t,  $J=7.2$ , 3H).  $^{13}\text{C}$  NMR (101 MHz,  $\text{CDCl}_3$ )  $\delta$  = 165.85, 160.81, 145.34, 143.91, 141.04, 135.48, 134.97, 133.92, 132.11, 130.46, 130.34, 129.81, 129.26, 128.64, 127.10, 126.25, 122.07, 118.44, 78.97, 77.94, 61.60, 42.82, 21.77, 14.21. HRMS (ESI) calcd for  $\text{C}_{28}\text{H}_{25}\text{ClN}_2\text{O}_6\text{S}$   $[\text{M}+\text{H}]^+$ : 553.1195. Found: 553.1185.

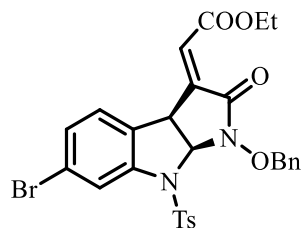

**5n**, white solid, m.p. = 214.2-216.0 °C. 97mg, 81% yield, dr>20:1, <sup>1</sup>H NMR (400 MHz, CDCl<sub>3</sub>) δ = 7.80 – 7.66 (s, 1H), 7.52 (m, 4H), 7.38 (m, 3H), 7.25 – 7.16 (m, 3H), 7.14 – 7.02 (m, 1H), 6.76 (s, 1H), 5.79 (m, *J*=6.4, 1H), 5.26 – 5.18 (m, 2H), 4.83 (d, *J*=6.4, 1H), 4.39 – 4.02 (m, 2H), 2.39 (s, 3H), 1.32 (t, *J*=7.2, 3H). <sup>13</sup>C NMR (101 MHz, CDCl<sub>3</sub>) δ = 165.81, 160.70, 145.34, 143.78, 141.14, 134.87, 133.87, 130.45, 130.34, 129.26, 129.16, 128.62, 127.46, 127.05, 123.18, 122.08, 121.27, 78.96, 77.84, 61.59, 42.86, 21.76, 14.19. HRMS (ESI) calcd for C<sub>28</sub>H<sub>25</sub>BrN<sub>2</sub>O<sub>6</sub>S [M+H]<sup>+</sup>: 597.0689. Found: 597.0696.

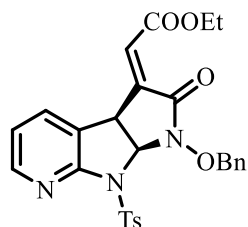

**50**, white solid, m.p. = 187.0-189.9 °C. 50mg, 48% yield, dr>20:1, <sup>1</sup>H NMR (400 MHz, CDCl<sub>3</sub>) δ = 8.22 (m, 1H), 7.92 (d, *J*=8.0, 2H), 7.63 (m, 1H), 7.57 (m, 2H), 7.39 (m, 3H), 7.13 (d, *J*=8.0, 2H), 7.02 – 6.85 (m, 1H), 6.79 (s, 1H), 6.31 (d, *J*=6.4, 1H), 5.32 (d, *J*=6.4, 1H), 5.18 (m, 2H), 4.38 – 4.11 (m, 2H), 2.35 (s, 3H), 1.36 (t, *J*=7.2, 3H). <sup>13</sup>C NMR (101 MHz, CDCl<sub>3</sub>) δ = 165.75, 160.30, 154.20, 149.25, 144.66, 143.65, 136.46, 135.31, 133.67, 130.34, 129.51, 129.33, 128.64, 128.41, 123.43, 122.21, 119.86, 78.02, 73.73, 61.66, 41.45, 21.74, 14.27. HRMS (ESI) calcd for C<sub>27</sub>H<sub>25</sub>N<sub>3</sub>O<sub>6</sub>S [M+H]<sup>+</sup>: 520.1537. Found: 520.1534.

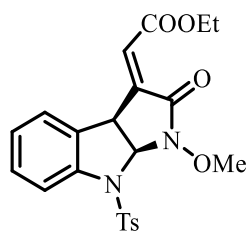

**5p**, white solid, m.p. = 85.5-88.5 °C. 75mg, 85% yield, dr>20:1, <sup>1</sup>H NMR (400 MHz, CDCl<sub>3</sub>) δ = 7.67 (d, *J*=8.0, 1H), 7.61 (d, *J*=8.0, 2H), 7.34 (t, *J*=7.6, 1H), 7.28 – 7.19 (m, 3H), 7.11 (t, *J*=7.6, 1H), 6.78 (d, 1H), 6.00 (d, *J*=6.4, 1H), 5.00 (d, *J*=6.4, 1H), 4.39 – 4.22 (m, 2H), 4.05 (s, 3H), 2.40 (s, 3H), 1.34 (t, *J*=7.2, 3H). <sup>13</sup>C NMR (101 MHz, CDCl<sub>3</sub>) δ = 165.84, 160.58, 145.06, 144.34, 139.84, 135.19, 131.25, 130.18, 129.81, 127.17, 126.34, 126.19, 121.94, 118.05, 64.97, 61.49, 43.24, 28.30, 21.73, 14.21. HRMS (ESI) calcd for C<sub>22</sub>H<sub>22</sub>N<sub>2</sub>O<sub>6</sub>S [M+H]<sup>+</sup>: 443.1271. Found: 443.1271.

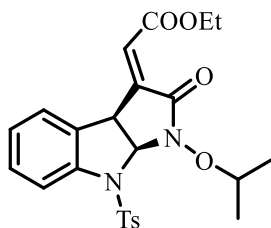

**5q**, white solid, m.p. = 153.3-155.7 °C. 84mg, 89% yield, dr>20:1,  $^1\text{H}$  NMR (400 MHz,  $\text{CDCl}_3$ )  $\delta$  = 7.64 (d,  $J=8.0$ , 1H), 7.56 (d,  $J=8.0$ , 2H), 7.31 (t,  $J=8.0$ , 1H), 7.21 (m, 3H), 7.08 (t,  $J=8.0$ , 1H), 6.71 (s, 1H), 5.89 (d,  $J=6.4$ , 1H), 4.91 (d,  $J=6.4$ , 1H), 4.70 (m, 1H), 4.27 (q,  $J=7.2$ , 2H), 2.36 (s, 3H), 1.31 (m, 9H).  $^{13}\text{C}$  NMR (101 MHz,  $\text{CDCl}_3$ )  $\delta$  = 165.92, 161.99, 144.96, 144.50, 139.91, 135.21, 131.63, 130.14, 129.75, 127.06, 126.25, 126.23, 121.71, 118.27, 79.78, 78.17, 61.43, 43.20, 21.71, 21.18, 14.19. HRMS (ESI) calcd for  $\text{C}_{24}\text{H}_{26}\text{N}_2\text{O}_6\text{S}$   $[\text{M}+\text{H}]^+$ : 471.1584. Found: 471.1582.

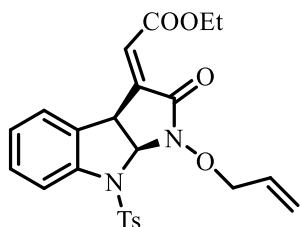

**5r**, white solid, m.p. = 134.2-136.5 °C. 48mg, 51% yield, dr>20:1,  $^1\text{H}$  NMR (400 MHz,  $\text{CDCl}_3$ )  $\delta$  = 7.63 (d,  $J=8.0$ , 1H), 7.60 – 7.56 (m, 2H), 7.34 – 7.28 (m, 1H), 7.21 (m, 3H), 7.08 (m, 1H), 6.74 (d,  $J=1.6$ , 1H), 6.25 – 6.04 (m, 1H), 5.94 (d,  $J=6.4$ , 1H), 5.38 – 5.24 (m, 2H), 4.95 (d,  $J=6.4$ , 1H), 4.73 (qd,  $J=11.2$ , 6.8, 2H), 4.27 (qd,  $J=7.2$ , 1.4, 2H), 2.37 (s, 3H), 1.32 (t,  $J=7.2$ , 3H).  $^{13}\text{C}$  NMR (101 MHz,  $\text{CDCl}_3$ )  $\delta$  = 165.71, 160.92, 144.86, 144.19, 139.68, 134.99, 131.54, 131.20, 130.00, 129.59, 126.93, 126.11, 125.99, 121.82, 121.62, 117.92, 78.08, 77.45, 61.30, 43.10, 21.57, 14.04. HRMS (ESI) calcd for  $\text{C}_{24}\text{H}_{24}\text{N}_2\text{O}_6\text{S}$   $[\text{M}+\text{H}]^+$ : 469.1428. Found: 469.1438.

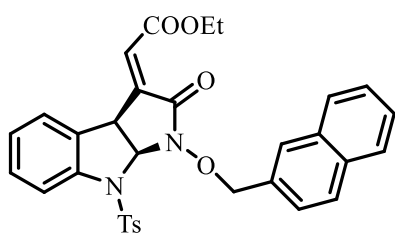

**5s**, white solid, m.p. = 196.4-198.7 °C. 66mg, 58% yield, dr>20:1,  $^1\text{H}$  NMR (400 MHz,  $\text{CDCl}_3$ )  $\delta$  = 7.95 (s, 1H), 7.90 – 7.79 (m, 3H), 7.76 (dd,  $J=8.4$ , 1.6, 1H), 7.56 – 7.44 (m, 5H), 7.25 – 7.17 (m, 2H), 7.14 (d,  $J=8.0$ , 2H), 7.04 (t,  $J=7.2$ , 1H), 6.75 (d,  $J=1.6$ , 1H), 5.88 (d,  $J=6.4$ , 1H), 5.39 (s, 2H), 4.88 (d,  $J=6.4$ , 1H), 4.37 – 4.20 (m, 2H), 2.33 (s, 3H), 1.31 (t,  $J=7.2$ , 3H).  $^{13}\text{C}$  NMR (101 MHz,  $\text{CDCl}_3$ )  $\delta$  = 165.85, 160.93, 144.95, 144.40, 139.83, 135.14, 133.79, 133.24, 131.59, 131.34, 130.12, 129.94, 129.63, 128.48, 128.39, 127.82, 127.78, 127.07, 126.57, 126.14, 121.74, 118.30, 79.03, 77.73, 61.45, 43.28, 21.69, 14.20. HRMS (ESI) calcd for  $\text{C}_{32}\text{H}_{28}\text{N}_2\text{O}_6\text{S}$   $[\text{M}+\text{H}]^+$ : 569.1741. Found: 569.1750.

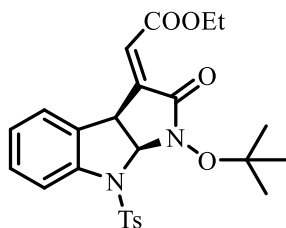

**5t**, white solid, m.p. = 145.9-146.9 °C. 88mg, 91% yield, dr>20:1,  $^1\text{H}$  NMR (400 MHz,  $\text{CDCl}_3$ )  $\delta$  = 7.65 (d,  $J=8.0$ , 1H), 7.52 (m, 2H), 7.31 (t,  $J=8.0$ , 1H), 7.19 (m, 3H), 7.09 (t,  $J=8.0$ , 1H), 6.73 (s, 1H), 5.73 (d,  $J=6.4$ , 1H), 4.82 (d,  $J=5.6$ , 1H), 4.39 – 4.18 (m, 2H), 2.35 (s, 3H), 1.49 – 1.40 s, 9H), 1.30 (t,  $J=14.8$ , 7.2, 3H).  $^{13}\text{C}$  NMR (101 MHz,  $\text{CDCl}_3$ )  $\delta$  = 165.89, 164.34, 144.84, 144.35, 140.12, 135.33, 132.22, 130.07, 129.67, 127.03, 126.39, 126.12, 121.72, 118.79, 86.81, 79.43, 61.40, 43.36, 28.30, 21.70, 14.18. HRMS (ESI) calcd for  $\text{C}_{25}\text{H}_{28}\text{N}_2\text{O}_6\text{S}$   $[\text{M}+\text{H}]^+$ : 485.1741. Found: 485.1738.

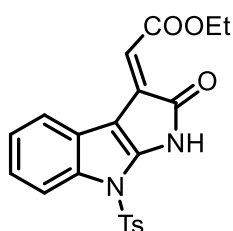

**6a**, red solid, m.p. no data(carbonized), 49mg, 60% yield,  $^1\text{H}$  NMR (400 MHz,  $\text{CDCl}_3$ )  $\delta$  8.33 (s, 1H), 8.24 (d,  $J = 8.0$  Hz, 1H), 7.84 (d,  $J = 8.2$  Hz, 1H), 7.80 (d,  $J = 7.8$  Hz, 2H), 7.30 – 7.26 (m, 3H), 7.18 (t,  $J = 7.8$  Hz, 1H), 6.59 (s, 1H), 4.32 (q,  $J = 7.2$  Hz, 2H), 2.38 (s, 3H), 1.36 (t,  $J = 7.2$  Hz, 3H).  $^{13}\text{C}$  NMR (101 MHz,  $\text{CDCl}_3$ )  $\delta$  170.92, 166.04, 148.59, 146.61, 135.35, 133.63, 133.49, 130.40, 127.17, 125.40, 125.30, 123.02, 122.62, 115.70, 113.26, 60.98, 21.66, 14.23. HRMS (ESI) calcd for  $\text{C}_{21}\text{H}_{18}\text{N}_2\text{O}_5\text{S}$   $[\text{M}+\text{H}]^+$ : 411.1009. Found: 411.1000.

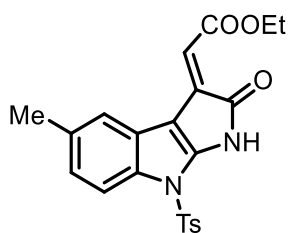

**6b**, red solid, m.p. no data(carbonized), 42mg, 50% yield,  $^1\text{H}$  NMR (400 MHz,  $\text{CDCl}_3$ )  $\delta$  = 8.19 (s, 1H), 8.00 (s, 1H), 7.77 (d,  $J=8.4$ , 2H), 7.70 (d,  $J=8.4$ , 1H), 7.28 (d,  $J=8.4$ , 2H), 7.03 – 6.94 (m, 1H), 6.57 (s, 1H), 4.33 (q,  $J=7.2$ , 2H), 2.41 (s, 3H), 2.37 (s, 3H), 1.35 (t,  $J=7.2$ , 3H).  $^{13}\text{C}$  NMR (101 MHz,  $\text{CDCl}_3$ )  $\delta$  = 171.06, 166.19, 146.68, 135.26, 134.76, 134.68, 133.78, 133.72, 130.54, 127.33, 125.78, 125.73, 124.26, 123.04, 115.79, 113.12, 61.14, 21.86, 21.83, 14.42. HRMS (ESI) calcd for  $\text{C}_{22}\text{H}_{20}\text{N}_2\text{O}_5\text{S}$   $[\text{M}+\text{H}]^+$ : 425.1166. Found: 425.1172.

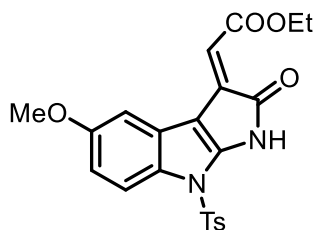

**6c**, red solid, m.p. no data(carbonized), 44mg, 50% yield,  $^1\text{H}$  NMR (400 MHz,  $\text{CDCl}_3$ )  $\delta$  = 8.21 (s, 1H), 7.88 (d,  $J=2.8$ , 1H), 7.78 (d,  $J=8.4$ , 2H), 7.73 (d,  $J=9.2$ , 1H), 7.31 (d,  $J=8.4$ , 2H), 6.77 (dd,  $J=9.2$ , 2.8, 1H), 6.59 (s, 1H), 4.33 (q,  $J=7.2$ , 2H), 3.86 (s, 3H), 2.40 (s, 3H), 1.36 (t,  $J=7.2$ , 3H).  $^{13}\text{C}$  NMR (101 MHz,  $\text{CDCl}_3$ )  $\delta$  = 170.94, 166.19, 157.94, 149.16, 146.70, 133.77, 133.66, 130.55, 129.82, 127.30, 126.90, 115.80, 114.12, 110.72, 107.05, 61.12, 55.74, 21.84, 14.41. HRMS (ESI) calcd for  $\text{C}_{22}\text{H}_{20}\text{N}_2\text{O}_6\text{S}$   $[\text{M}+\text{H}]^+$ : 441.1115. Found: 441.1131.

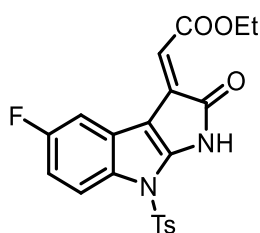

**6d**, red solid, m.p. no data(carbonized), 49mg, 58% yield,  $^1\text{H}$  NMR (400 MHz, DMSO)  $\delta$  = 11.69 (s, 1H), 8.01 (d,  $J=8.4$ , 2H), 7.91 (m, 2H), 7.48 (d,  $J=8.4$ , 2H), 7.02 (td,  $J=9.2$ , 2.6, 1H), 6.27 (s, 1H), 4.26 (q,  $J=7.2$ , 2H), 2.36 (s, 3H), 1.27 (t,  $J=7.2$ , 3H).  $^{13}\text{C}$  NMR (101 MHz, DMSO)  $\delta$  171.82, 166.05, 160.33 ( $J = 236.5$ ), 153.21, 147.50, 134.02, 133.23, 131.62, 131.23, 127.70, 126.75 ( $J = 11.7$ ), 115.12 ( $J = 9.8$ ), 113.60, 110.09 ( $J = 25.3$ ), 108.45 ( $J = 27.3$ ), 97.88, 61.24, 21.62, 14.53.  $^{19}\text{F}$  NMR (376 MHz,  $\text{CDCl}_3$ )  $\delta$  -116.9 (m). HRMS (ESI) calcd for  $\text{C}_{21}\text{H}_{17}\text{FN}_2\text{O}_5\text{S}$   $[\text{M}+\text{H}]^+$ : 429.0915. Found: 429.0915.

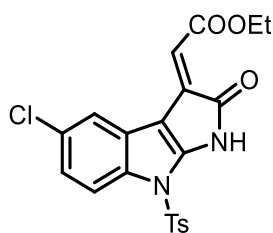

**6e**, red solid, m.p. no data(carbonized), 41mg, 46% yield,  $^1\text{H}$  NMR (400 MHz, DMSO)  $\delta$  = 11.74 (s, 1H), 8.20 (d,  $J=2.4$ , 1H), 8.01 (d,  $J=8.4$ , 2H), 7.89 (d,  $J=8.8$ , 1H), 7.49 (d,  $J=8.2$ , 2H), 7.21 (dd,  $J=8.8$ , 2.2, 1H), 6.26 (s, 1H), 4.26 (d,  $J=7.2$ , 2H), 2.36 (s, 3H), 1.27 (t,  $J=7.2$ , 3H).  $^{13}\text{C}$  NMR (101 MHz, DMSO)  $\delta$  = 171.46, 165.60, 147.16, 133.52, 133.32, 132.70, 130.83, 129.69, 127.29, 126.24, 122.29, 121.13, 114.84, 113.25, 96.94, 60.85, 21.19, 14.09. HRMS (ESI) calcd for  $\text{C}_{21}\text{H}_{17}\text{ClN}_2\text{O}_5\text{S}$   $[\text{M}+\text{H}]^+$ : 445.0619. Found: 445.0639.



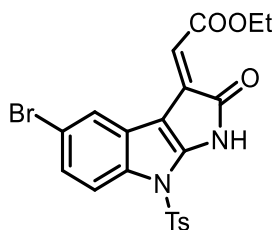

**6f**, red solid, m.p. no data(carbonized), 48mg, 49% yield,  $^1\text{H}$  NMR (400 MHz, DMSO)  $\delta$  = 11.73 (s, 1H), 8.34 (d,  $J$ =2.0, 1H), 8.00 (d,  $J$ =8.4, 2H), 7.84 (d,  $J$ =8.8, 1H), 7.48 (d,  $J$ =8.0, 2H), 7.33 (dd,  $J$ =8.8, 2.0, 1H), 6.27 (s, 1H), 4.25 (q,  $J$ =7.2, 2H), 2.35 (s, 3H), 1.26 (t,  $J$ =7.2, 3H).  $^{13}\text{C}$  NMR (101 MHz,  $\text{CDCl}_3$ )  $\delta$  = 171.39, 165.59, 147.16, 133.67, 133.47, 132.69, 130.82, 127.32, 127.29, 126.60, 125.05, 124.10, 117.97, 115.22, 113.28, 96.57, 60.86, 21.18, 14.08. HRMS (ESI) calcd for  $\text{C}_{21}\text{H}_{17}\text{BrN}_2\text{O}_5\text{S}$   $[\text{M}+\text{H}]^+$ : 489.0114. Found: 489.0108.

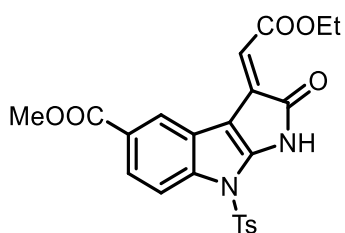

**6g**, red solid, m.p. no data(carbonized), 53mg, 56% yield,  $^1\text{H}$  NMR (400 MHz, DMSO)  $\delta$  = 11.71 (s, 1H), 8.74 (d,  $J$ =1.6, 1H), 8.09 – 7.98 (m, 3H), 7.79 (dd,  $J$ =8.4, 1.8, 1H), 7.47 (d,  $J$ =8.0, 2H), 6.30 (s, 1H), 4.29 (q,  $J$ =7.2, 2H), 3.84 (s, 3H), 2.33 (s, 3H), 1.28 (t,  $J$ =7.2, 3H).  $^{13}\text{C}$  NMR (101 MHz, DMSO)  $\delta$  = 171.47, 166.26, 165.52, 152.32, 147.22, 137.38, 133.24, 132.73, 130.84, 127.33, 126.30, 124.72, 123.67, 123.01, 113.71, 113.46, 97.19, 60.85, 52.21, 21.18, 14.07. HRMS (ESI) calcd for  $\text{C}_{23}\text{H}_{20}\text{N}_2\text{O}_7\text{S}$   $[\text{M}+\text{H}]^+$ : 469.1064. Found: 469.1070.

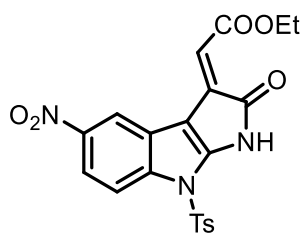

**6h**, red solid, m.p. no data(carbonized), 42mg, 47% yield,  $^1\text{H}$  NMR (400 MHz, DMSO)  $\delta$  = 11.88 (s, 1H), 9.08 (d,  $J$ =2.4, 1H), 8.17 – 7.98 (m, 4H), 7.51 (d,  $J$ =8.2, 2H), 6.33 (s, 1H), 4.30 (q,  $J$ =7.2, 2H), 2.37 (s, 3H), 1.30 (t,  $J$ =7.2, 3H).  $^{13}\text{C}$  NMR (101 MHz, DMSO)  $\delta$  = 171.21, 165.55, 153.50, 147.52, 144.85, 137.84, 133.20, 132.54, 130.93, 127.47, 125.09, 117.71, 116.96, 114.02, 113.93, 96.98, 60.99, 21.20, 14.07. HRMS (ESI) calcd for  $\text{C}_{21}\text{H}_{17}\text{N}_3\text{O}_7\text{S}$   $[\text{M}+\text{H}]^+$ : 456.0860. Found: 456.0859.

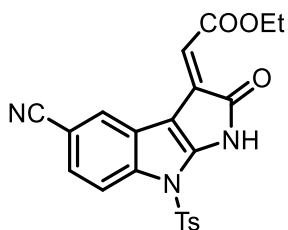

**6i**, red solid, m.p. no data(carbonized), 38mg, 44% yield,  $^1\text{H}$  NMR (400 MHz, DMSO)  $\delta$  = 11.84 (s, 1H), 8.53 (d,  $J$ =1.2, 1H), 8.07 (m, 3H), 7.61 (dd,  $J$ =8.4, 1.6, 1H), 7.50 (d,  $J$ =8.4, 2H), 6.30 (s, 1H), 4.28 (q,  $J$ =7.2, 2H), 2.37 (s, 3H), 1.29 (t,  $J$ =7.2, 3H).  $^{13}\text{C}$  NMR (101 MHz, DMSO)  $\delta$  = 171.70, 166.04, 153.40, 147.87, 137.23, 133.78, 133.08, 131.35, 127.88, 126.41, 125.89, 125.49, 119.76, 114.91, 114.21, 107.93, 96.99, 61.41, 21.64, 14.52. HRMS (ESI) calcd for  $\text{C}_{22}\text{H}_{17}\text{N}_3\text{O}_5\text{S}$   $[\text{M}+\text{H}]^+$ : 436.0962. Found: 436.0963.

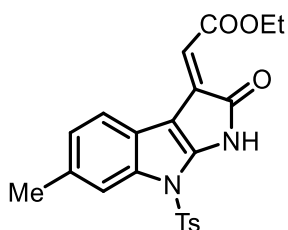

**6j**, red solid, m.p. no data(carbonized), 40mg, 47% yield,  $^1\text{H}$  NMR (400 MHz, DMSO)  $\delta$  = 11.48 (s, 1H), 8.02 (d,  $J$ =8.4, 3H), 7.71 (s, 1H), 7.47 (d,  $J$ =8.4, 2H), 7.08 (d,  $J$ =8.0, 1H), 6.24 (s, 1H), 4.24 (q,  $J$ =7.2, 2H), 2.40 (s, 3H), 2.35 (s, 3H), 1.26 (t,  $J$ =7.2, 3H).  $^{13}\text{C}$  NMR (101 MHz, DMSO)  $\delta$  = 171.63, 165.52, 151.04, 146.76, 135.17, 133.70, 132.99, 132.30, 130.68, 127.15, 125.99, 122.33, 121.49, 113.56, 112.57, 97.60, 60.56, 21.19, 21.11, 14.09. HRMS (ESI) calcd for  $\text{C}_{22}\text{H}_{20}\text{N}_2\text{O}_5\text{S}$   $[\text{M}+\text{H}]^+$ : 425.1166. Found: 425.1156.

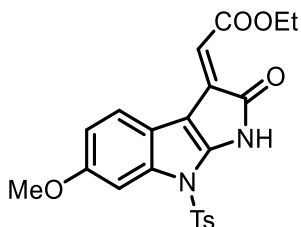

**6k**, red solid, m.p. no data(carbonized), 42mg, 48% yield,  $^1\text{H}$  NMR (400 MHz,  $\text{CDCl}_3$ )  $\delta$  = 8.14 (m, 2H), 7.78 (d,  $J$ =8.4, 2H), 7.41 (d,  $J$ =2.4, 1H), 7.29 (d,  $J$ =8.0, 2H), 6.88 (dd,  $J$ =8.0, 2.4, 1H), 6.55 (s, 1H), 4.30 (q,  $J$ =7.2, 2H), 3.85 (s, 3H), 2.39 (s, 3H), 1.34 (t,  $J$ =7.2, 3H).  $^{13}\text{C}$  NMR (101 MHz,  $\text{CDCl}_3$ )  $\delta$  = 170.74, 161.99, 156.42, 147.72, 144.02, 136.49, 136.19, 130.30, 129.77, 127.05, 126.99, 122.46, 114.79, 112.02, 99.23, 55.38, 29.32, 21.45, 14.06. HRMS (ESI) calcd for  $\text{C}_{22}\text{H}_{20}\text{N}_2\text{O}_6\text{S}$   $[\text{M}+\text{H}]^+$ : 441.1115. Found: 441.1118.

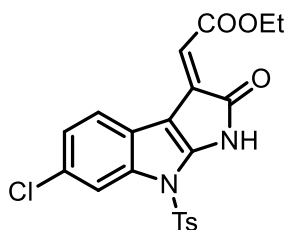

**6l**, red solid, m.p. no data(carbonized), 44mg, 50% yield,  $^1\text{H}$  NMR (400 MHz, DMSO)  $\delta$  = 11.69 (s, 1H), 8.15 (d,  $J=8.8$ , 1H), 8.05 (d,  $J=8.0$ , 2H), 7.86 (d,  $J=1.6$ , 1H), 7.51 (d,  $J=8.4$ , 2H), 7.34 (dd,  $J=8.8$ , 2.0, 1H), 6.28 (s, 1H), 4.25 (q,  $J=7.2$ , 2H), 2.37 (s, 3H), 1.27 (t,  $J=7.2$ , 3H).  $^{13}\text{C}$  NMR (101 MHz, DMSO)  $\delta$  = 171.36, 165.48, 151.92, 147.16, 135.09, 133.47, 132.71, 130.85, 127.23, 126.95, 125.10, 123.64, 122.83, 113.30, 113.09, 97.05, 60.71, 21.15, 14.06. HRMS (ESI) calcd for  $\text{C}_{21}\text{H}_{17}\text{ClN}_2\text{O}_5\text{S}$   $[\text{M}+\text{H}]^+$ : 445.0619. Found: 445.0613.

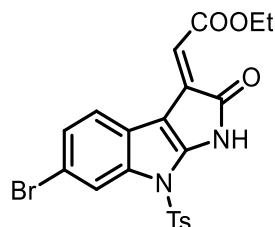

**6m**, red solid, m.p. no data(carbonized), 50mg, 51% yield,  $^1\text{H}$  NMR (400 MHz, DMSO)  $\delta$  = 11.70 (s, 1H), 8.10 (d,  $J=8.8$ , 1H), 8.03 (d,  $J=8.0$ , 2H), 7.98 (s, 1H), 7.51 (d,  $J=8.4$ , 2H), 7.46 (d,  $J=8.4$ , 1H), 6.28 (s, 1H), 4.25 (q,  $J=7.2$ , 2H), 2.37 (s, 3H), 1.24 (t,  $J=7.2$ , 2H).  $^{13}\text{C}$  NMR (101 MHz, DMSO)  $\delta$  = 171.38, 165.48, 151.85, 147.18, 135.37, 133.48, 132.71, 130.87, 127.87, 127.21, 123.96, 123.25, 115.78, 114.70, 113.35, 97.09, 60.72, 21.16, 14.07. HRMS (ESI) calcd for  $\text{C}_{21}\text{H}_{17}\text{BrN}_2\text{O}_5\text{S}$   $[\text{M}+\text{H}]^+$ : 489.0114. Found: 489.0107.

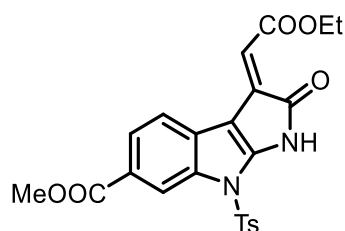

**6n**, red solid, m.p. no data(carbonized). 50mg, 53% yield,  $^1\text{H}$  NMR (400 MHz, DMSO)  $\delta$  = 11.89 (s, 1H), 8.44 (d,  $J=1.2$ , 1H), 8.20 (d,  $J=8.4$ , 1H), 7.96 (d,  $J=8.4$ , 2H), 7.85 (dd,  $J=8.4$ , 1.6, 1H), 7.51 (d,  $J=8.0$ , 2H), 6.32 (s, 1H), 4.27 (q,  $J=7.2$ , 2H), 3.95 – 3.83 (s, 3H), 2.35 (d,  $J=5.5$ , 4H), 1.32 (t,  $J=7.2$ , 3H).  $^{13}\text{C}$  NMR (101 MHz, DMSO)  $\delta$  = 171.81, 166.46, 165.86, 154.12, 147.64, 134.81, 133.71, 133.17, 131.35, 129.13, 127.48, 126.32, 123.74, 121.74, 114.54, 114.34, 97.89, 61.25, 52.68, 21.59, 14.51. HRMS (ESI) calcd for  $\text{C}_{23}\text{H}_{20}\text{N}_2\text{O}_7\text{S}$   $[\text{M}+\text{H}]^+$ : 469.1064. Found: 469.1076.

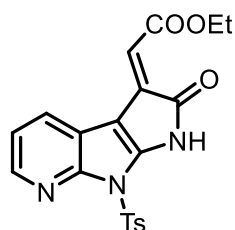

**6o**, orange solid, m.p. no data(carbonized). 21mg, 26% yield,  $^1\text{H}$  NMR (400 MHz,  $\text{CDCl}_3$ )  $\delta$  = 8.58 (dd,  $J=8.0$ , 1.2, 1H), 8.36 (s, 1H), 8.18 (dd,  $J=4.8$ , 1.2, 1H), 8.10 (d,  $J=8.4$ , 2H), 7.33 (d,  $J=8.4$ , 2H), 7.20 (dd,  $J=8.0$ , 4.8, 1H), 6.57 (s, 1H), 4.31 (q,  $J=7.2$ , 2H), 2.41 (s, 2H), 1.35 (t,  $J=7.2$ , 3H).  $^{13}\text{C}$  NMR (101 MHz,  $\text{CDCl}_3$ )  $\delta$  169.82, 166.01, 148.43, 147.99, 146.72, 141.97, 133.75, 133.56, 130.48, 130.00, 128.54, 120.72, 118.92, 115.49, 61.00, 21.74, 14.22. HRMS (ESI) calcd for  $\text{C}_{20}\text{H}_{17}\text{N}_3\text{O}_5\text{S}$   $[\text{M}+\text{H}]^+$ : 412.0962,

Found: 412.0958.

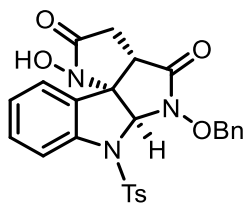

**7**, white solid, m.p. = 178.2-180.4 °C. 39mg, 80% yield, <sup>1</sup>H NMR (400 MHz, CDCl<sub>3</sub>) δ 7.71 (d, *J* = 7.8 Hz, 2H), 7.61 (d, *J* = 3.8 Hz, 2H), 7.55 (d, *J* = 7.4 Hz, 1H), 7.35 (s, 4H), 7.08 (d, *J* = 7.8 Hz, 4H), 6.14 (s, 1H), 5.30 (d, *J* = 8.6 Hz, 1H), 5.19 (d, *J* = 8.6 Hz, 1H), 2.99 (d, *J* = 10.8 Hz, 1H), 2.93 – 2.82 (m, 1H), 2.60 (d, *J* = 17.2 Hz, 1H), 2.22 (s, 3H). <sup>13</sup>C NMR (101 MHz, CDCl<sub>3</sub>) δ 168.09, 167.66, 144.85, 141.37, 133.82, 131.43, 130.34, 129.67, 129.06, 128.43, 128.15, 128.05, 125.67, 124.01, 116.61, 79.81, 78.31, 70.47, 40.49, 29.21, 21.48, 0.99. HRMS (ESI) calcd for C<sub>26</sub>H<sub>24</sub>N<sub>3</sub>O<sub>6</sub>S [M+H]<sup>+</sup>: 506.1386. Found: 506.1311.

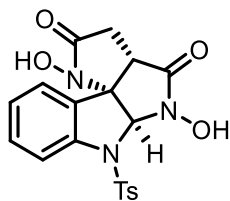

**8**, white solid, m.p. = 202.4-204.1 °C. 30mg, 77% yield, <sup>1</sup>H NMR (400 MHz, DMSO) δ 10.23 (s, 1H), 9.58 (s, 1H), 7.74 (d, *J* = 7.8 Hz, 2H), 7.41 (dd, *J* = 22.0, 7.8 Hz, 3H), 7.30 (d, *J* = 7.8 Hz, 2H), 7.18 (t, *J* = 7.2 Hz, 1H), 5.99 (s, 1H), 3.19 (dd, *J* = 11.2, 3.8 Hz, 1H), 2.93 (dd, *J* = 16.8, 11.6 Hz, 1H), 2.32 (s, 3H). <sup>13</sup>C NMR (101 MHz, DMSO) δ 167.75, 166.78, 144.90, 141.12, 134.55, 133.62, 131.43, 130.18, 130.09, 128.43, 125.85, 125.65, 115.95, 81.41, 69.36, 29.48, 21.48. HRMS (ESI) calcd for C<sub>19</sub>H<sub>18</sub>N<sub>3</sub>O<sub>6</sub>S [M+H]<sup>+</sup>: 416.0916. Found: 416.0970.

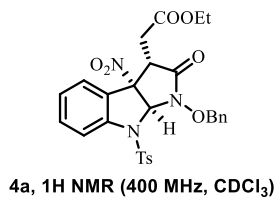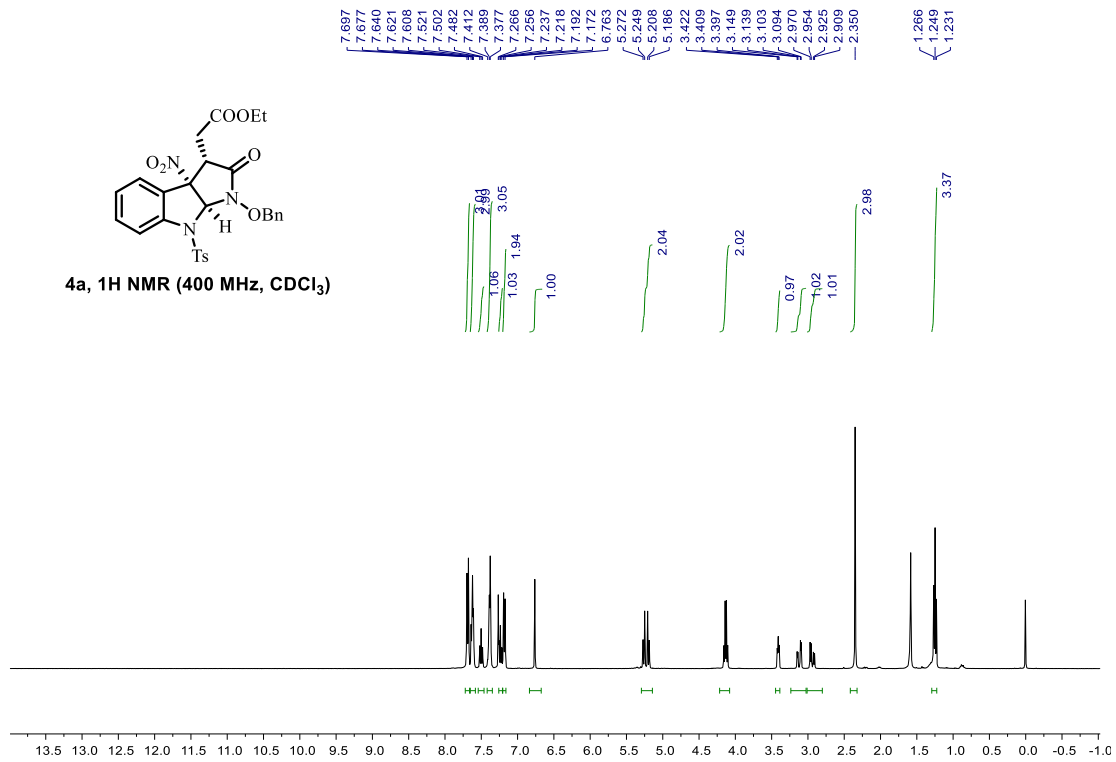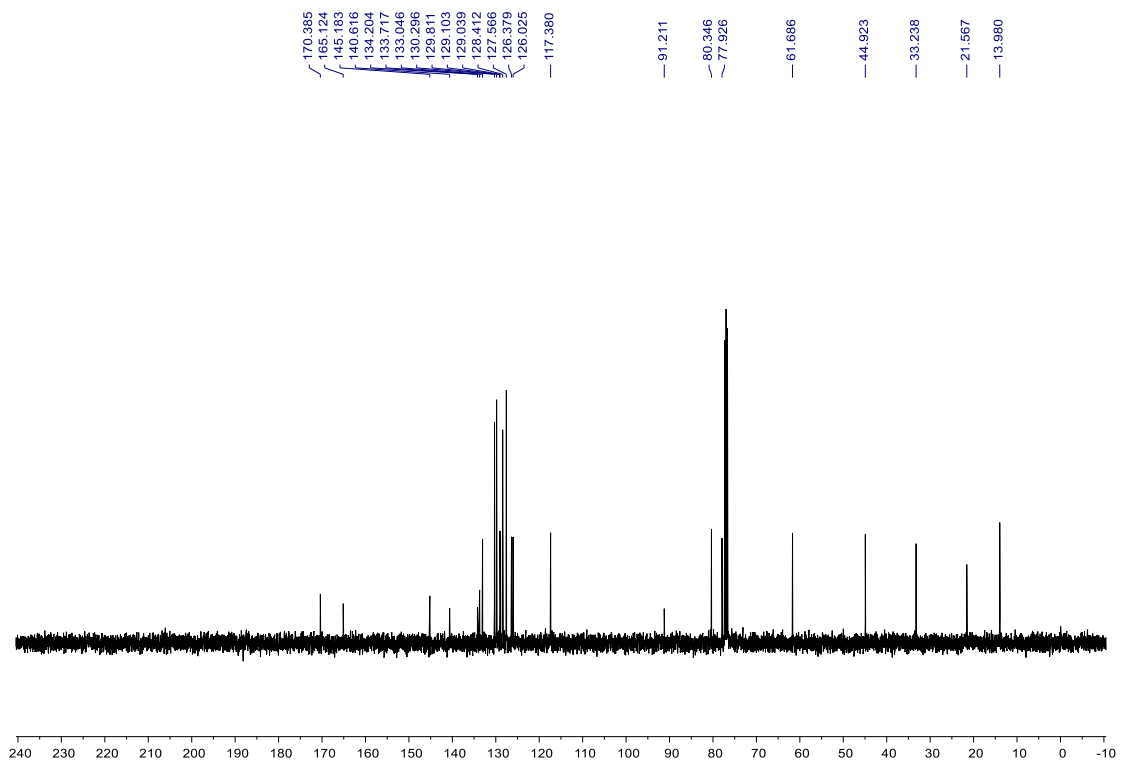

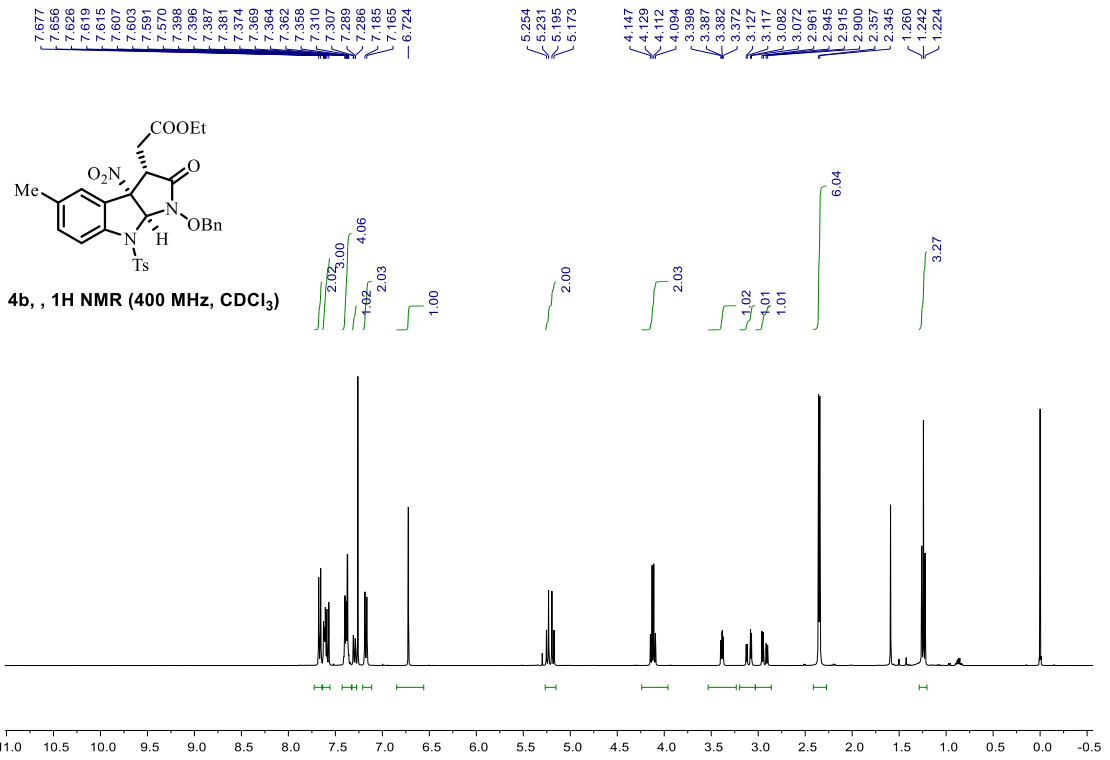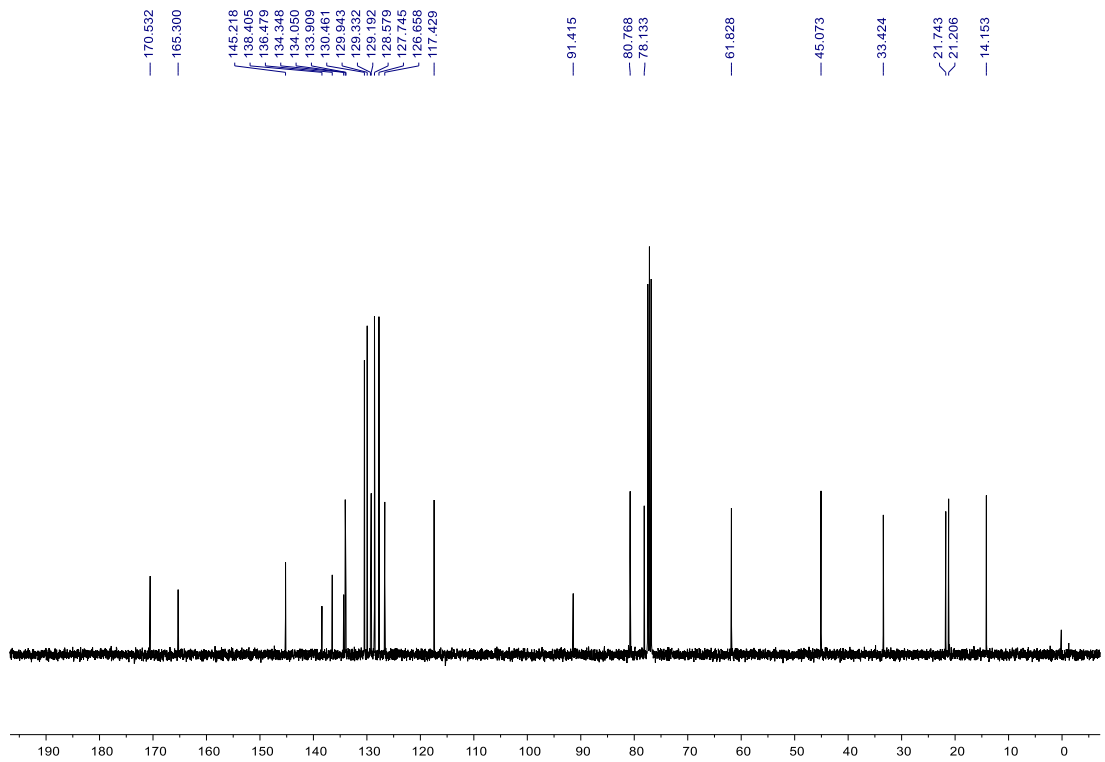

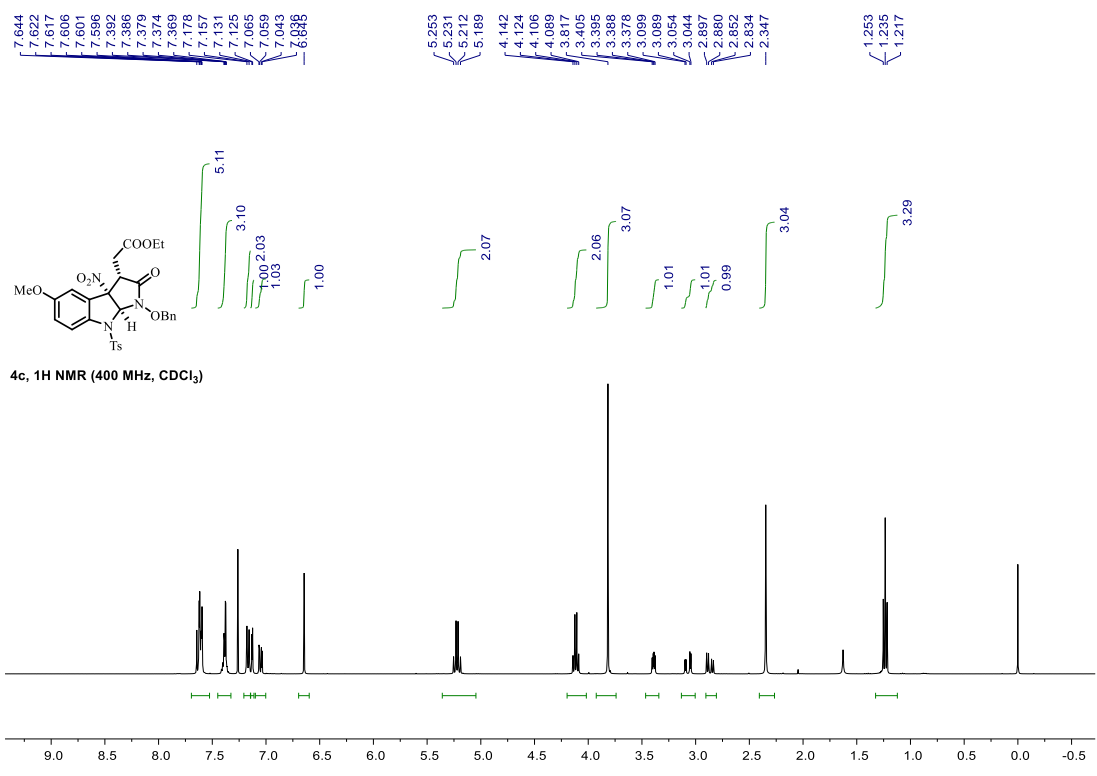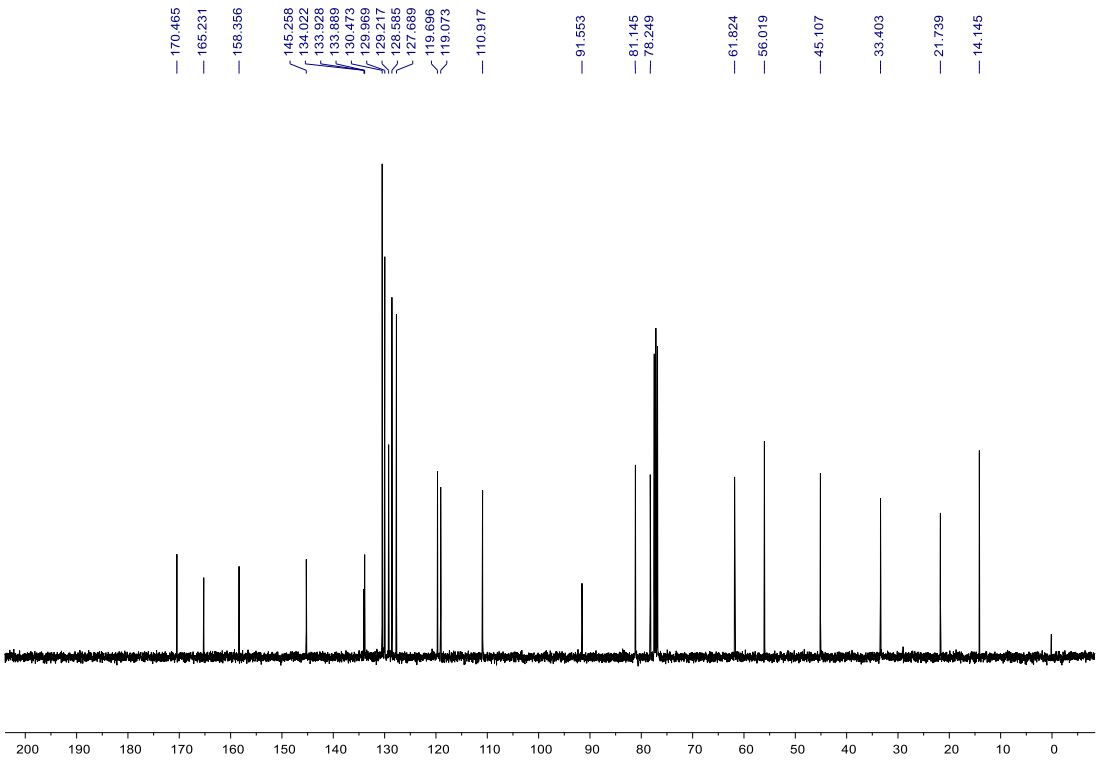

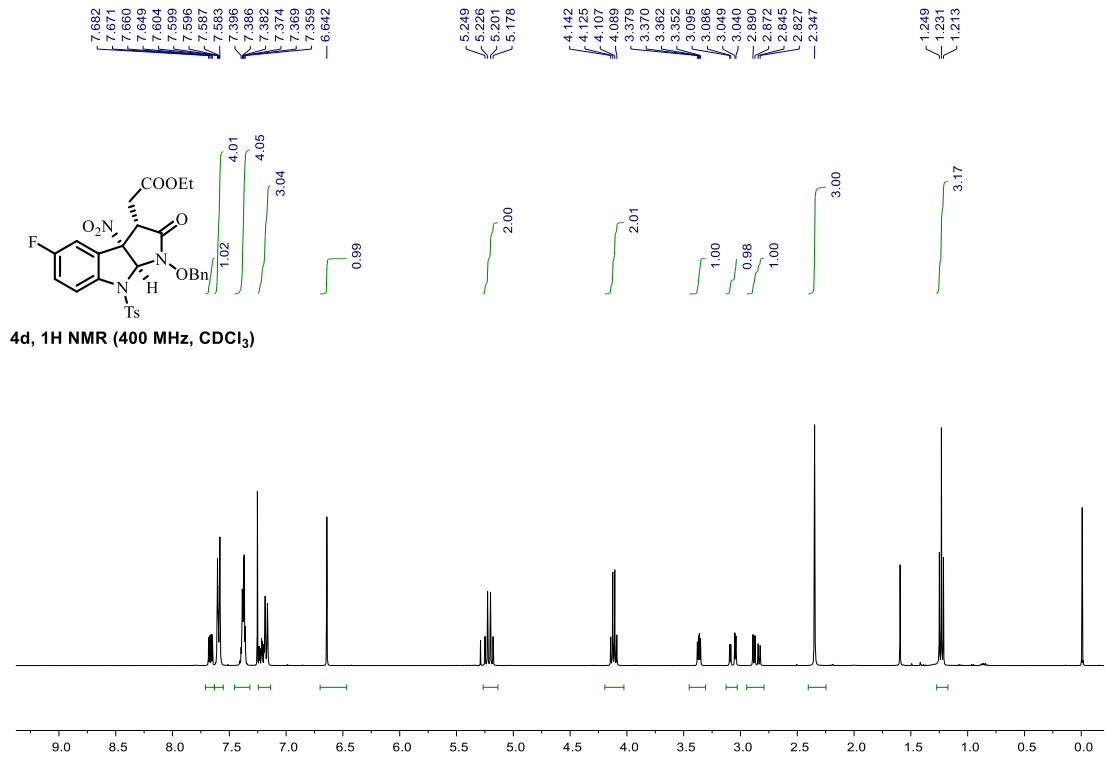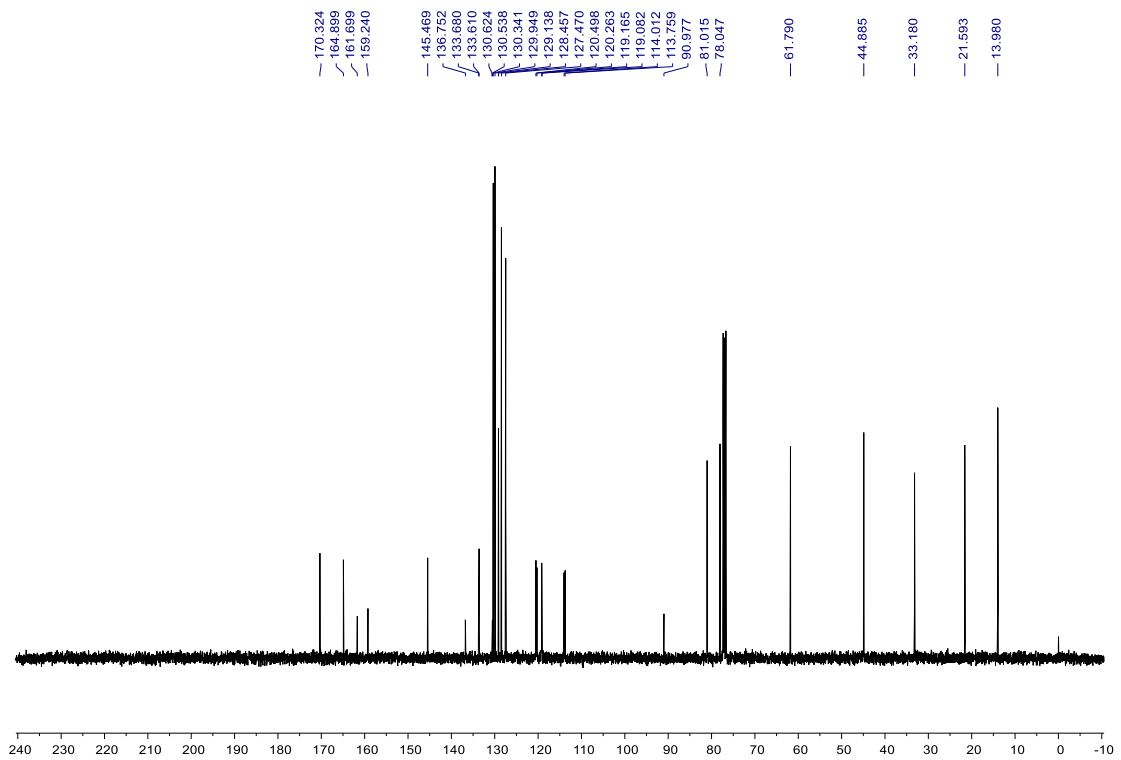



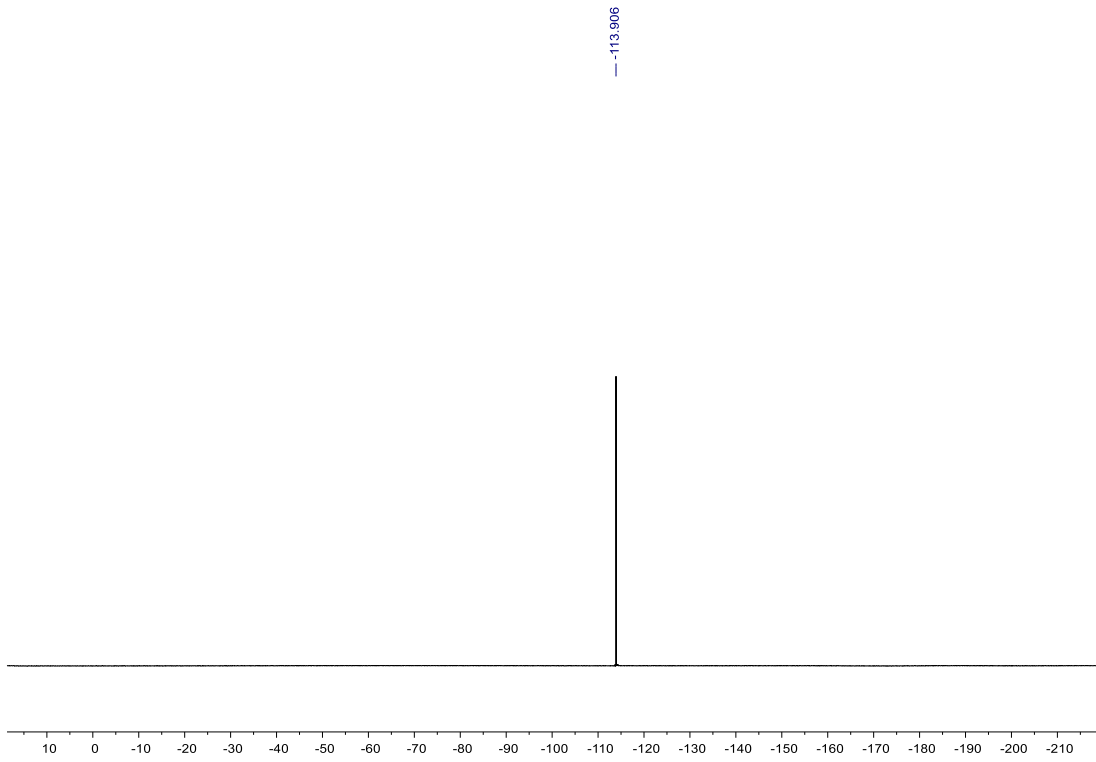

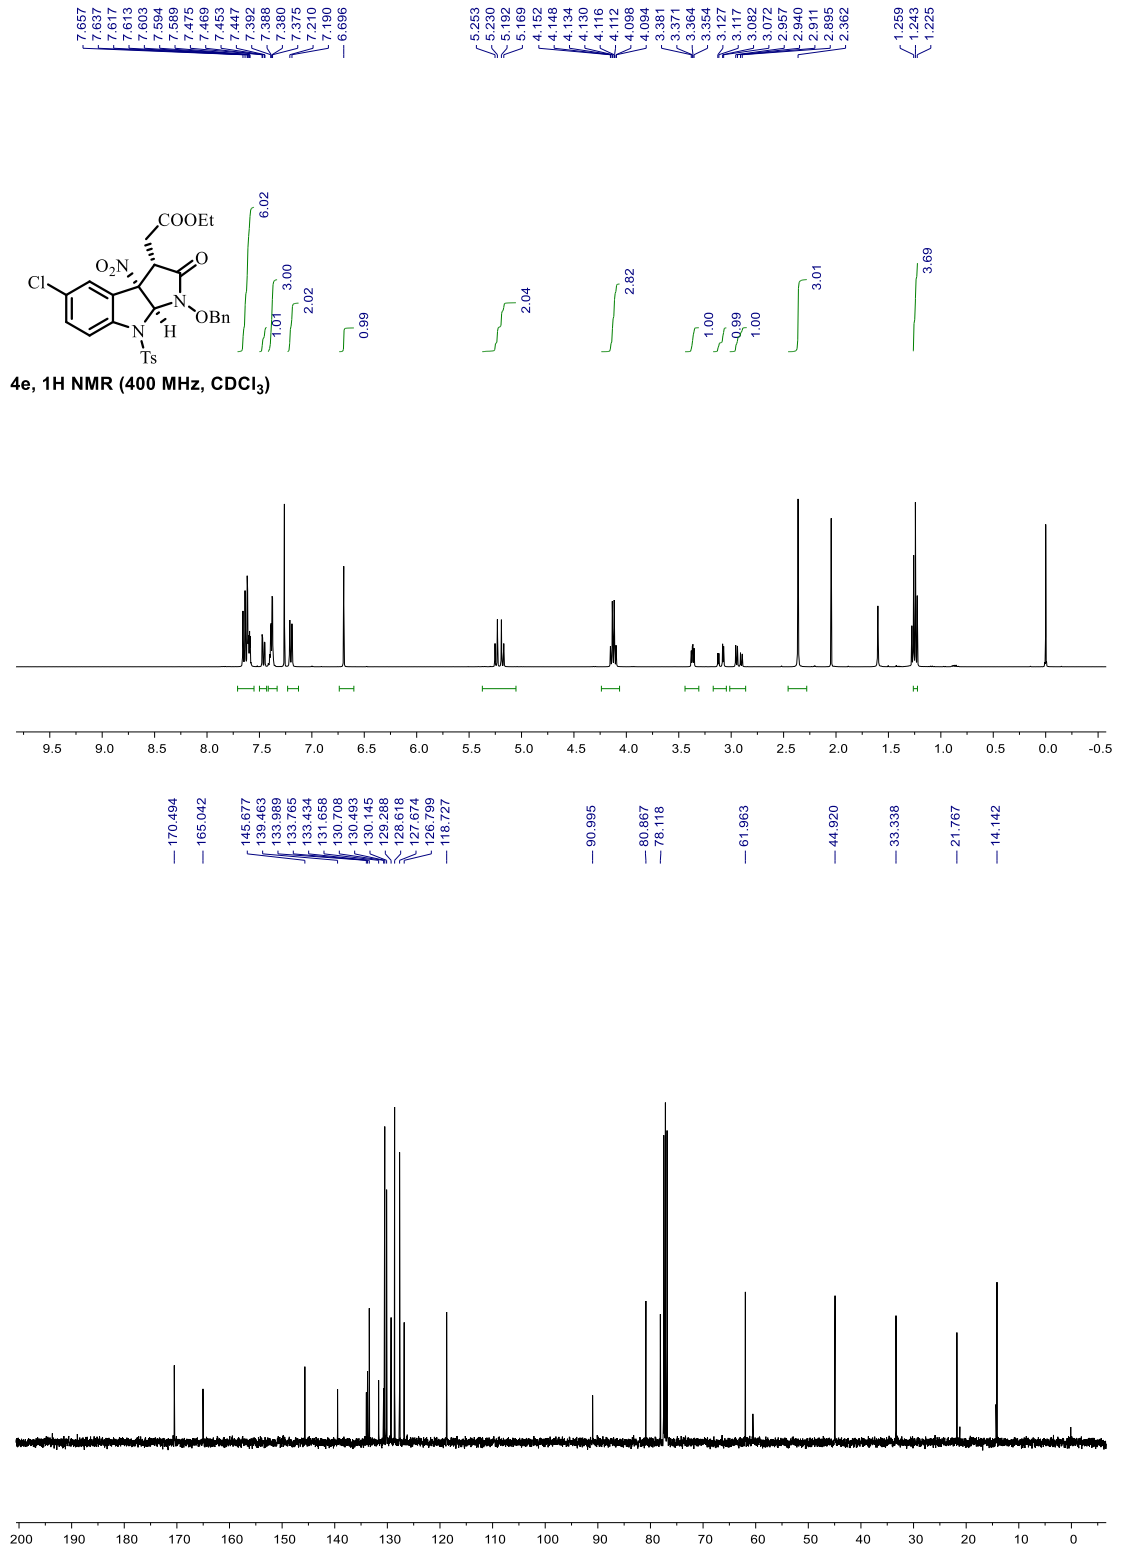

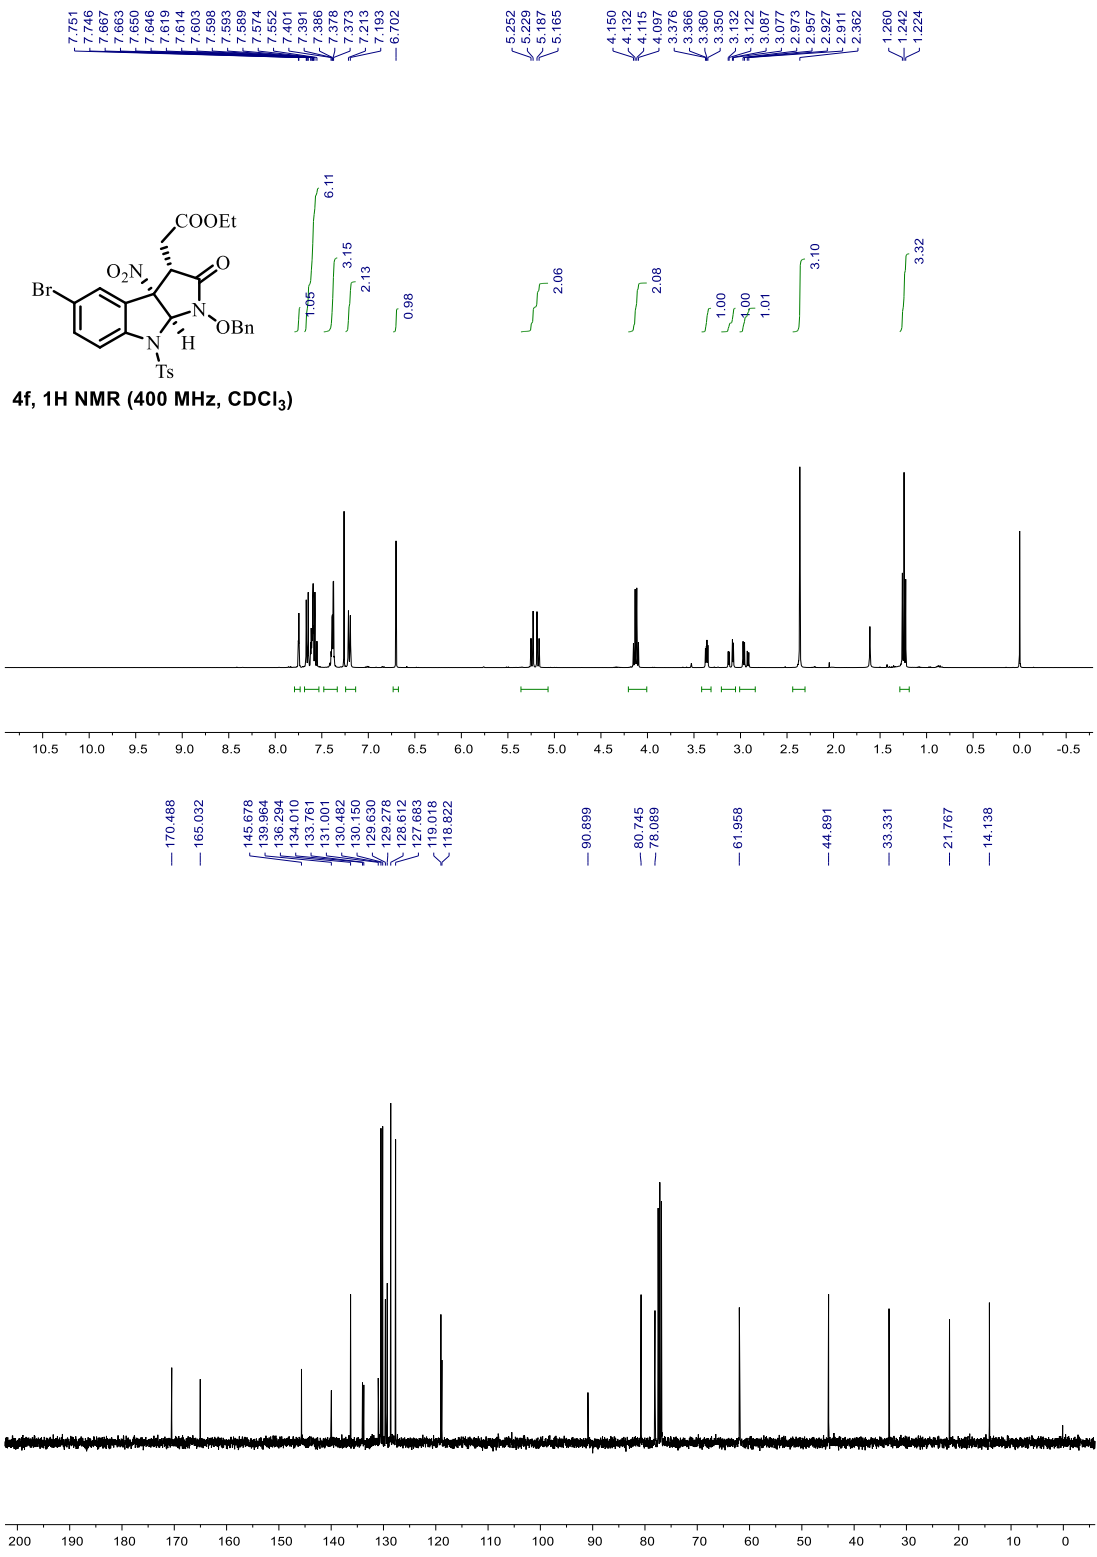

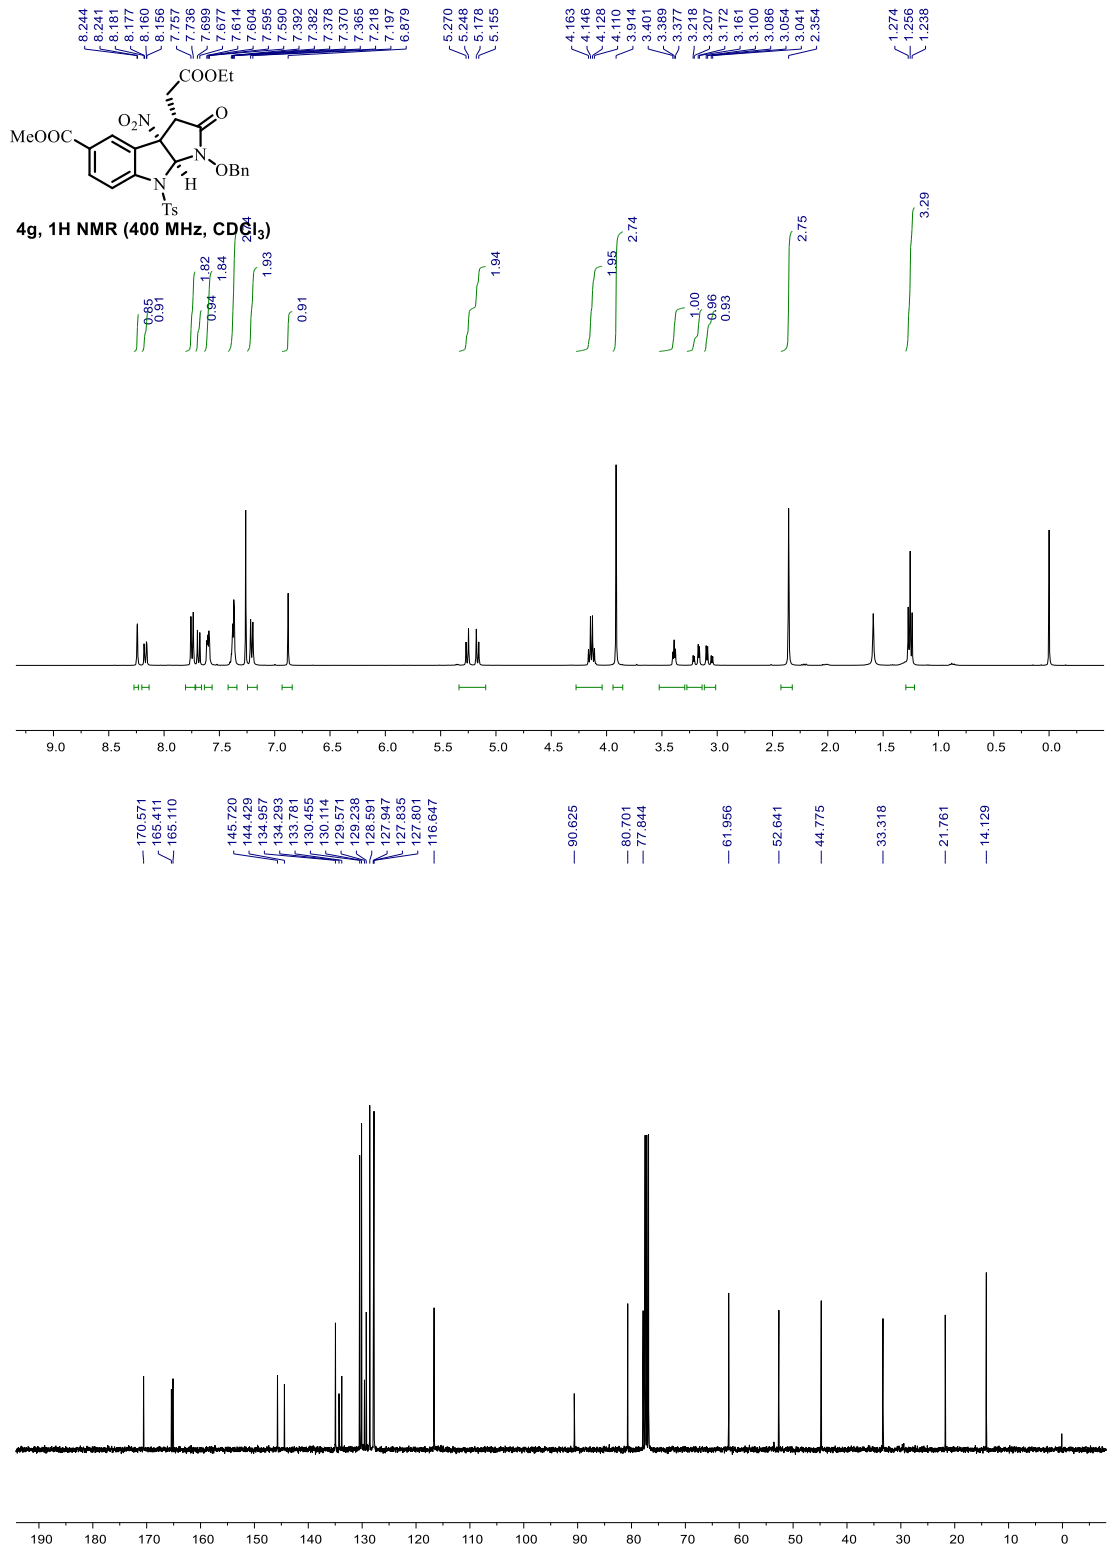

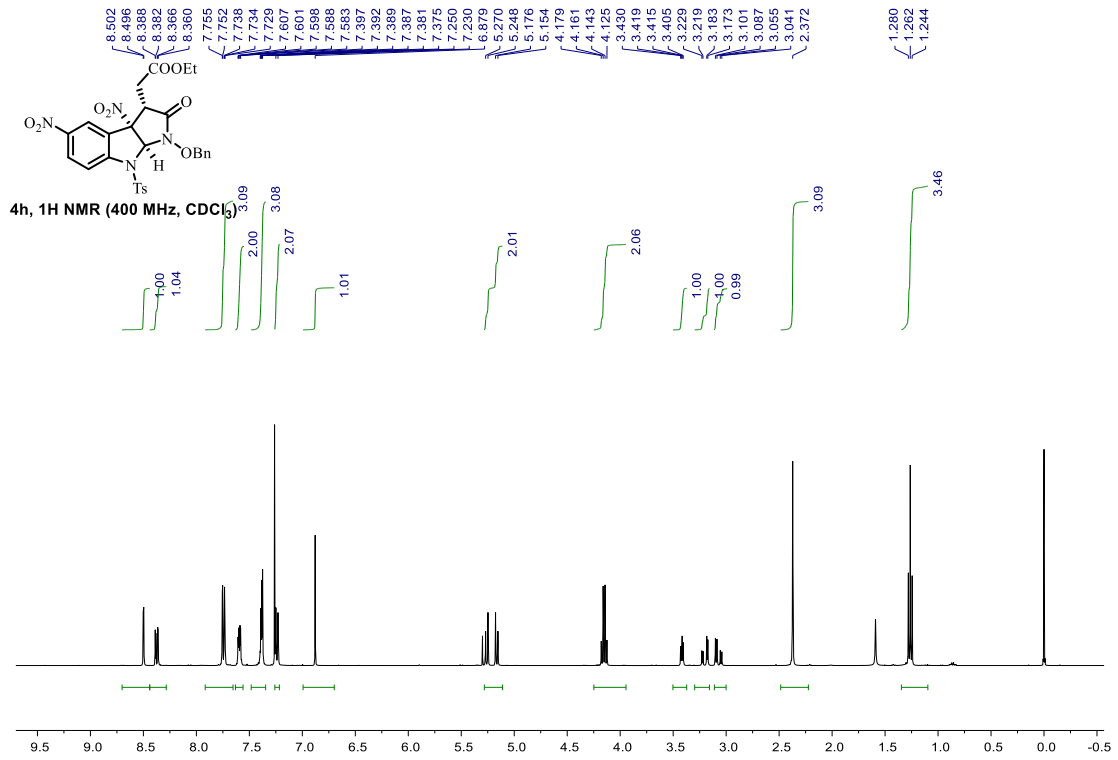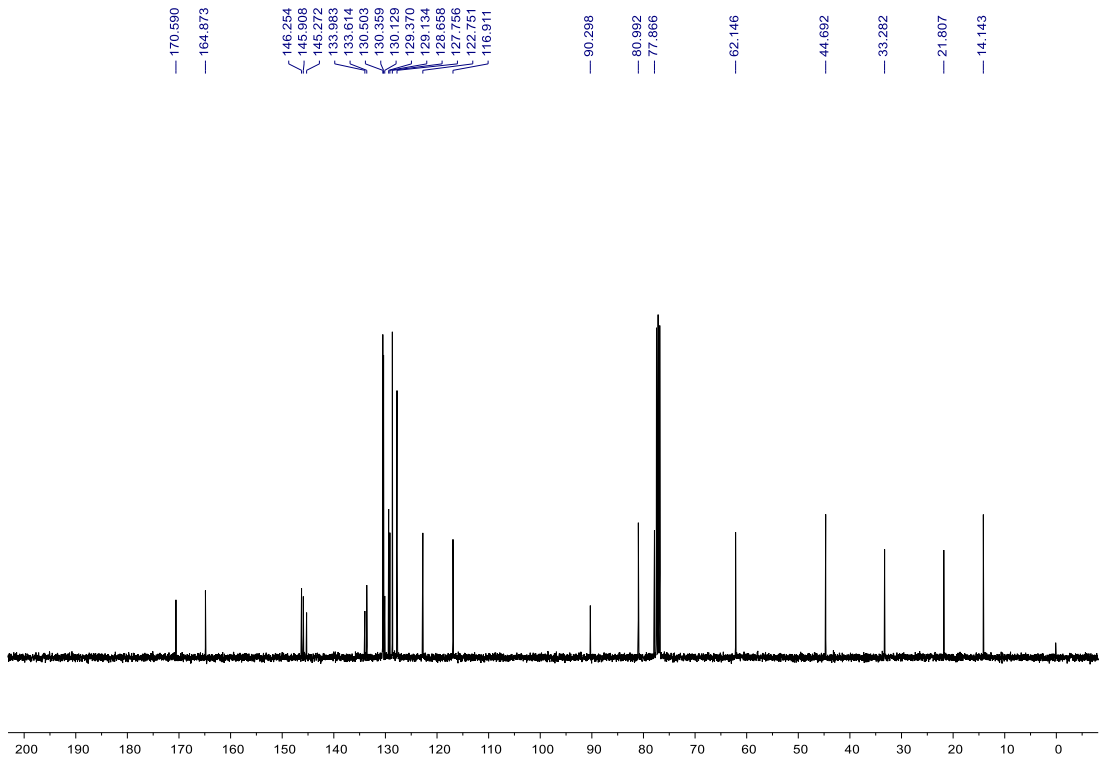

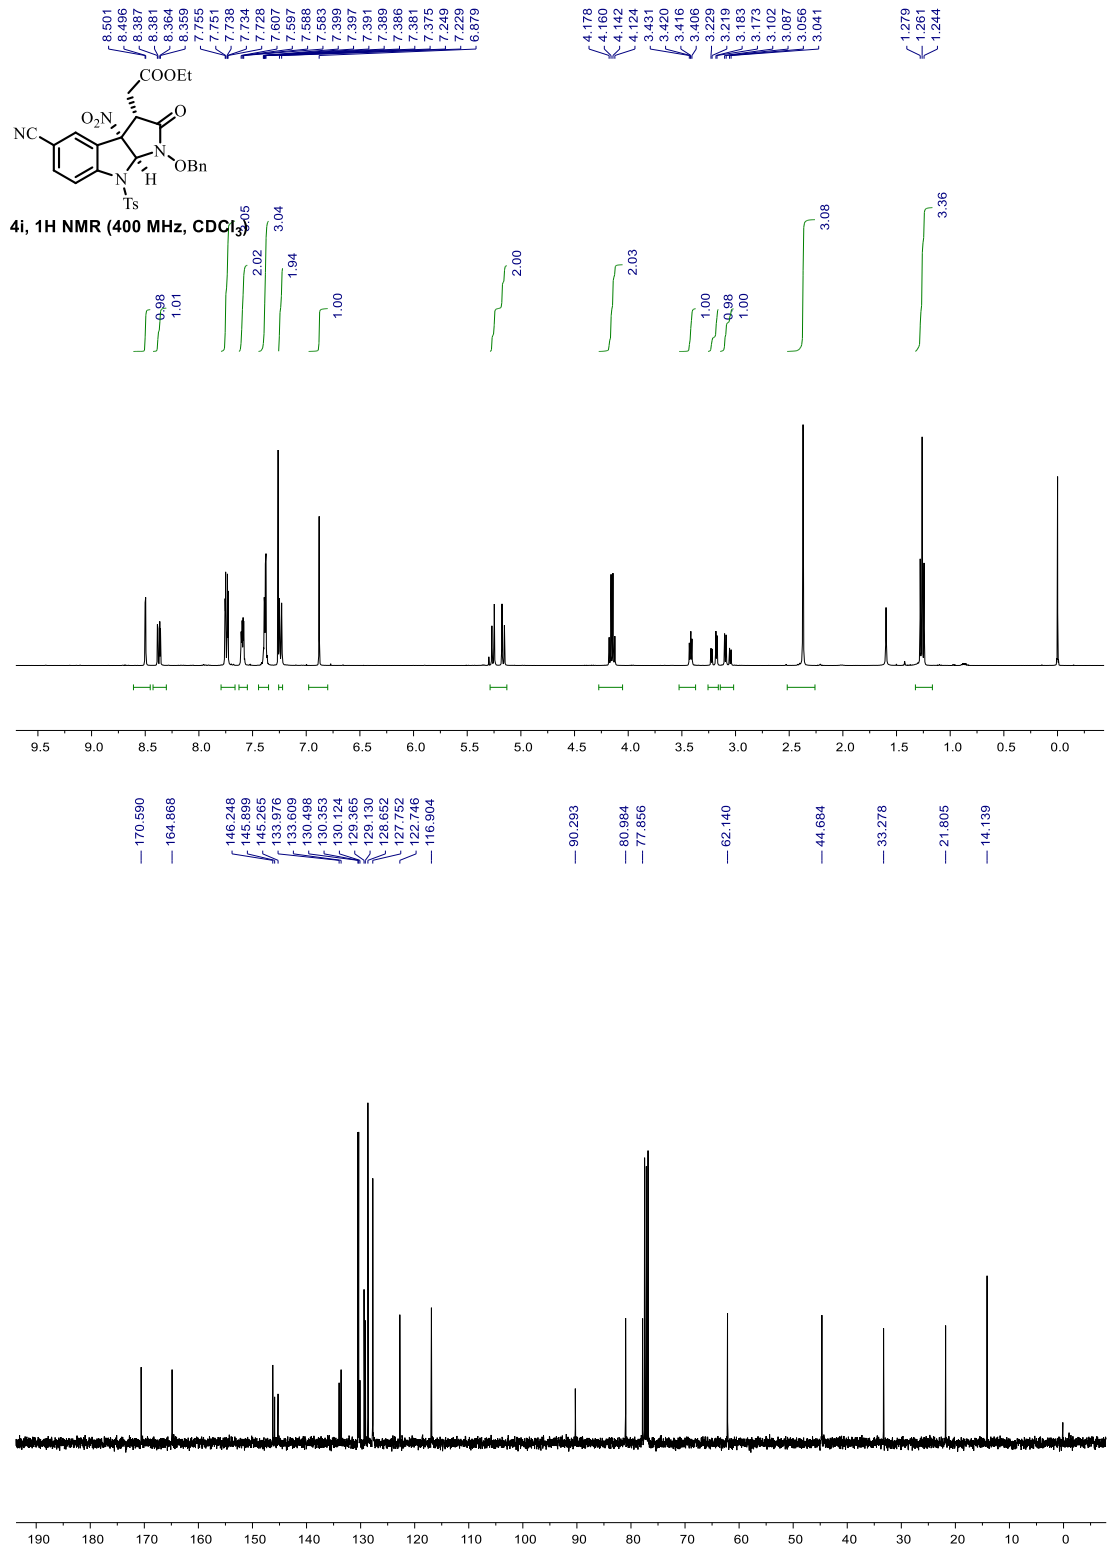

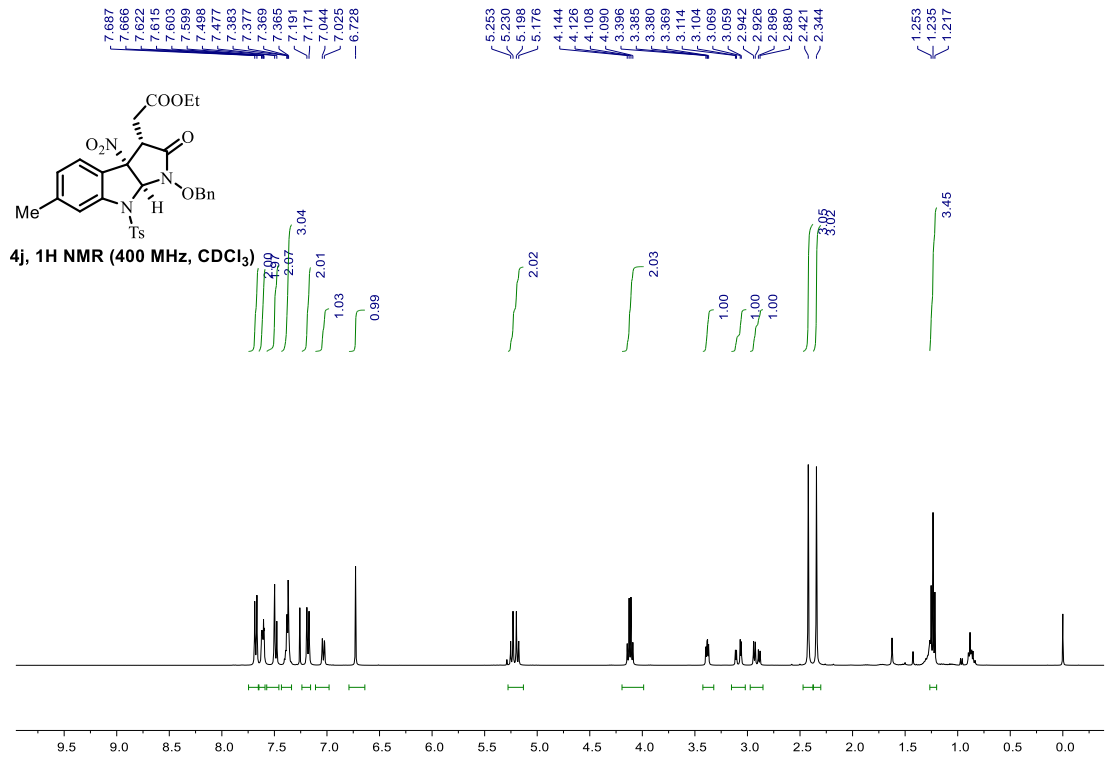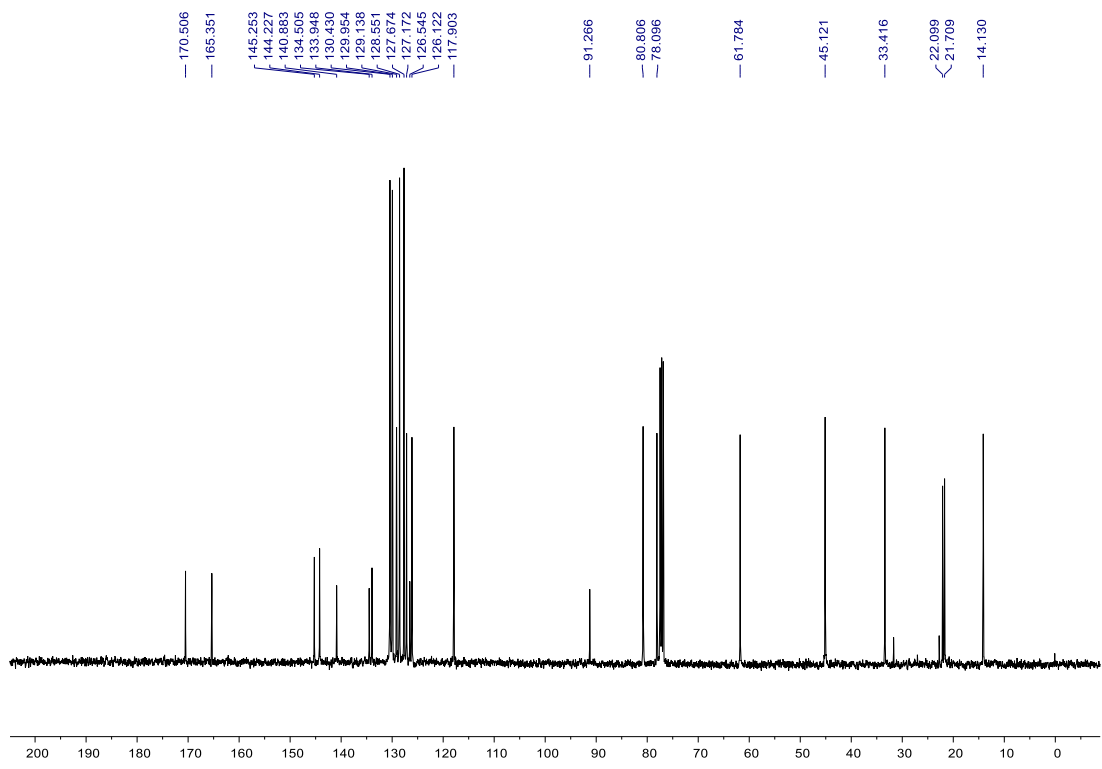

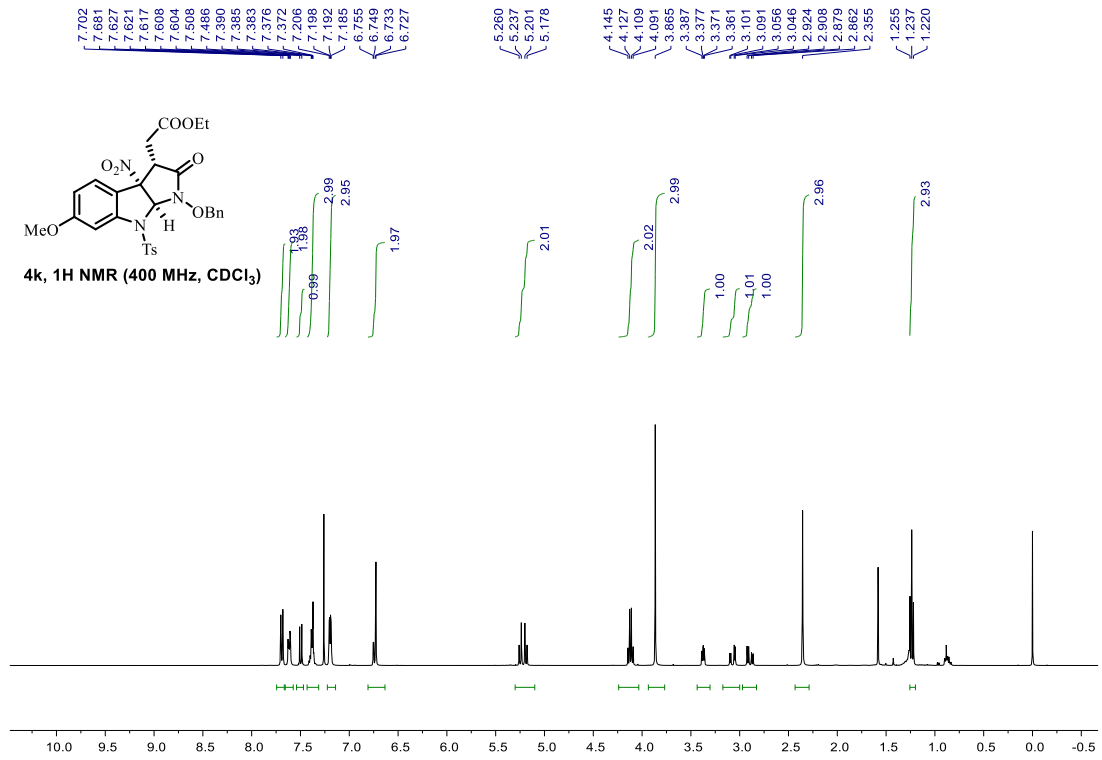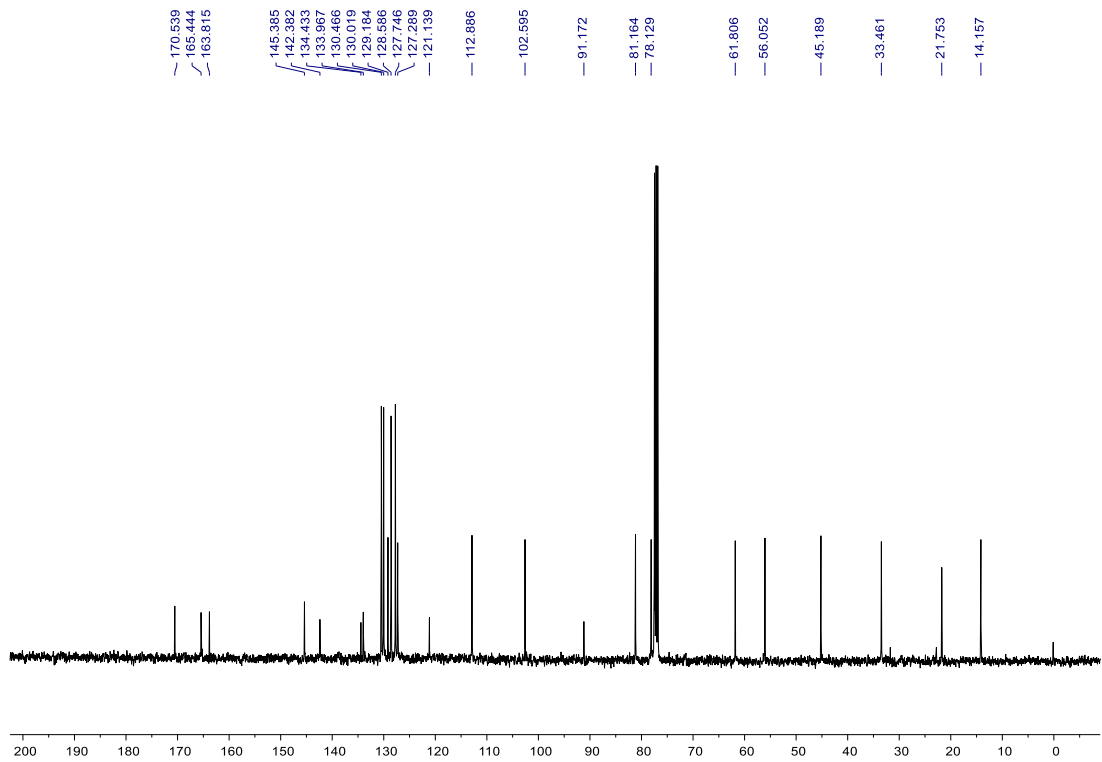



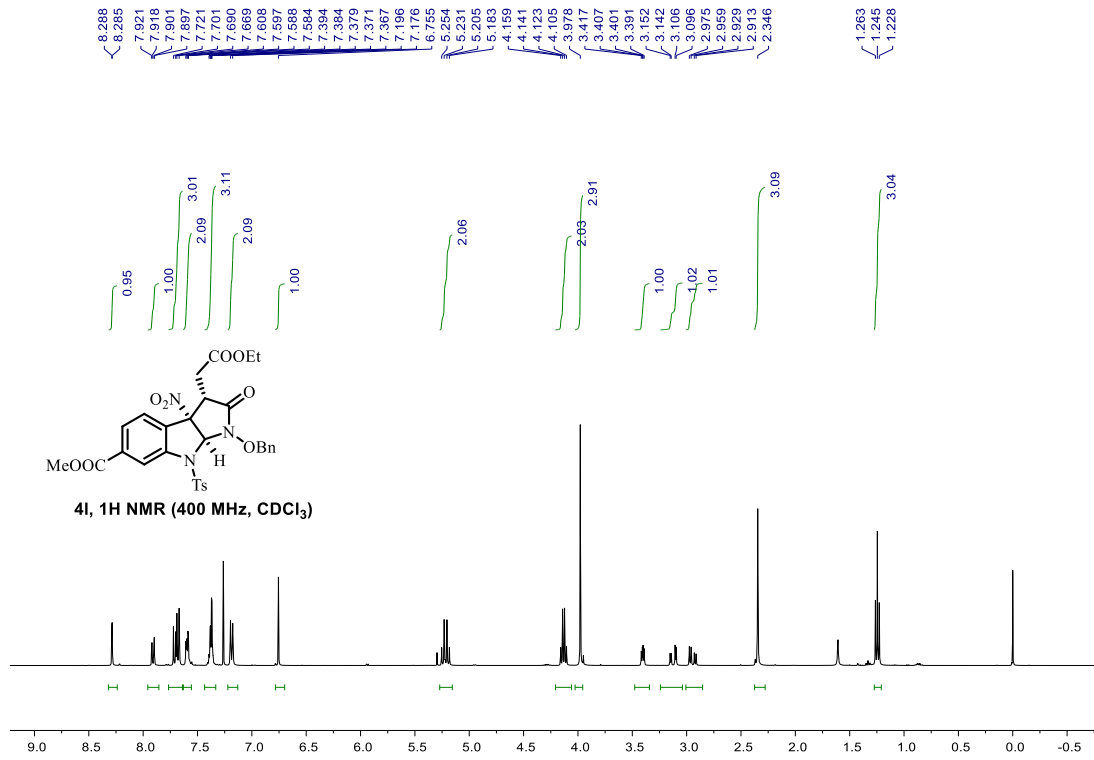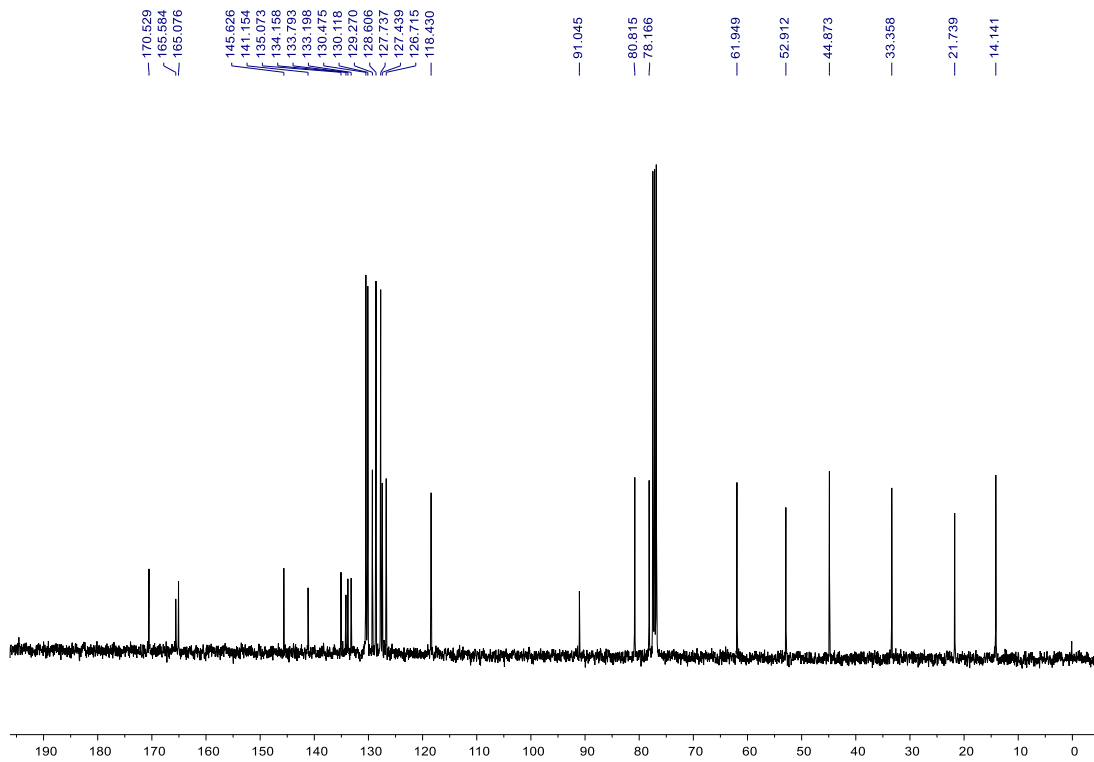

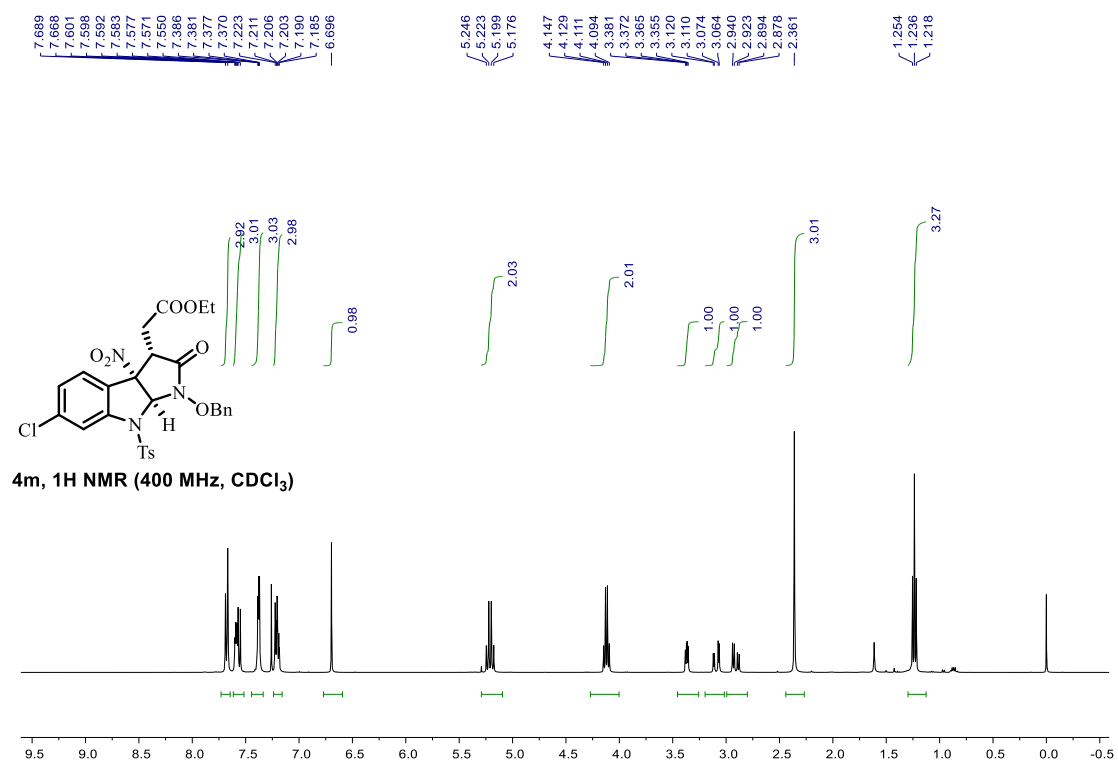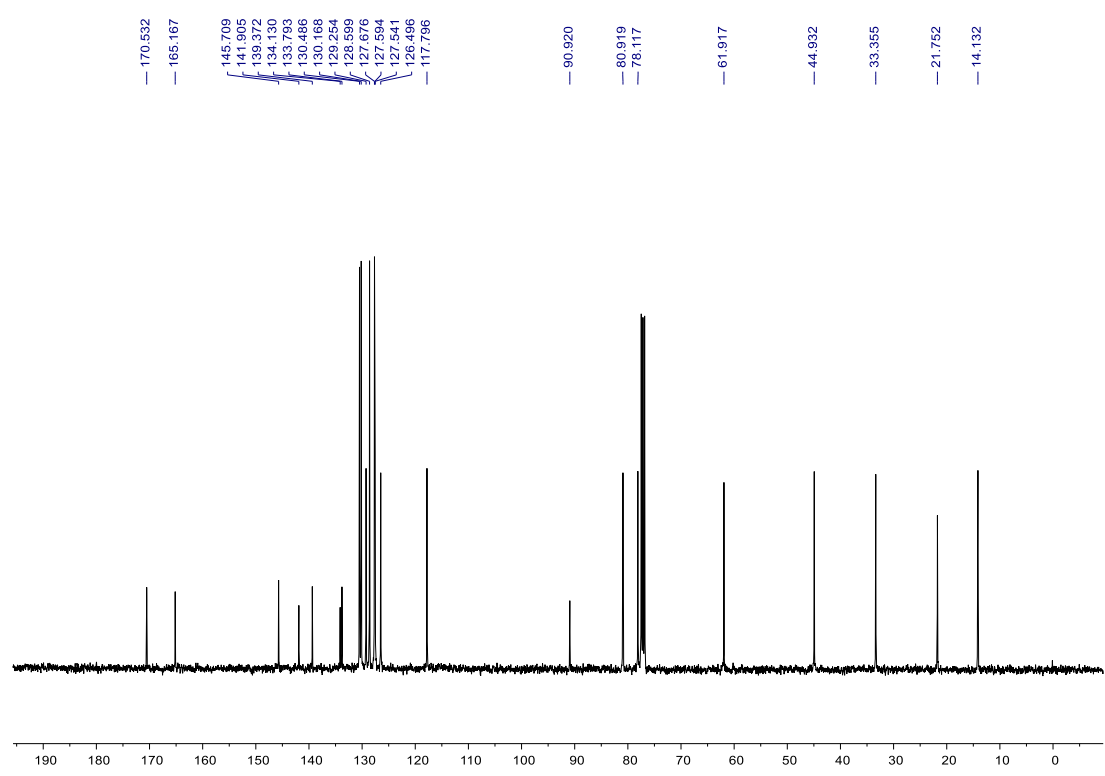

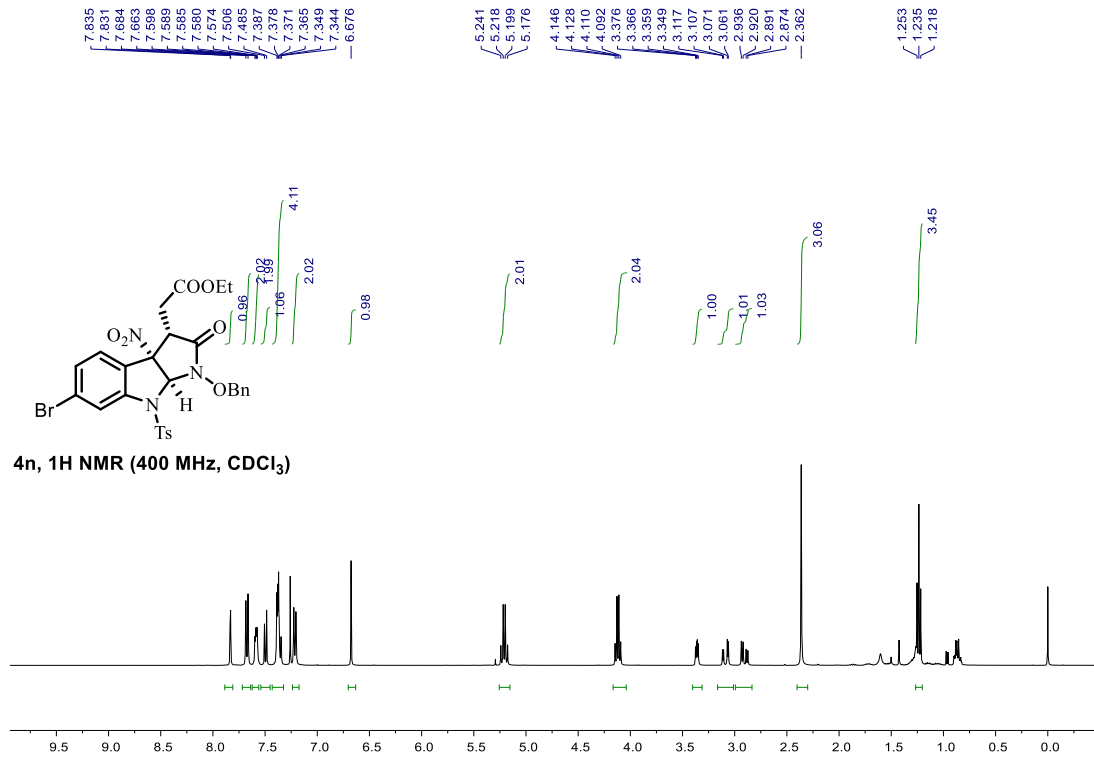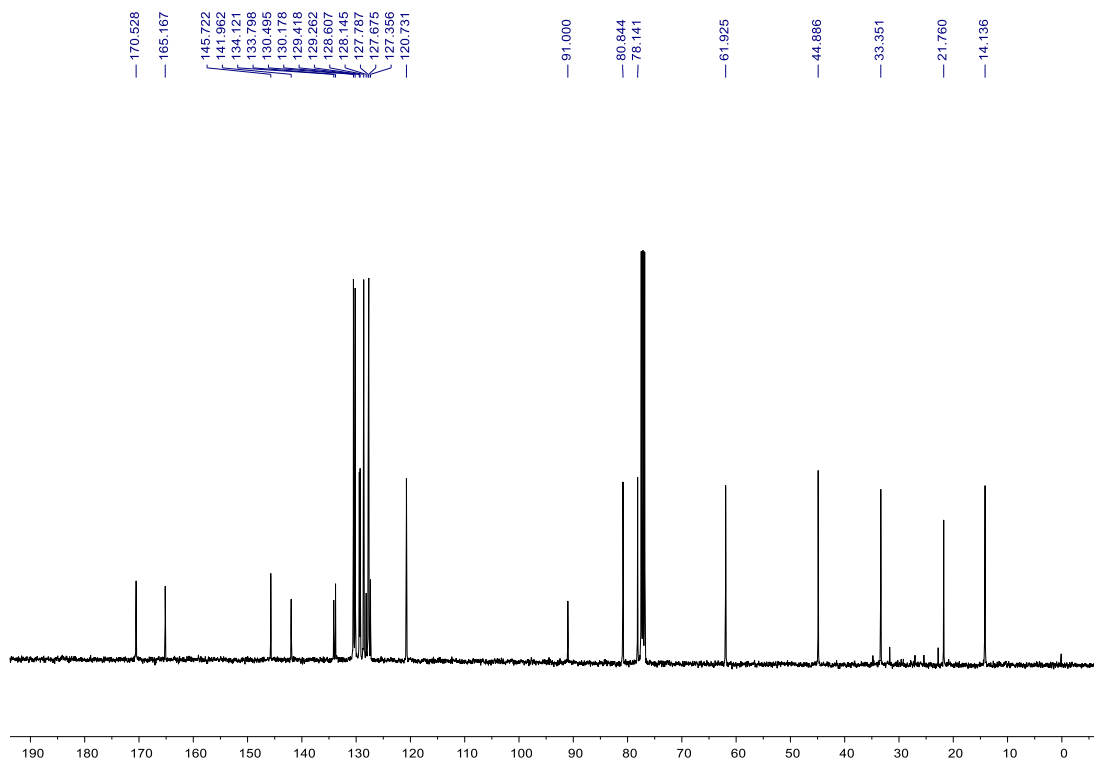

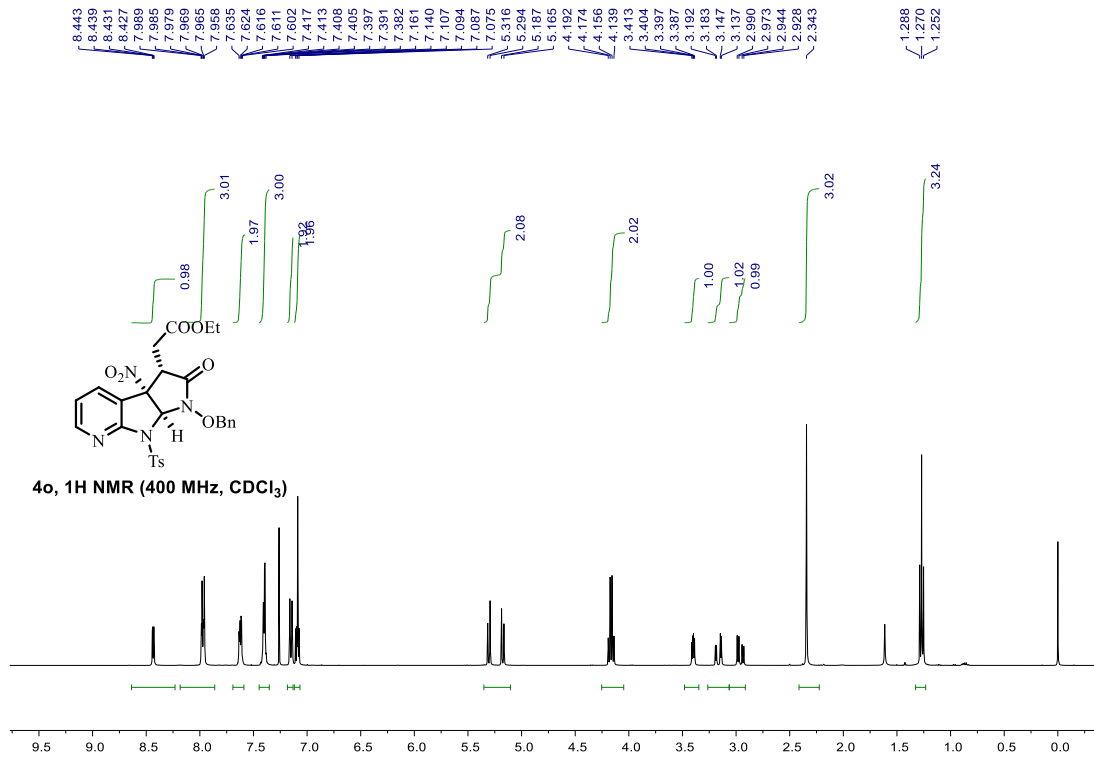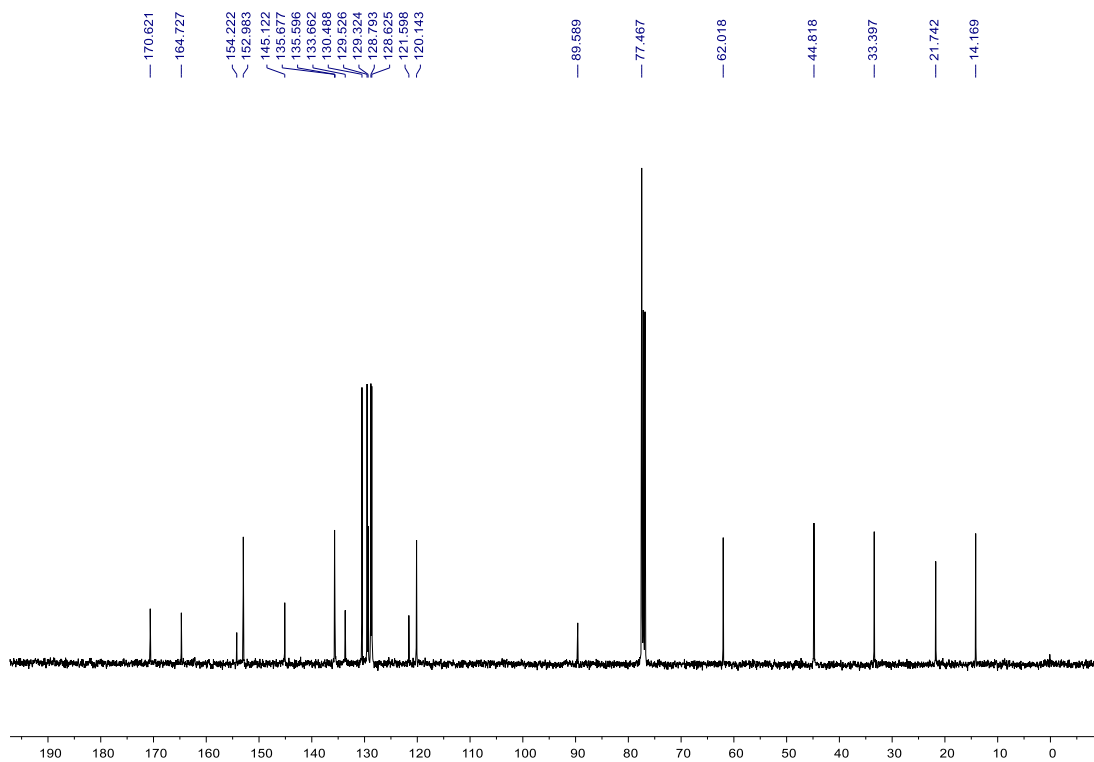

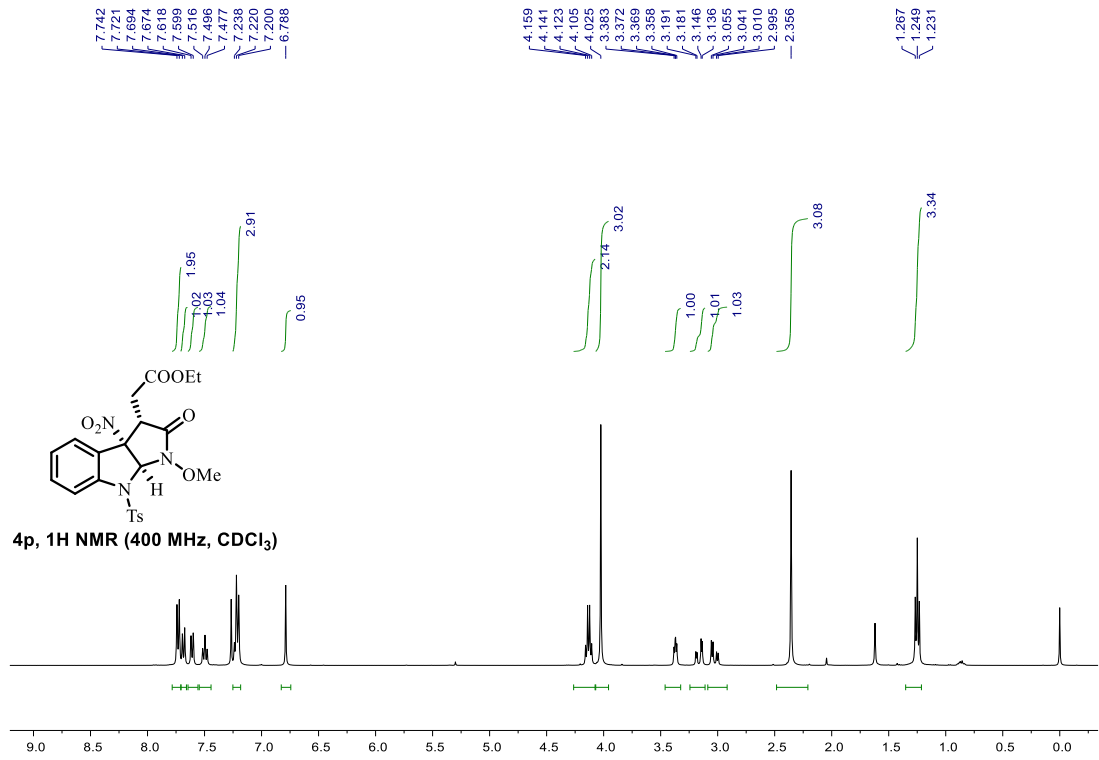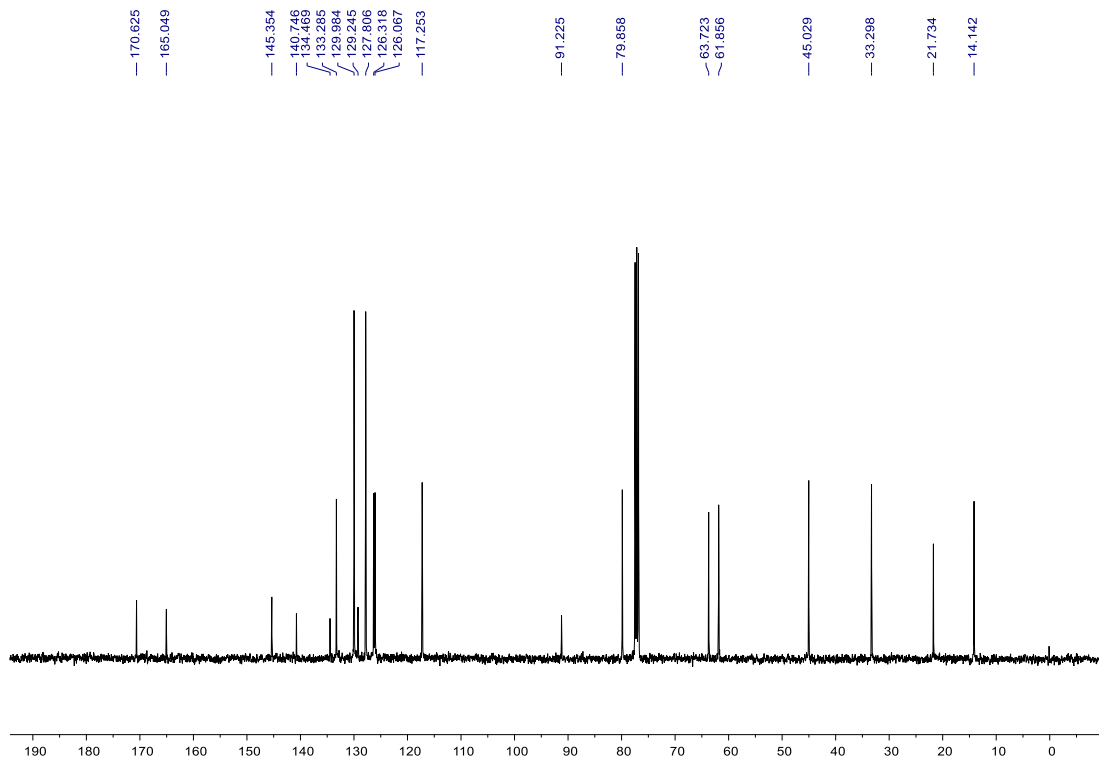

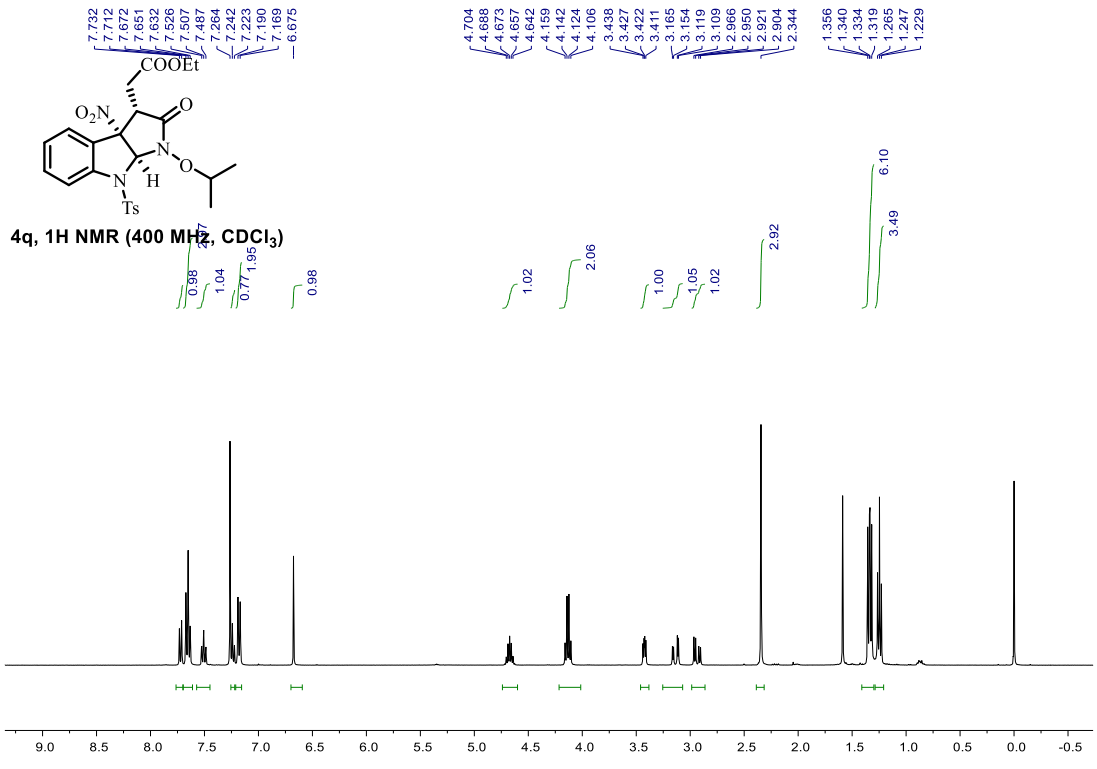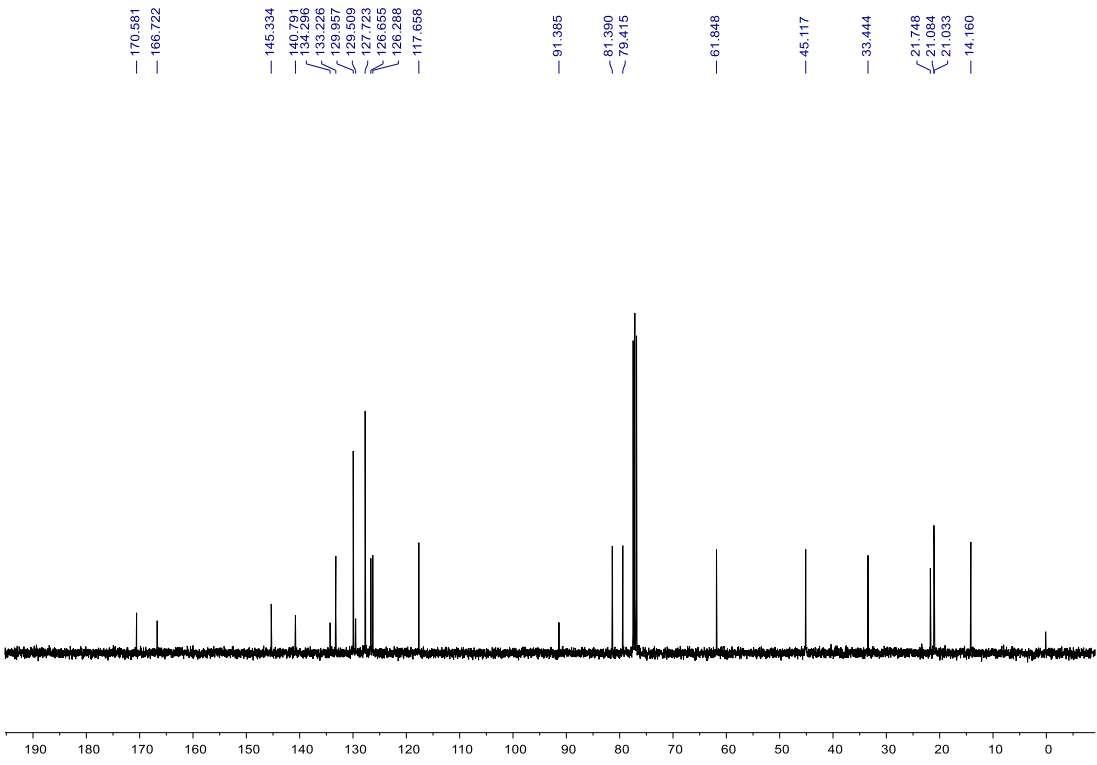

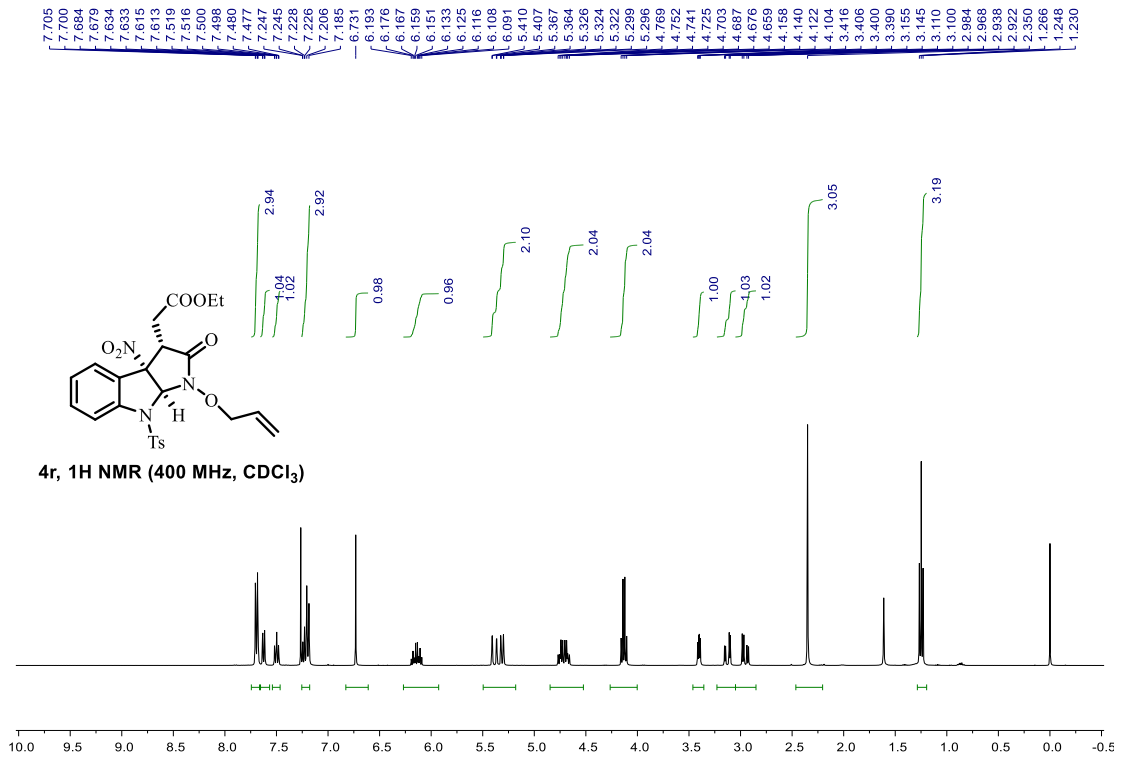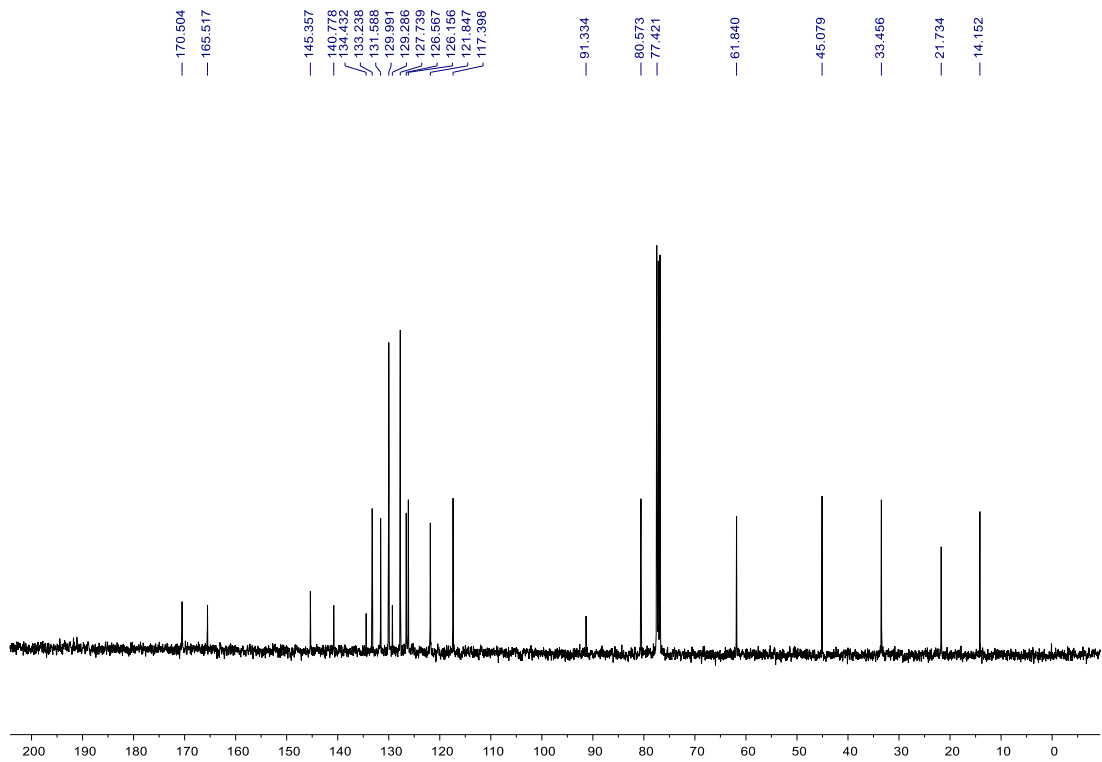

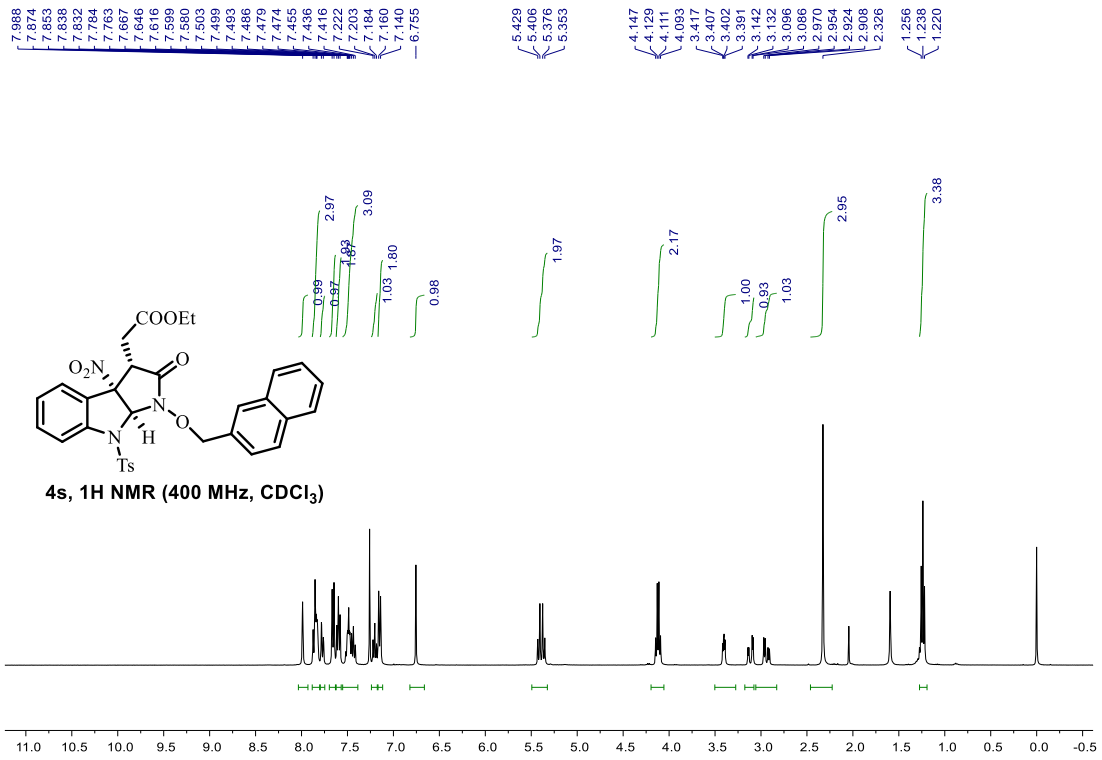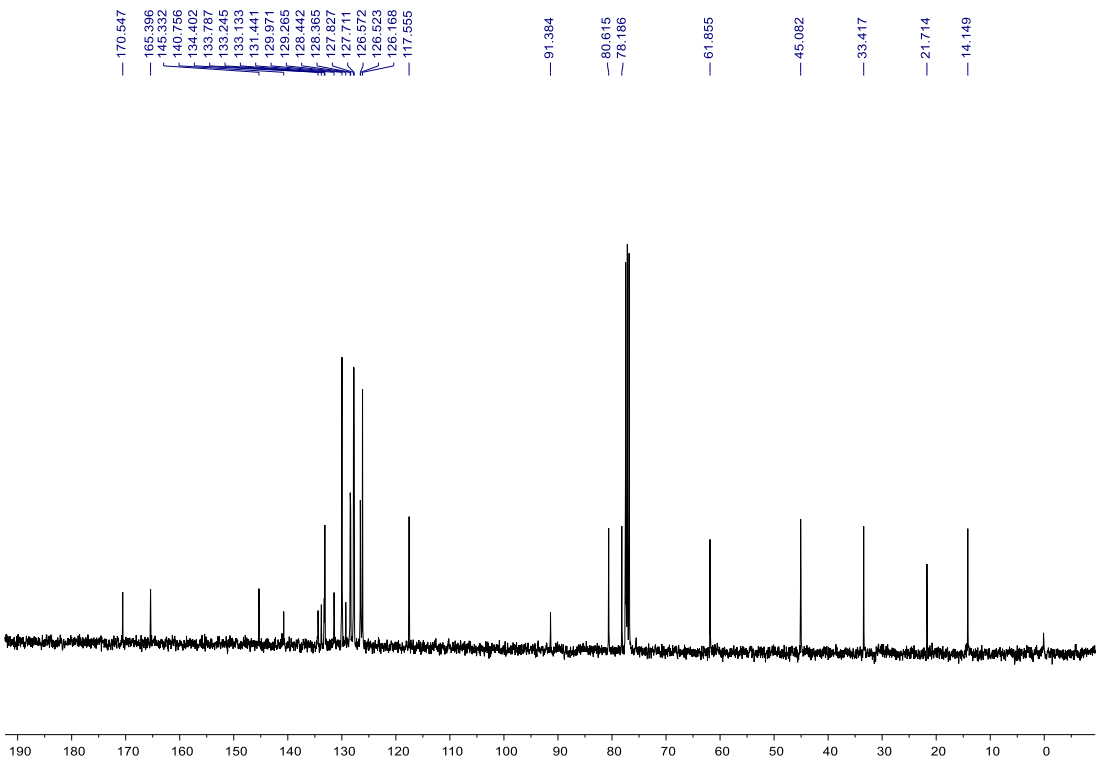



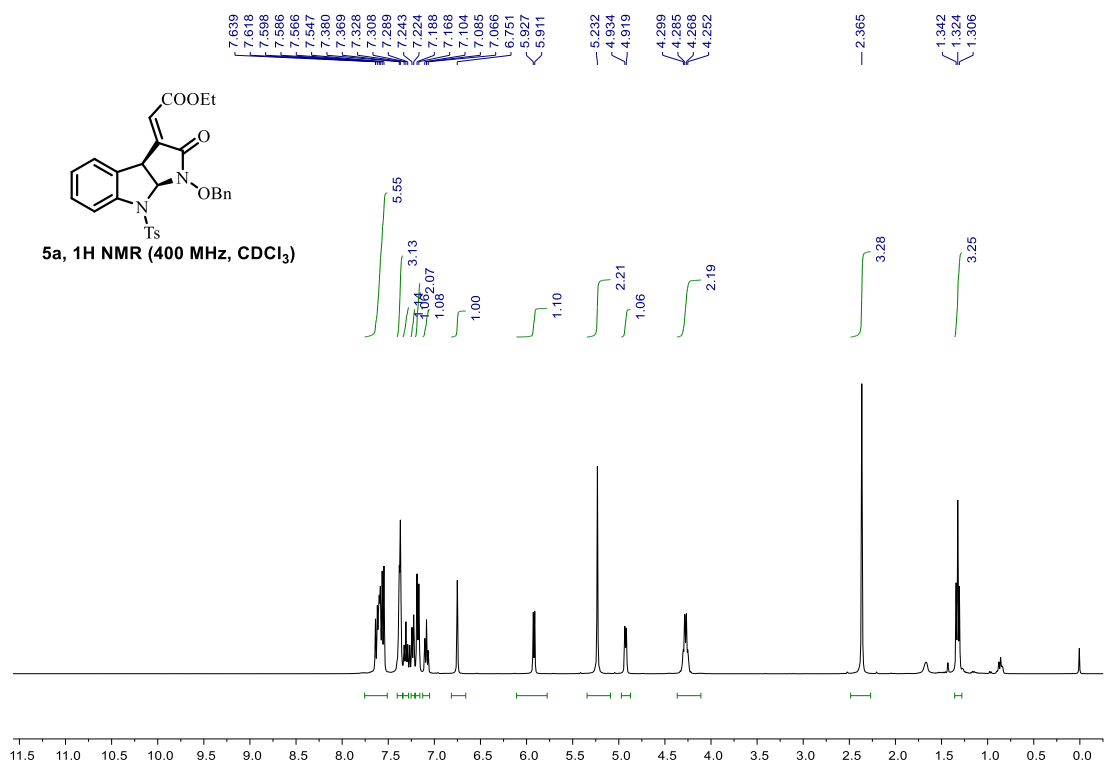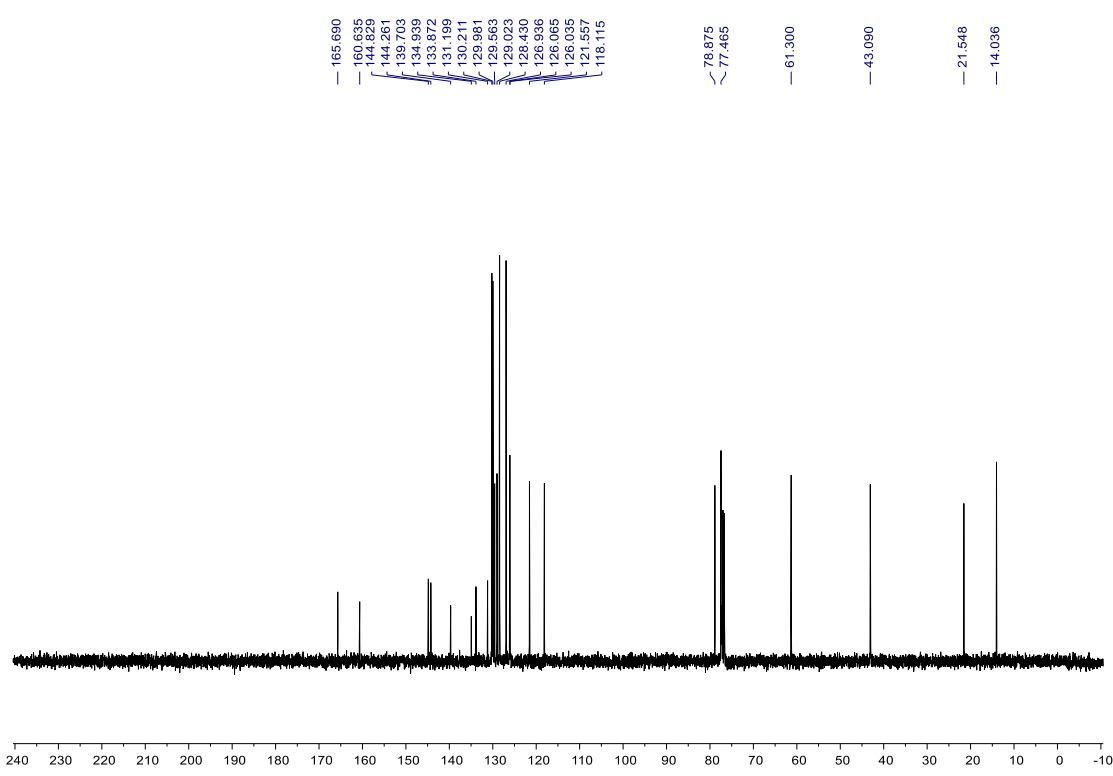

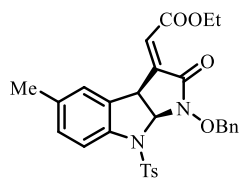

**5b, 1H NMR (400 MHz, CDCl<sub>3</sub>)**

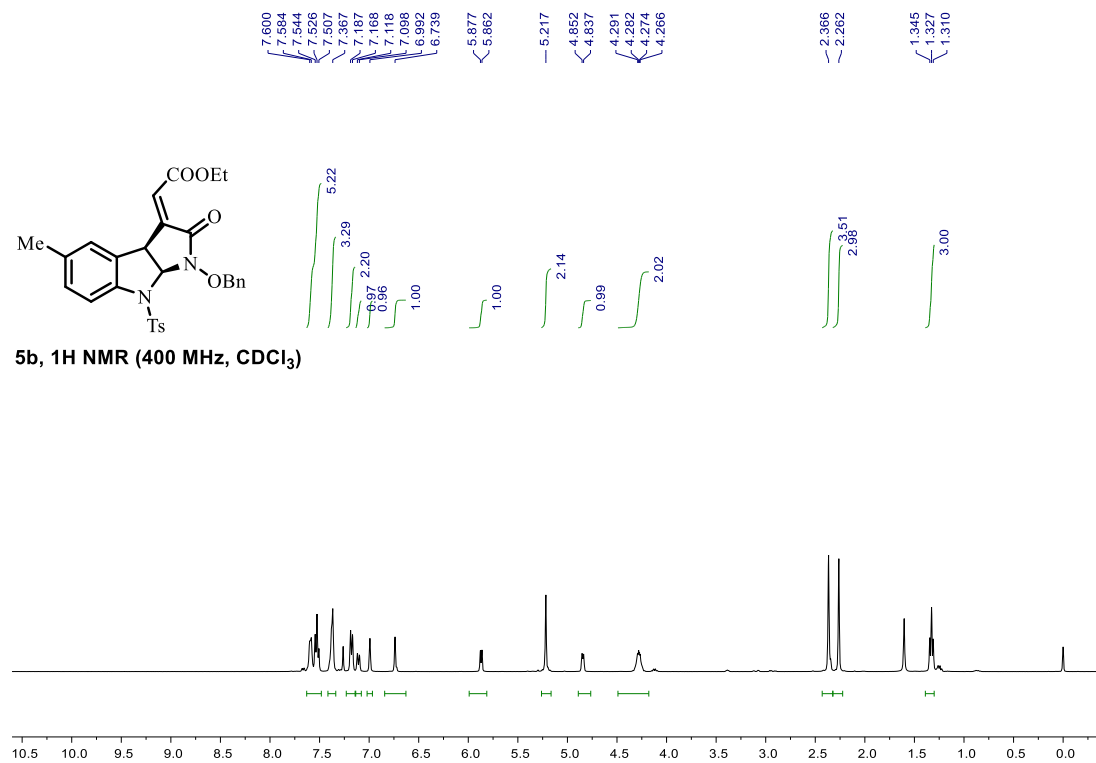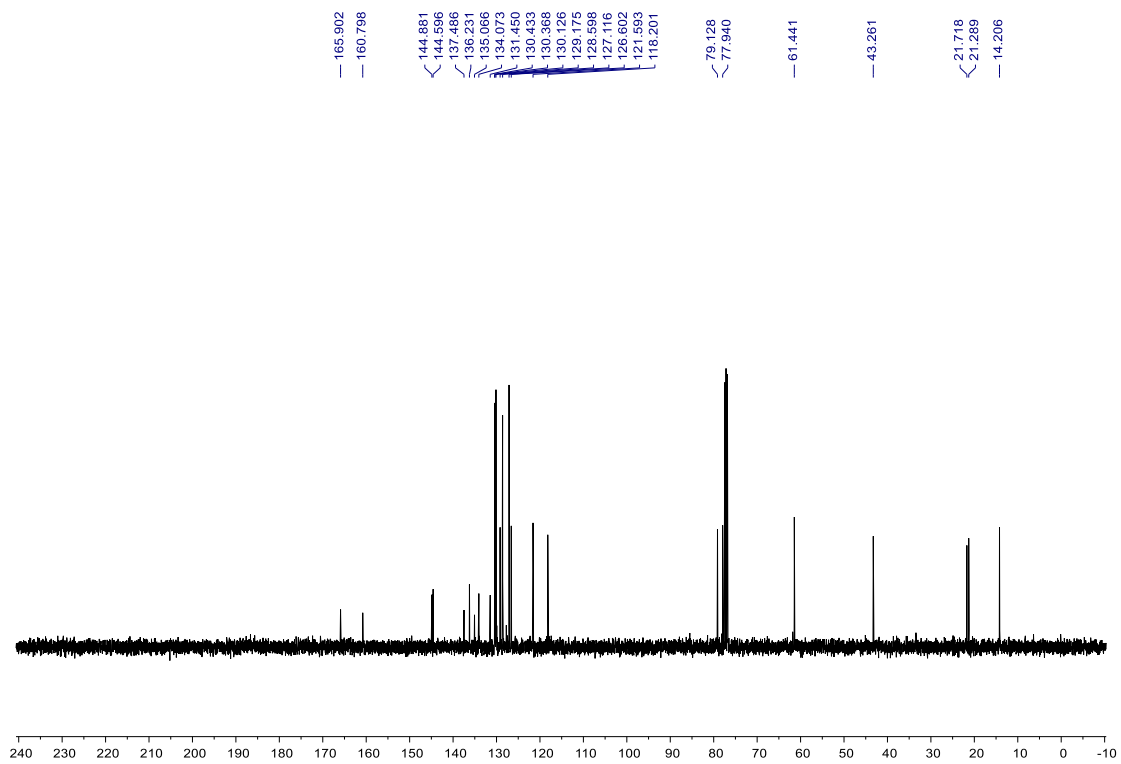

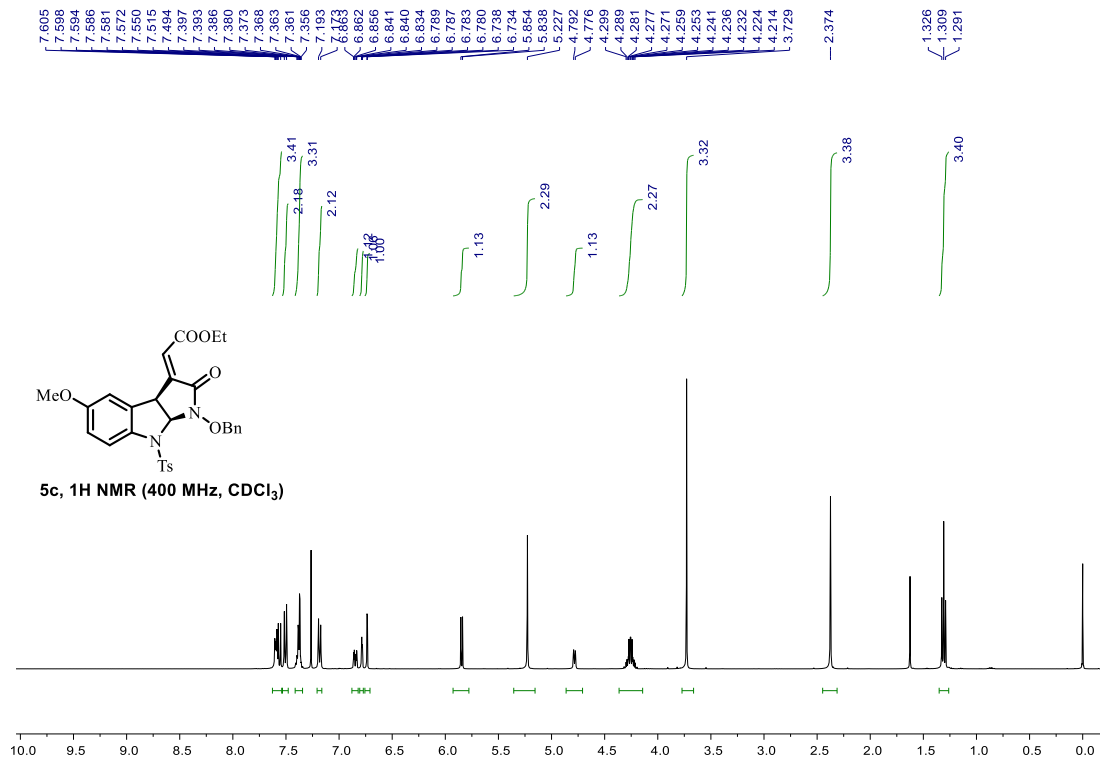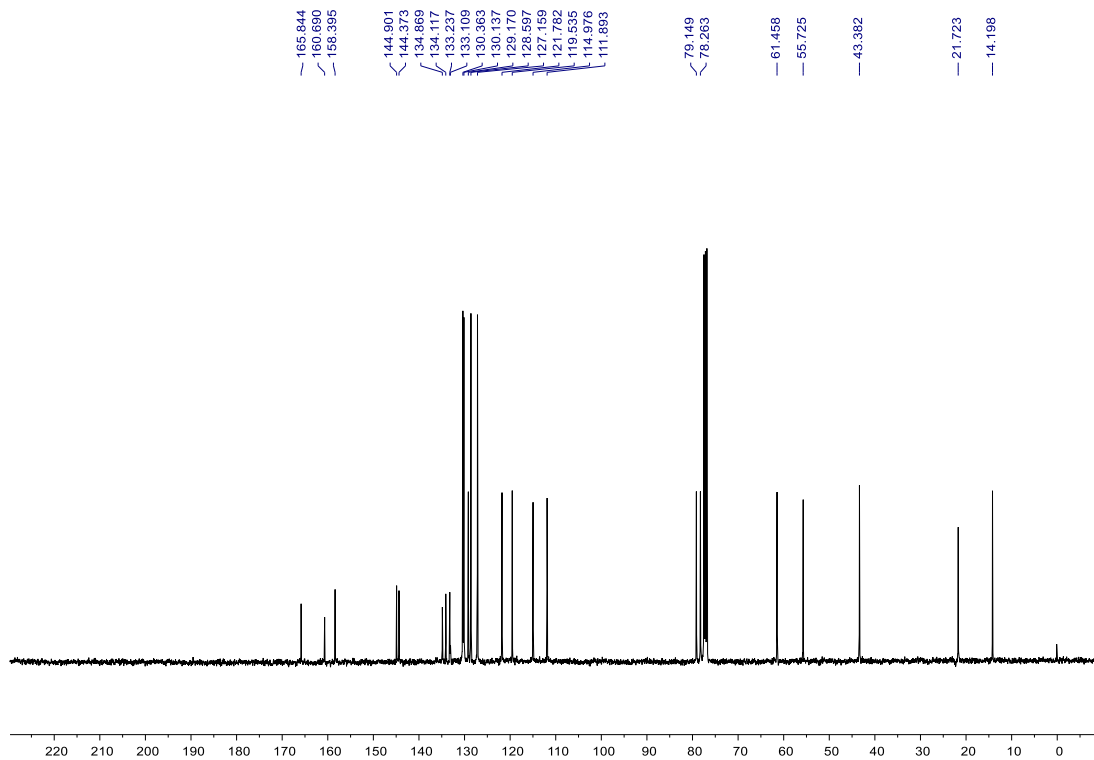

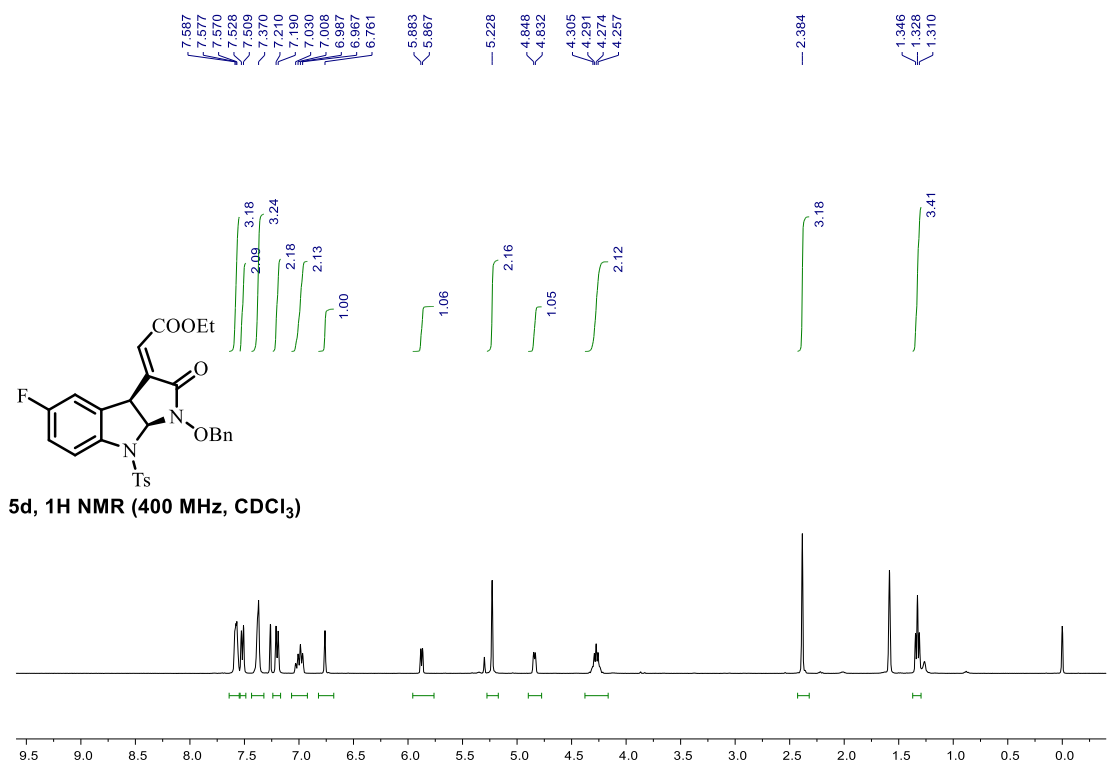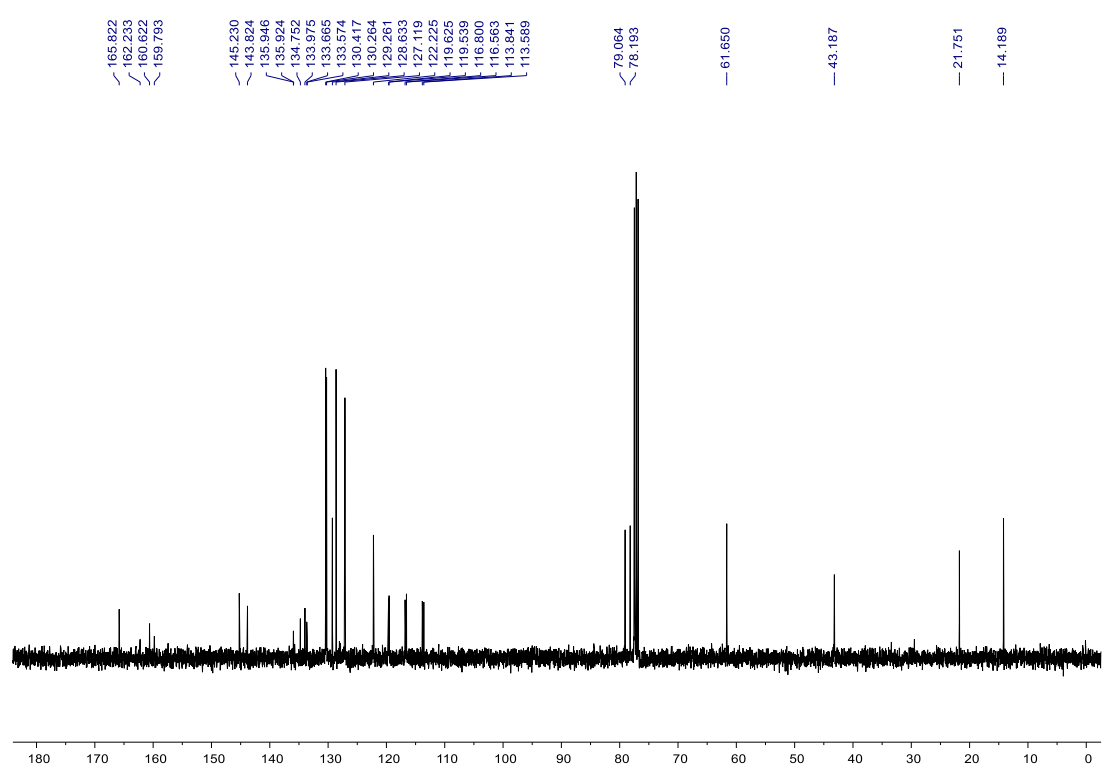

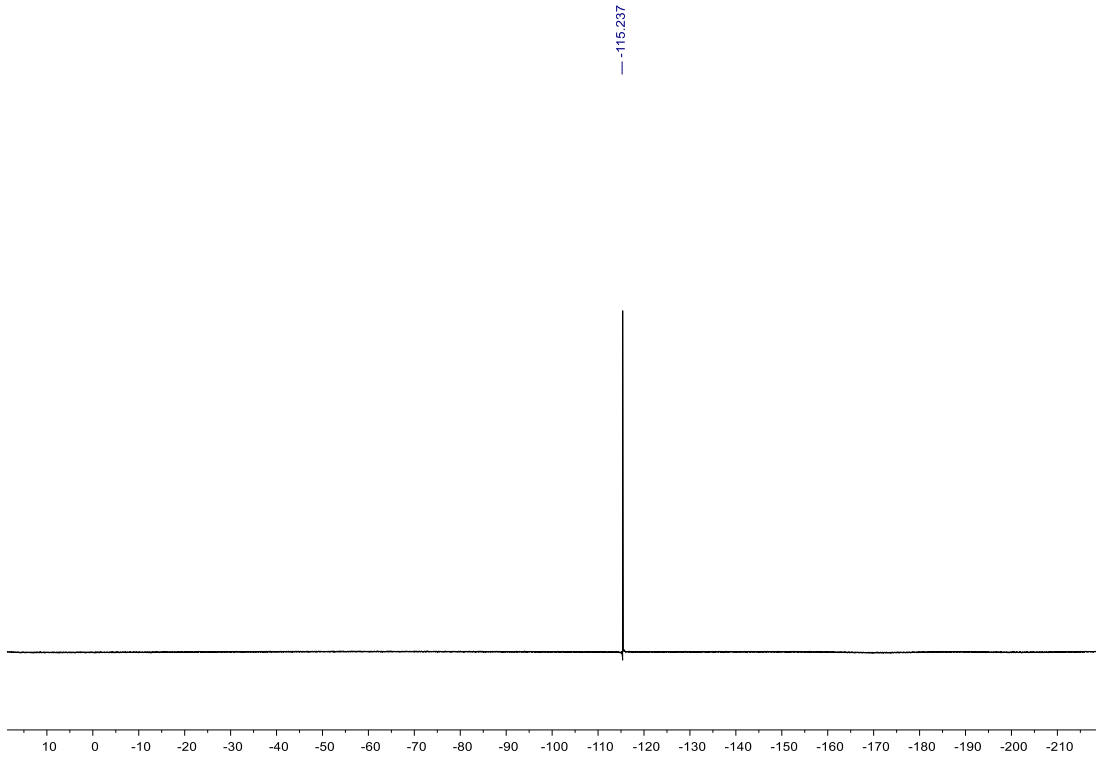

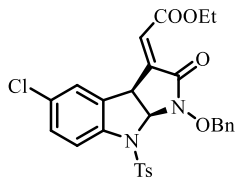

5e, <sup>1</sup>H NMR (400 MHz, CDCl<sub>3</sub>)

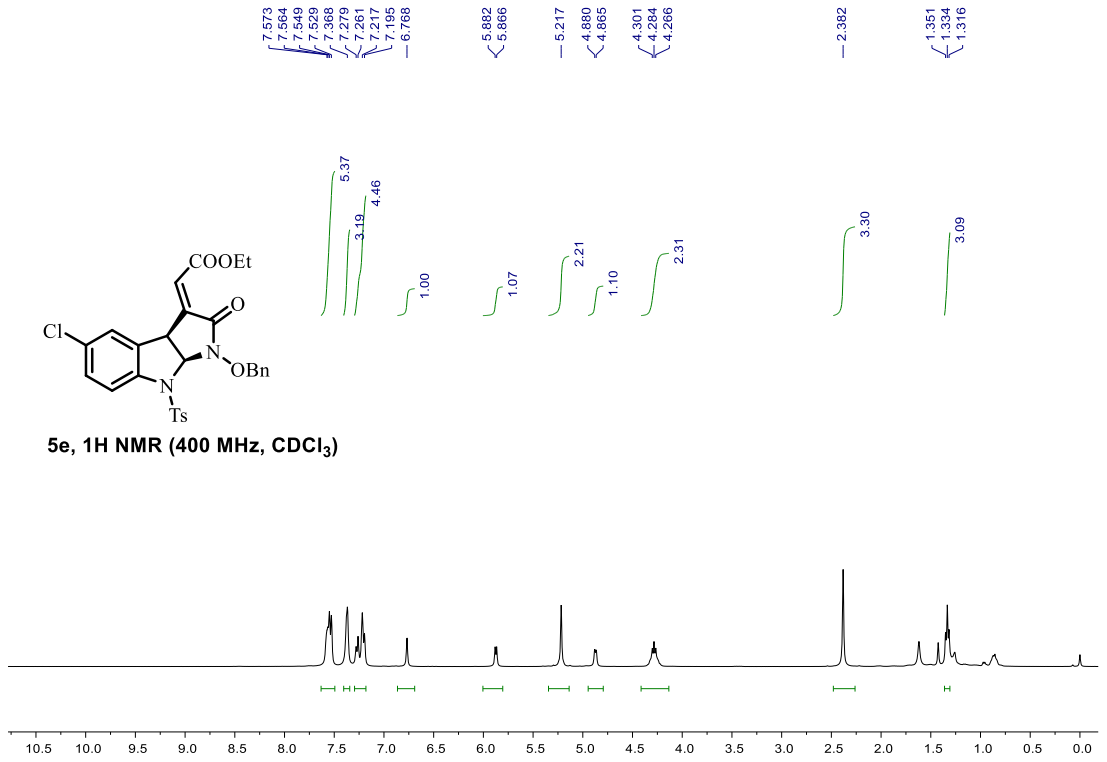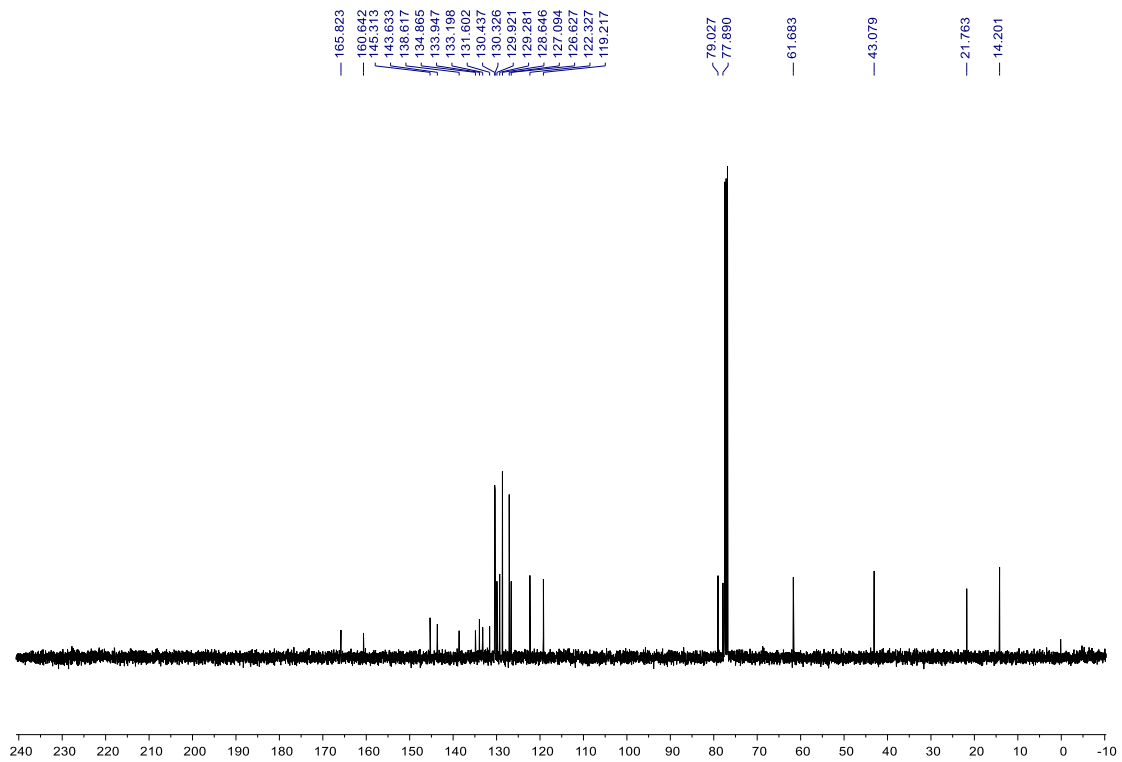

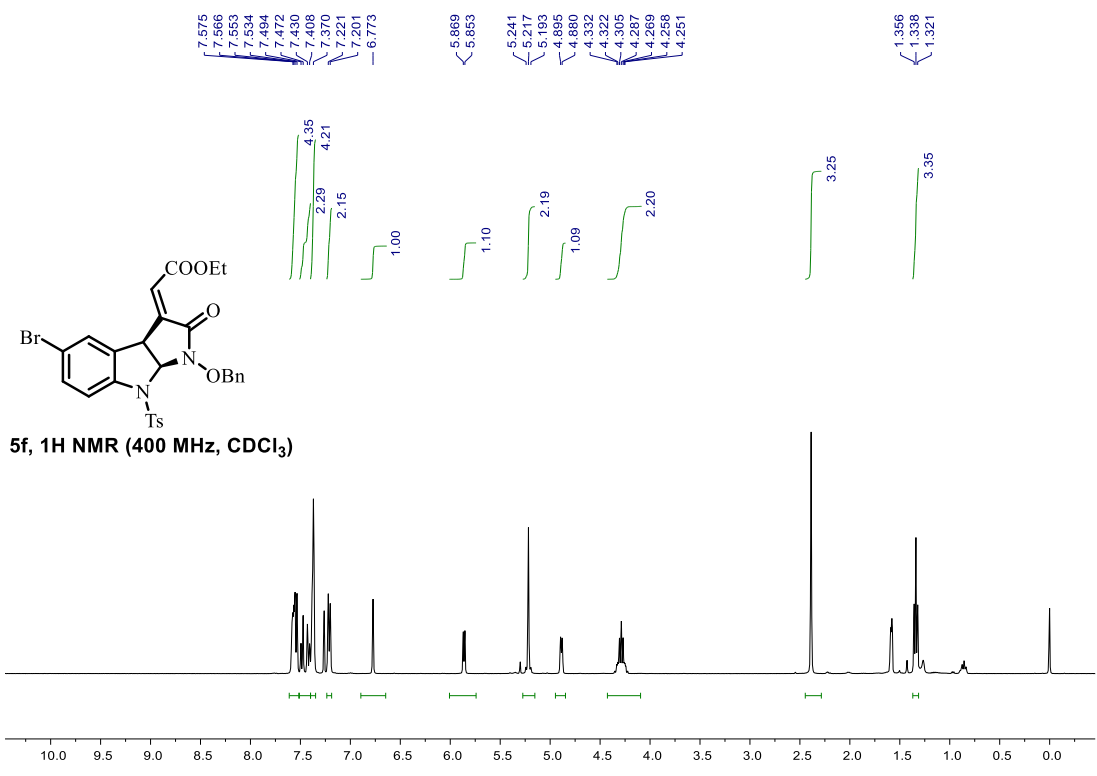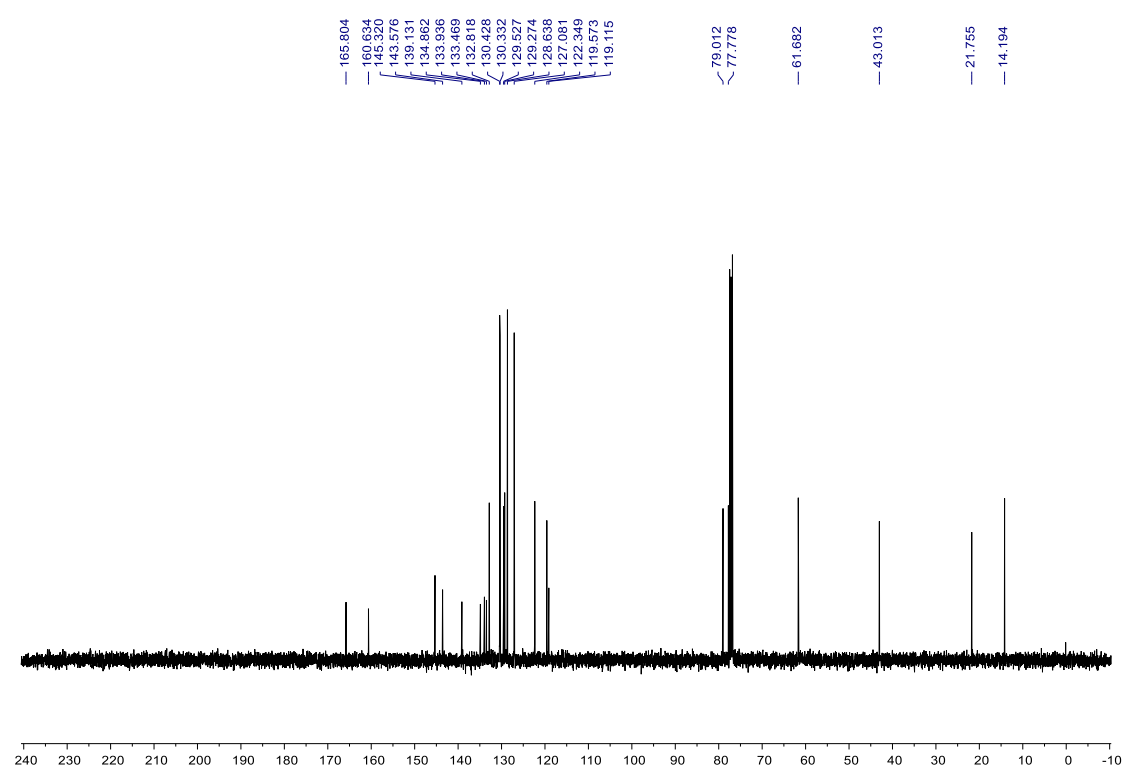

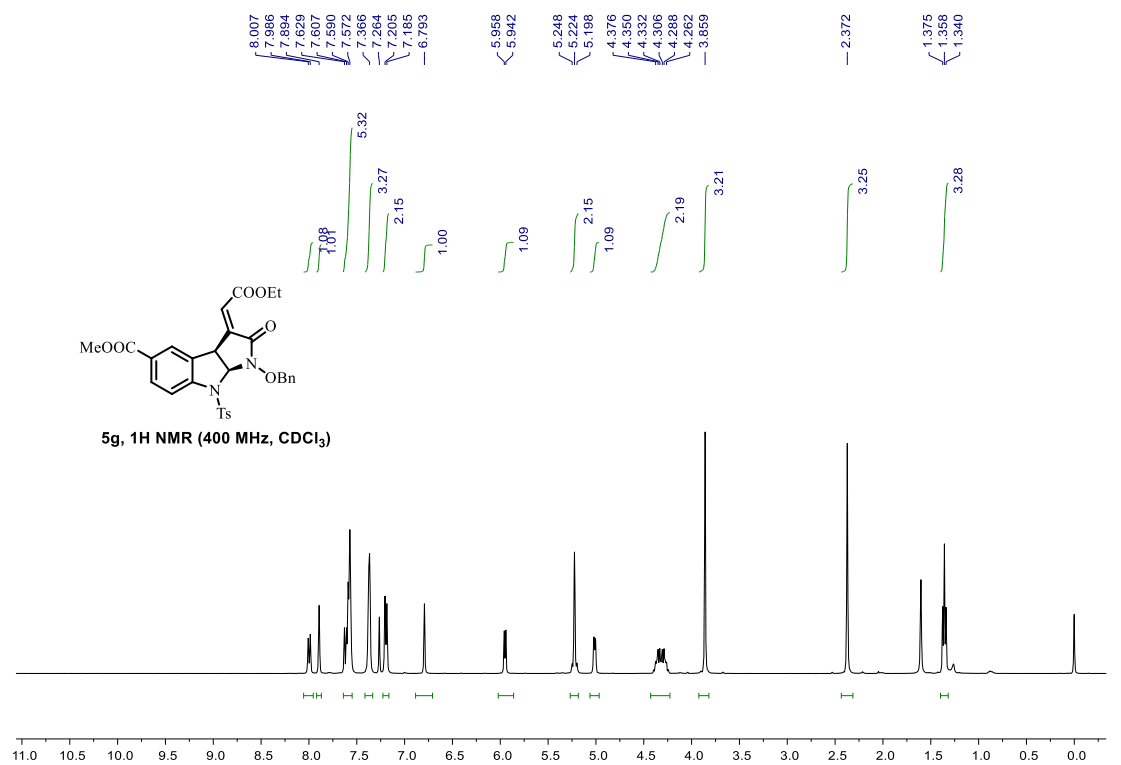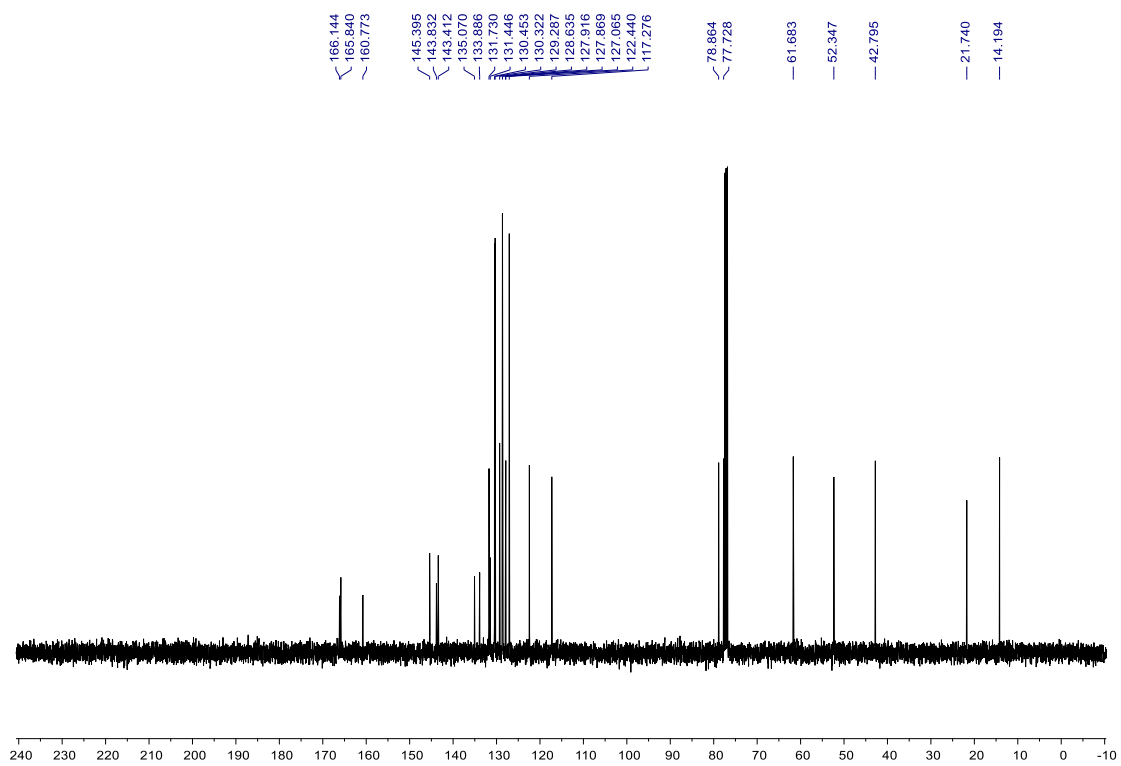



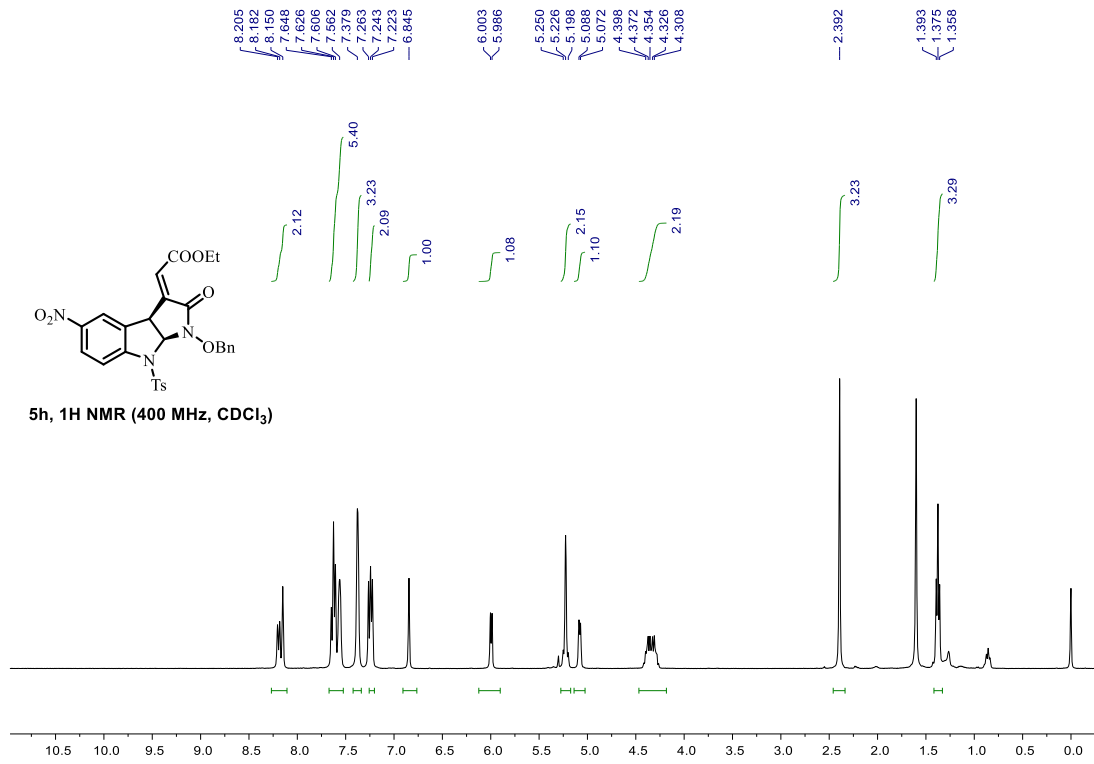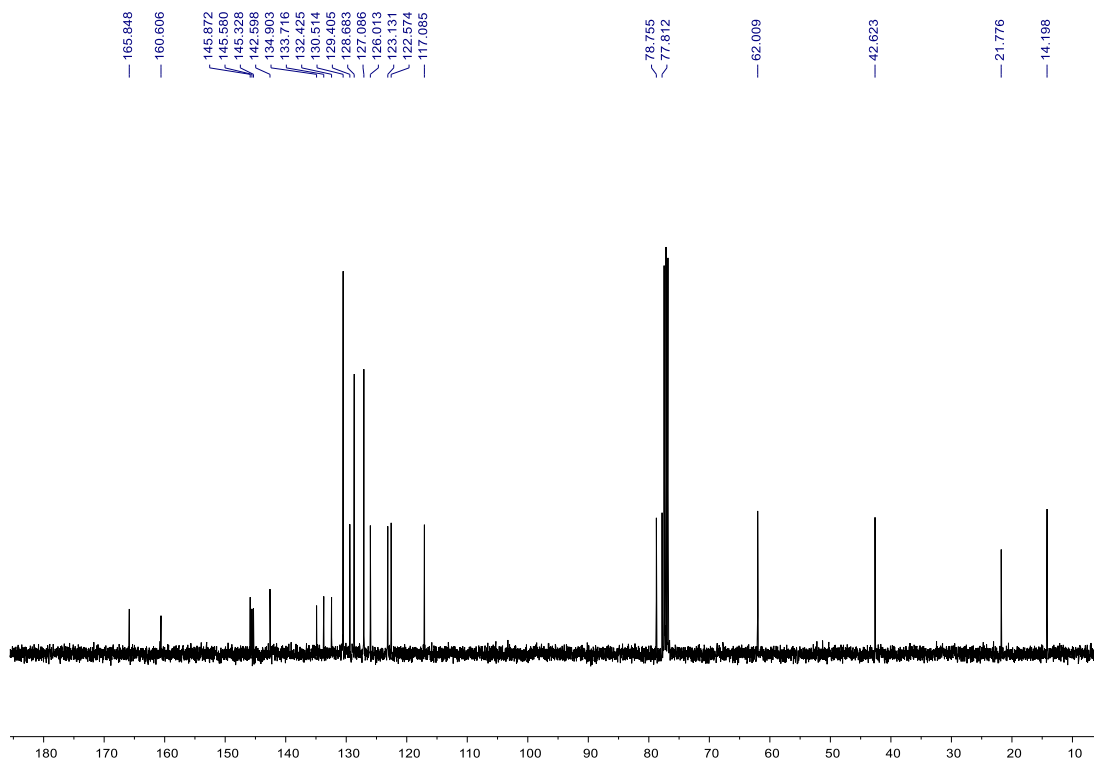

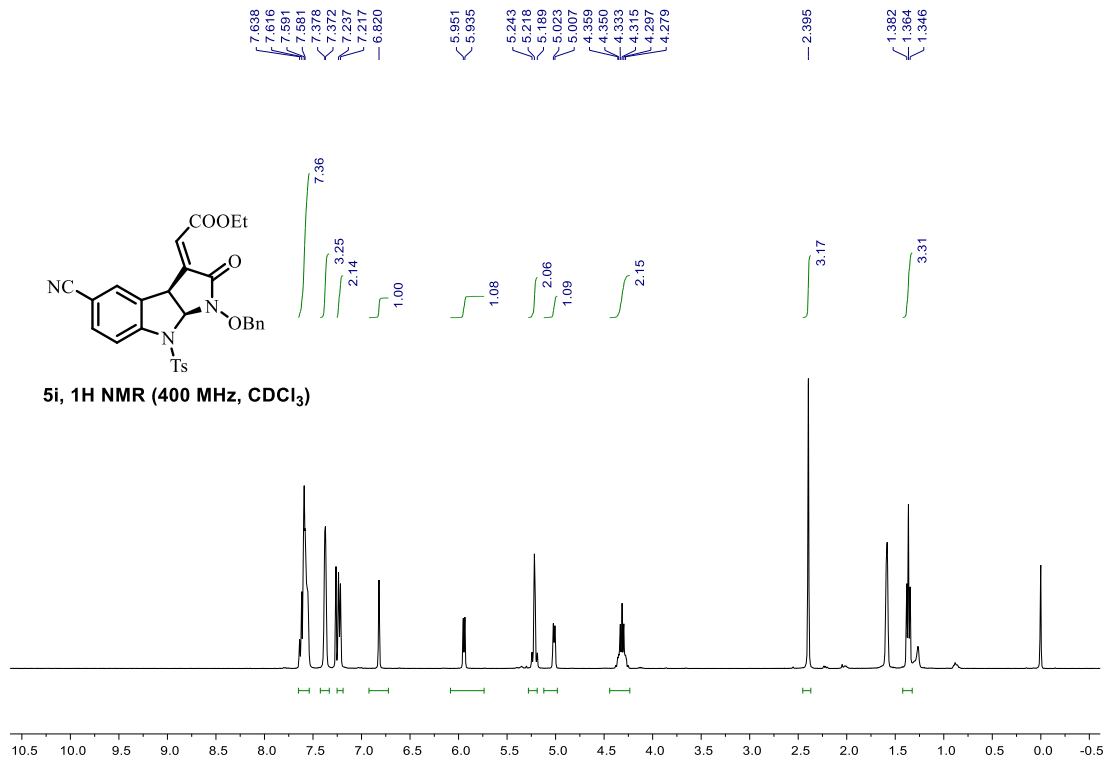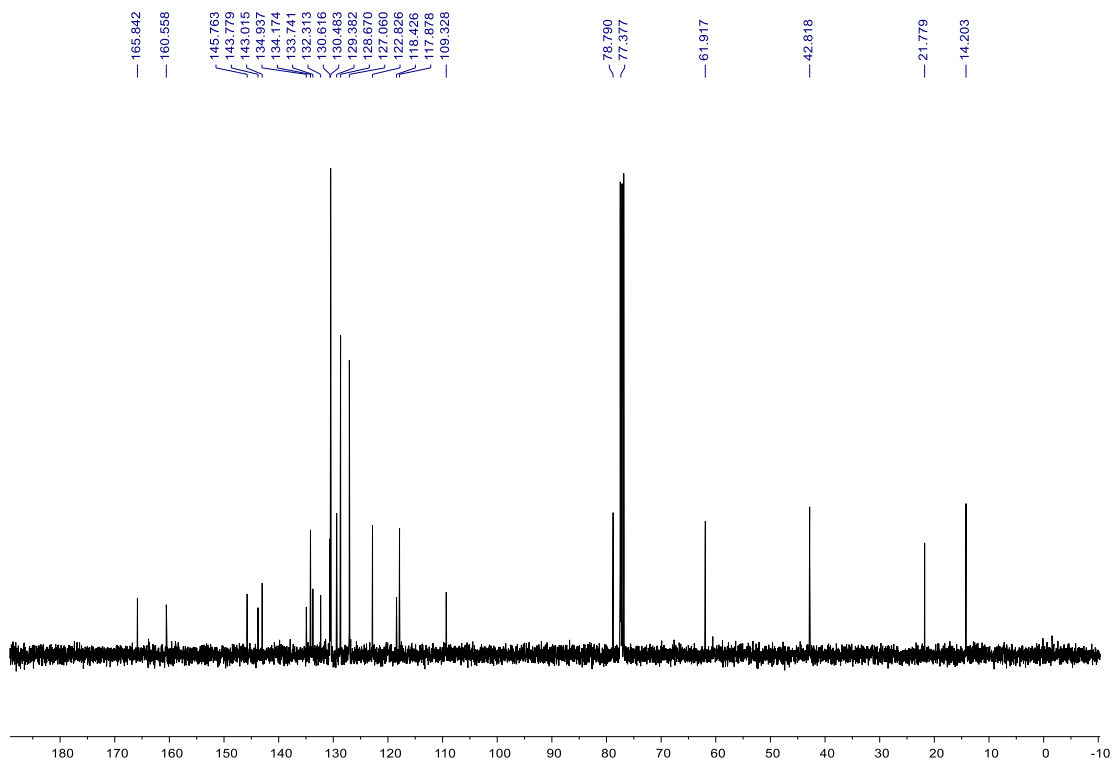

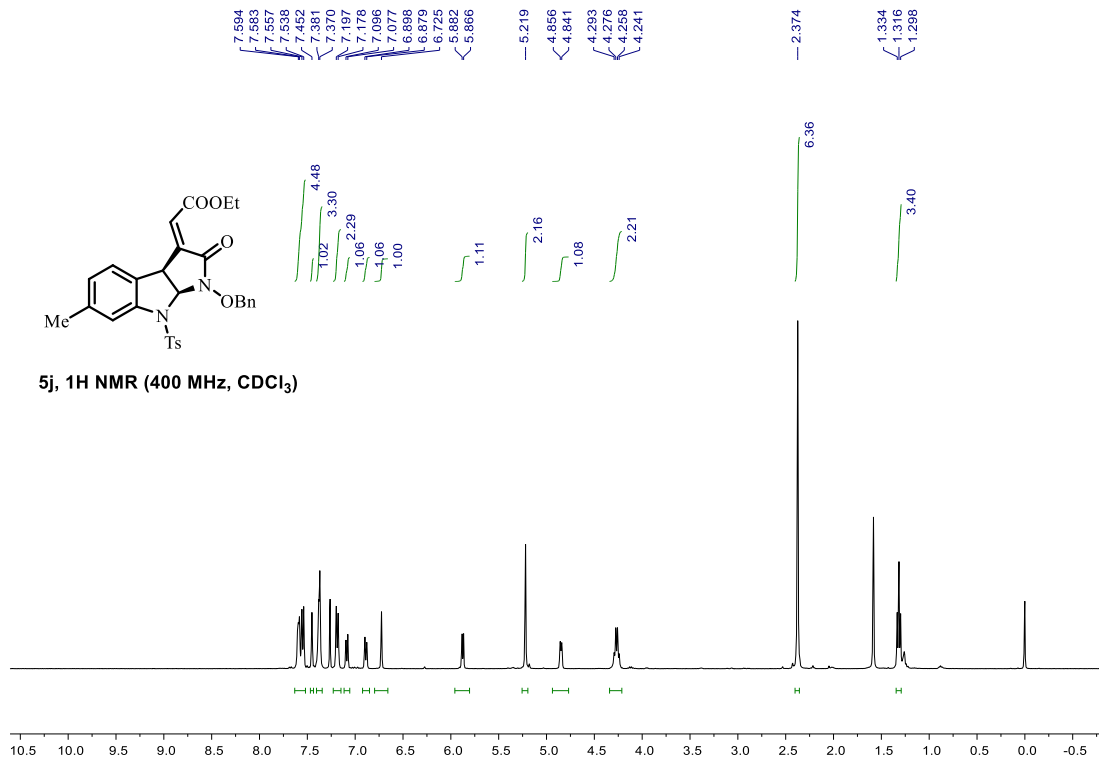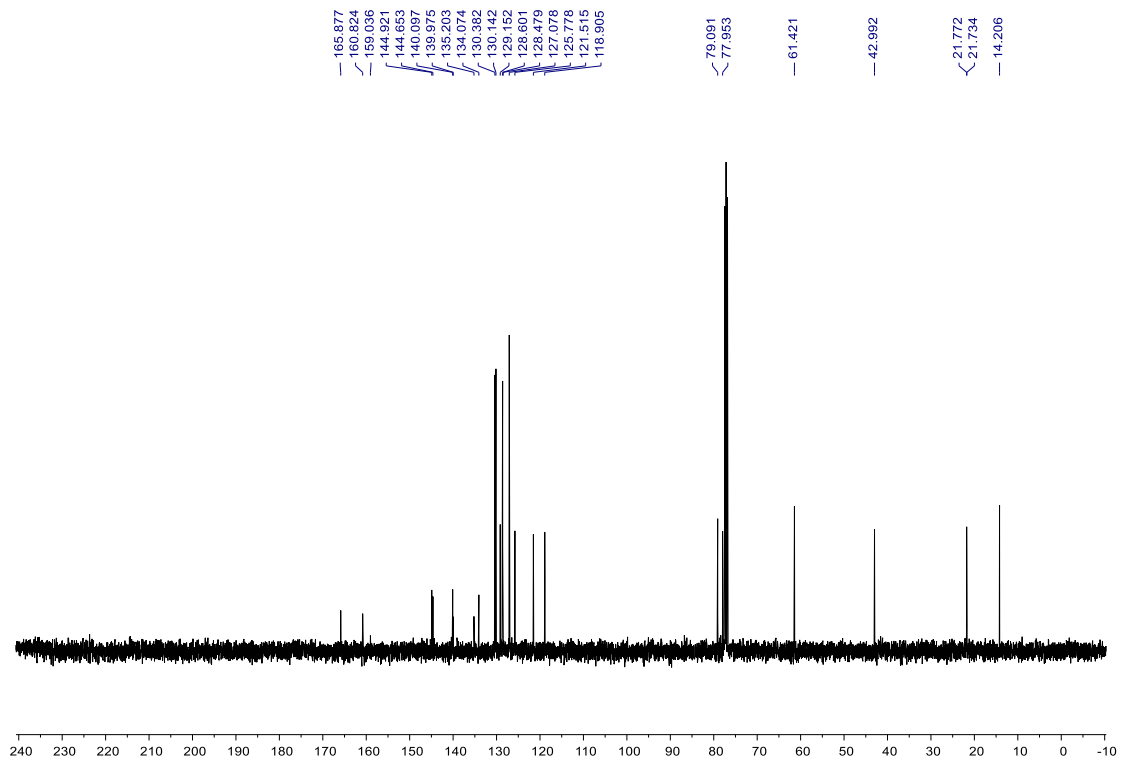

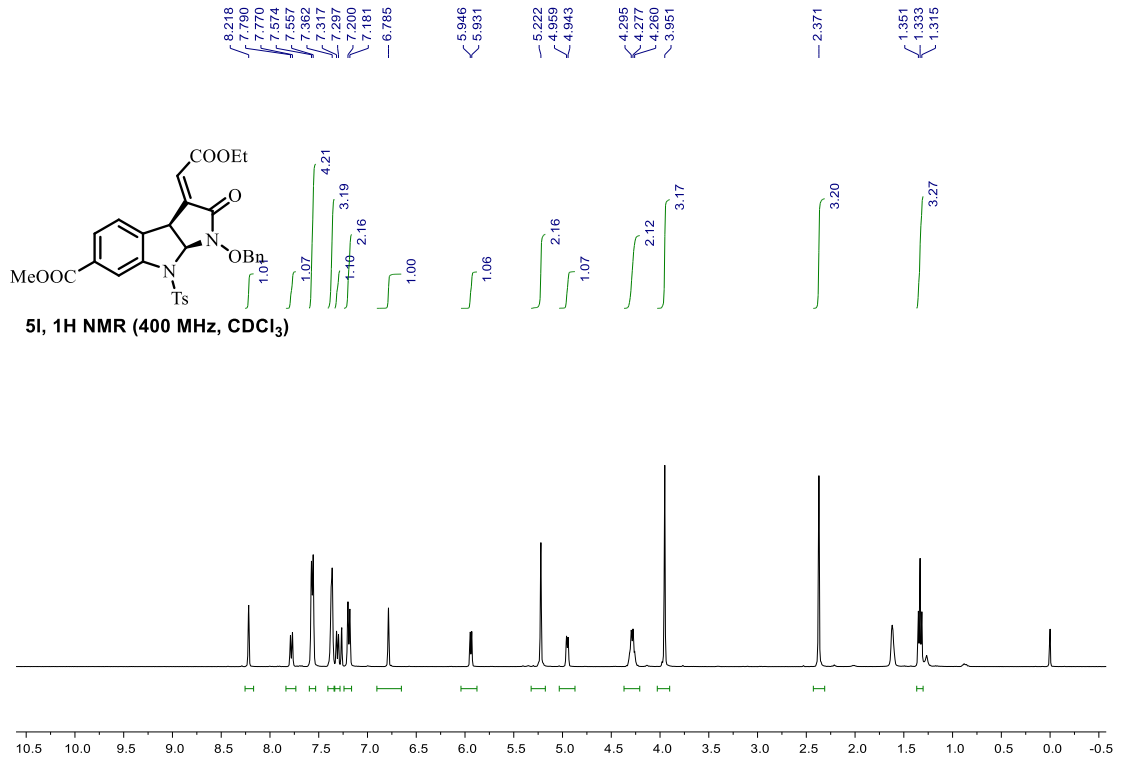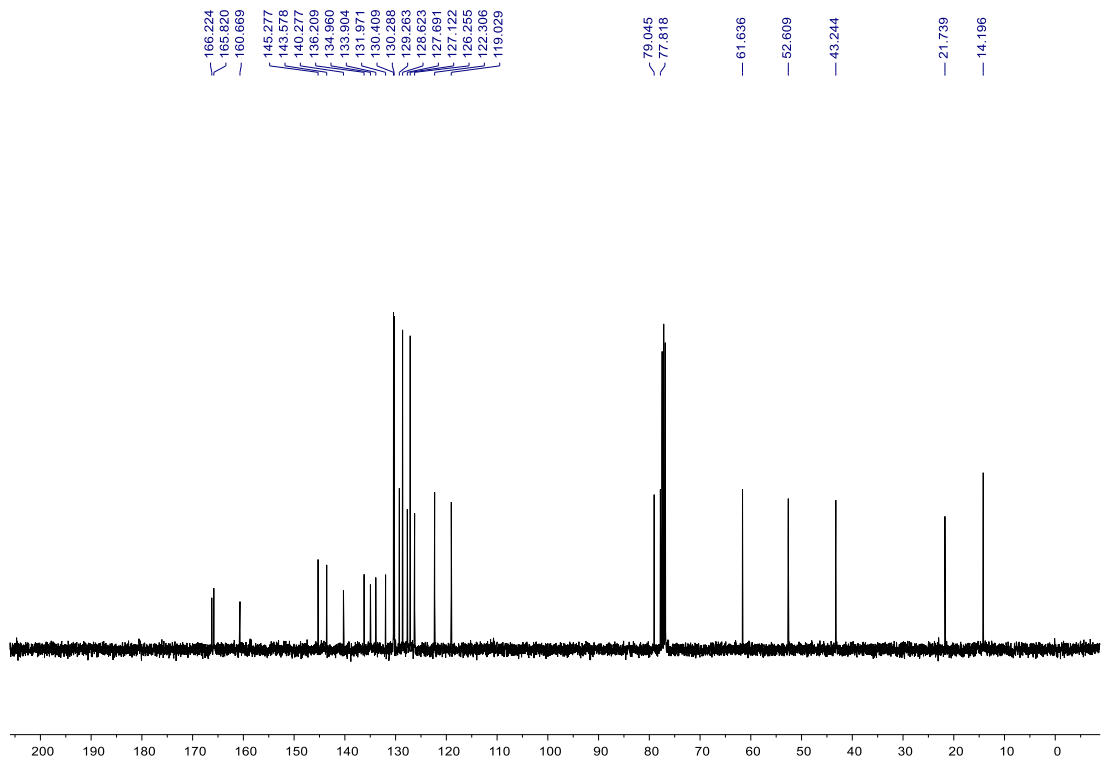

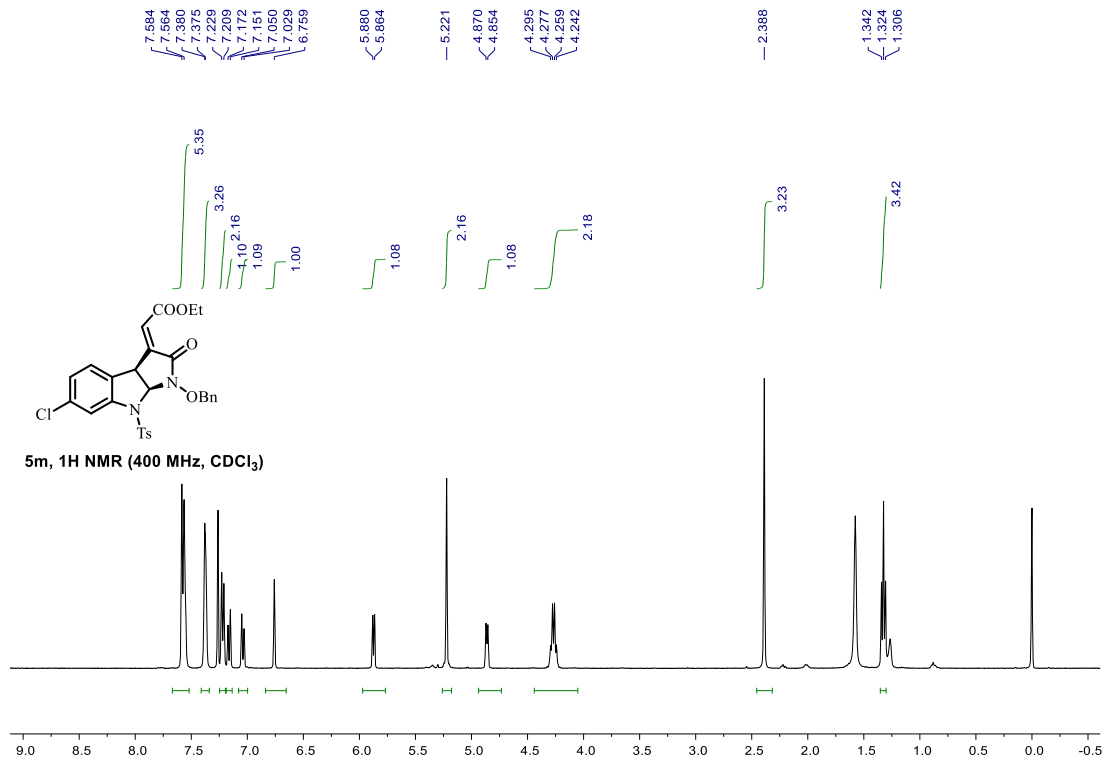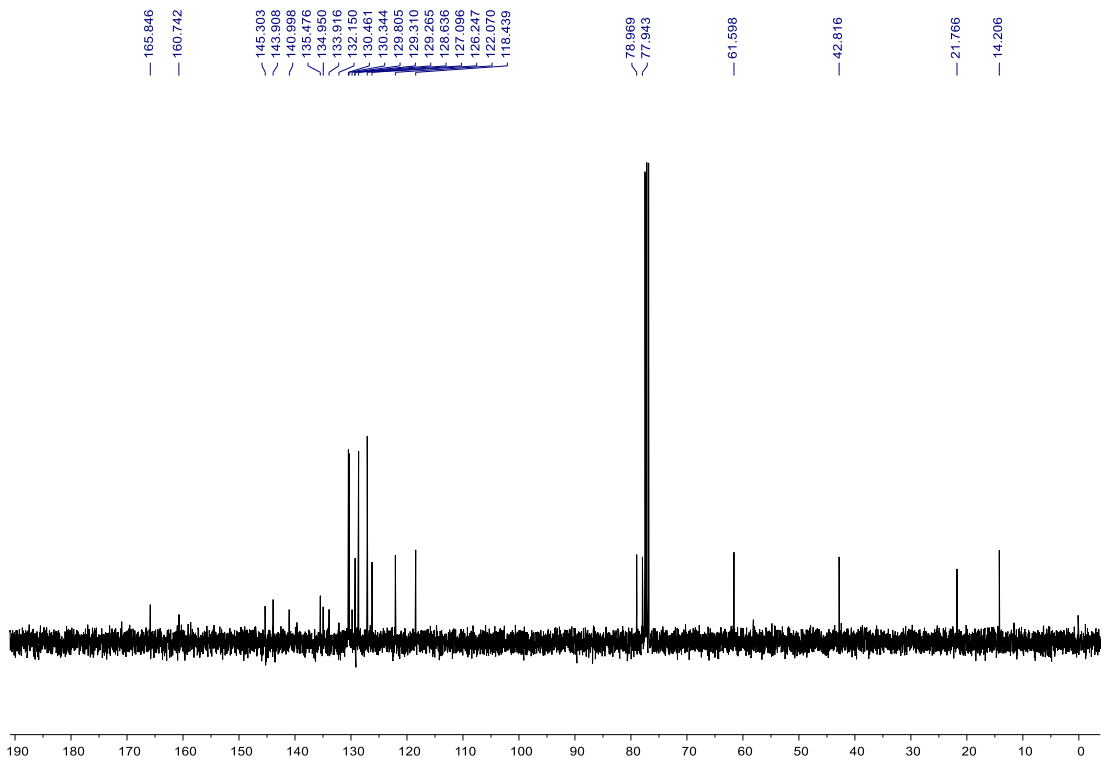

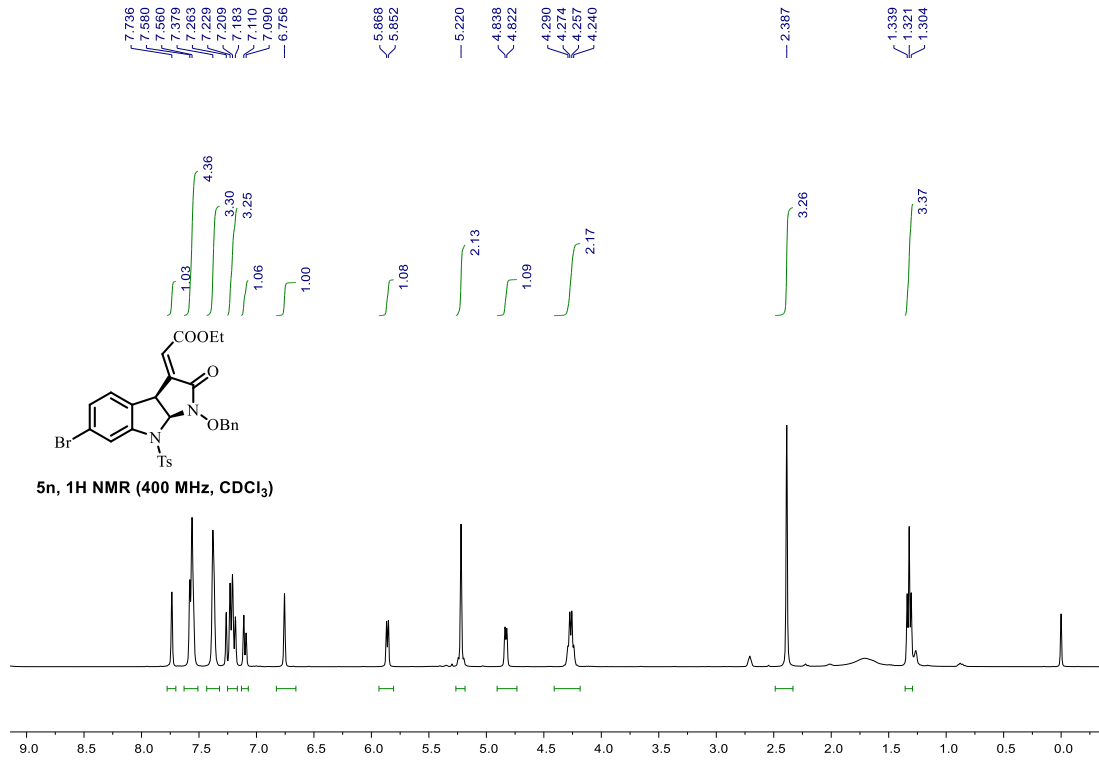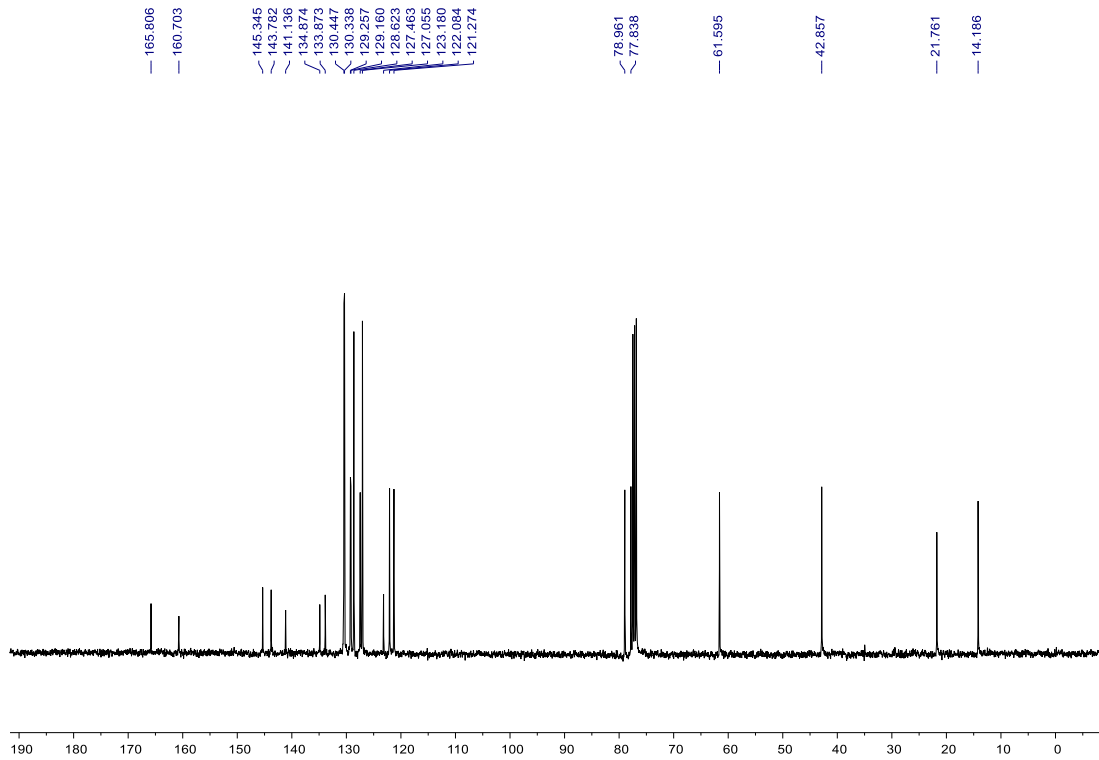

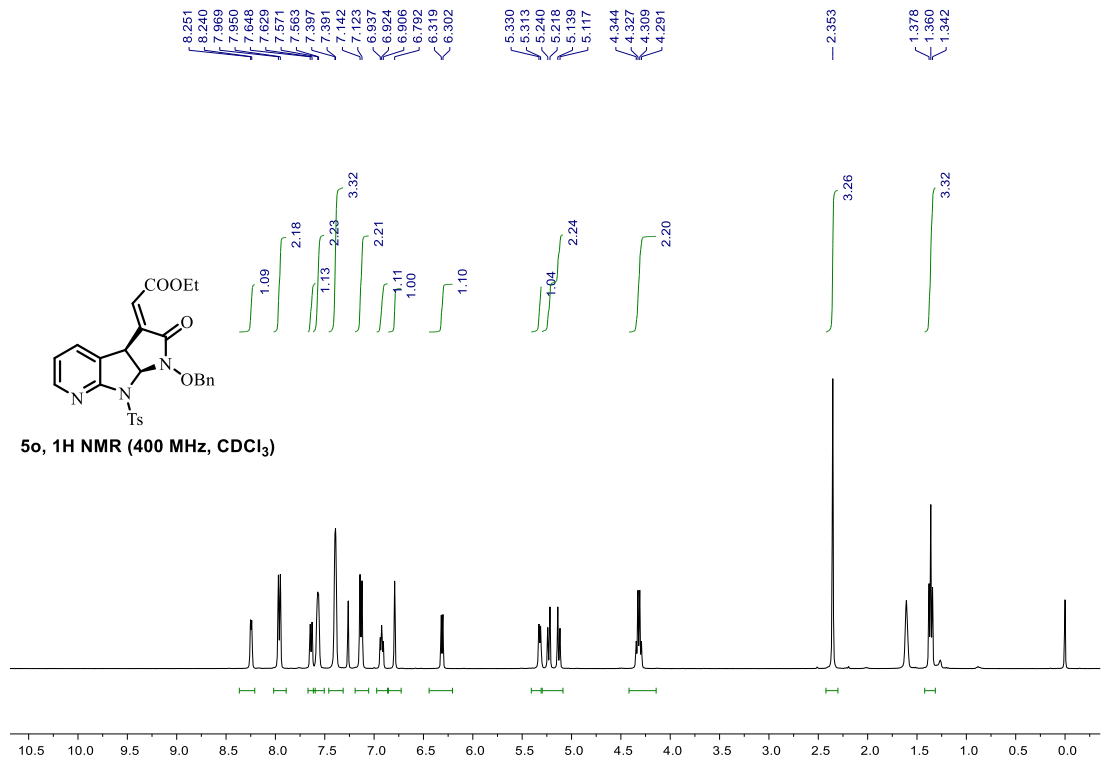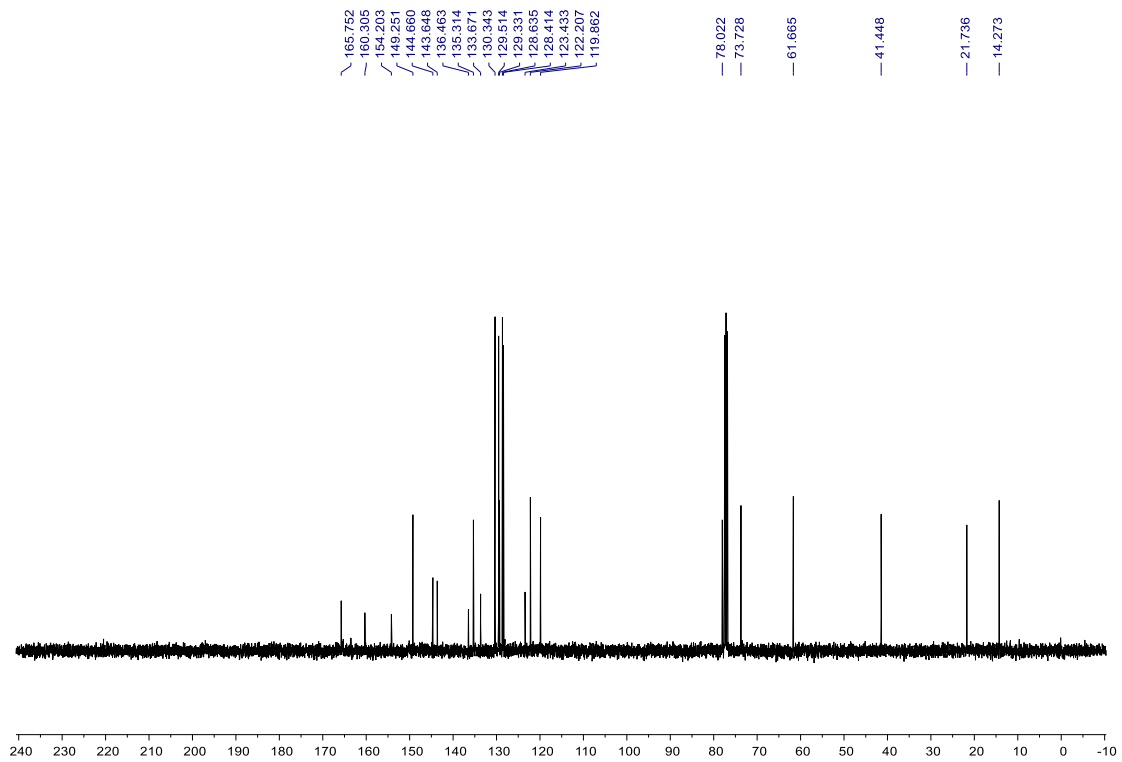

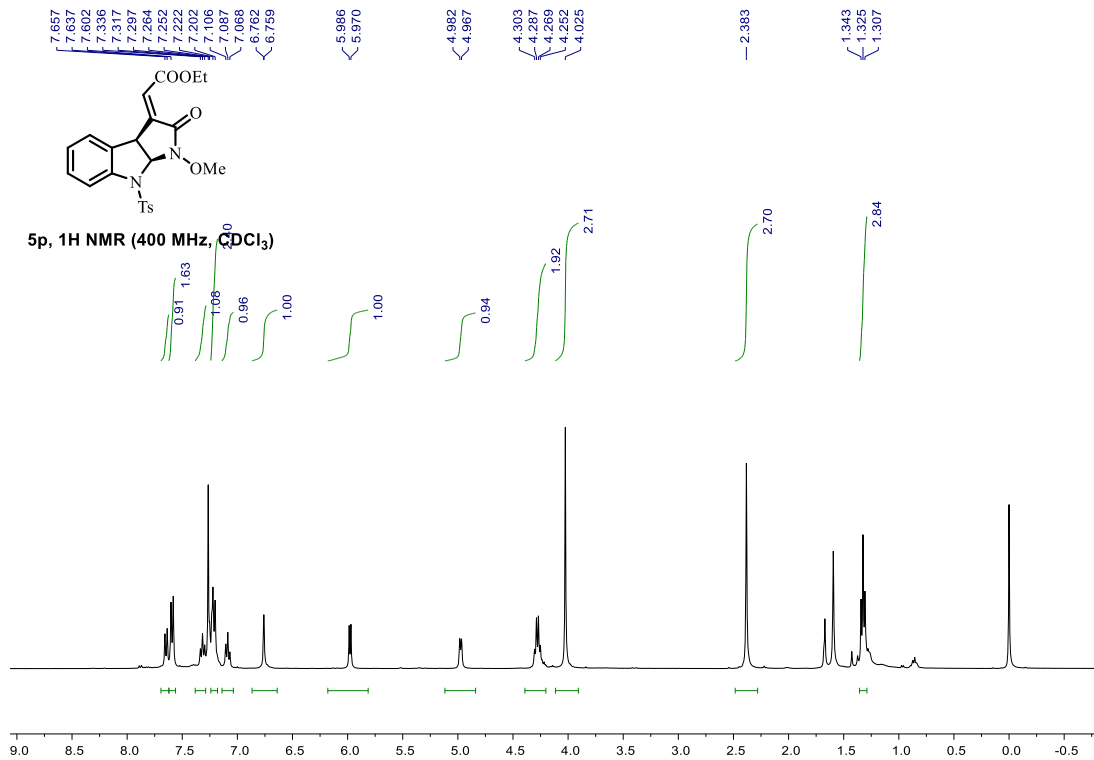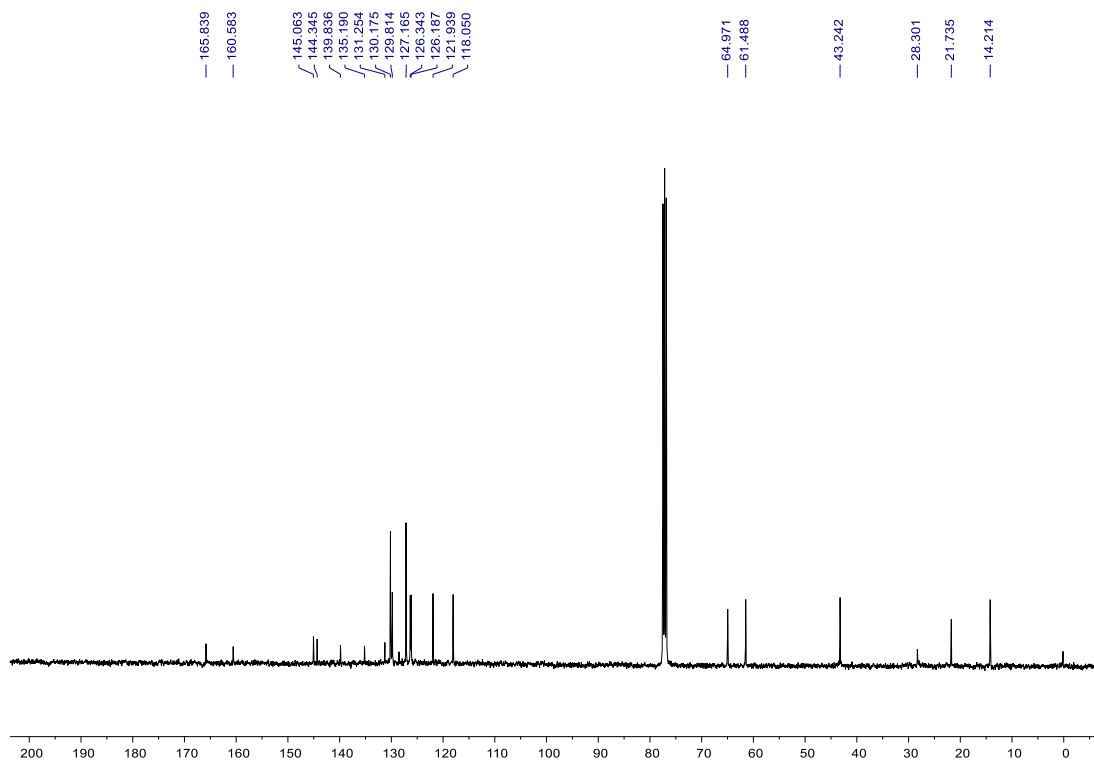



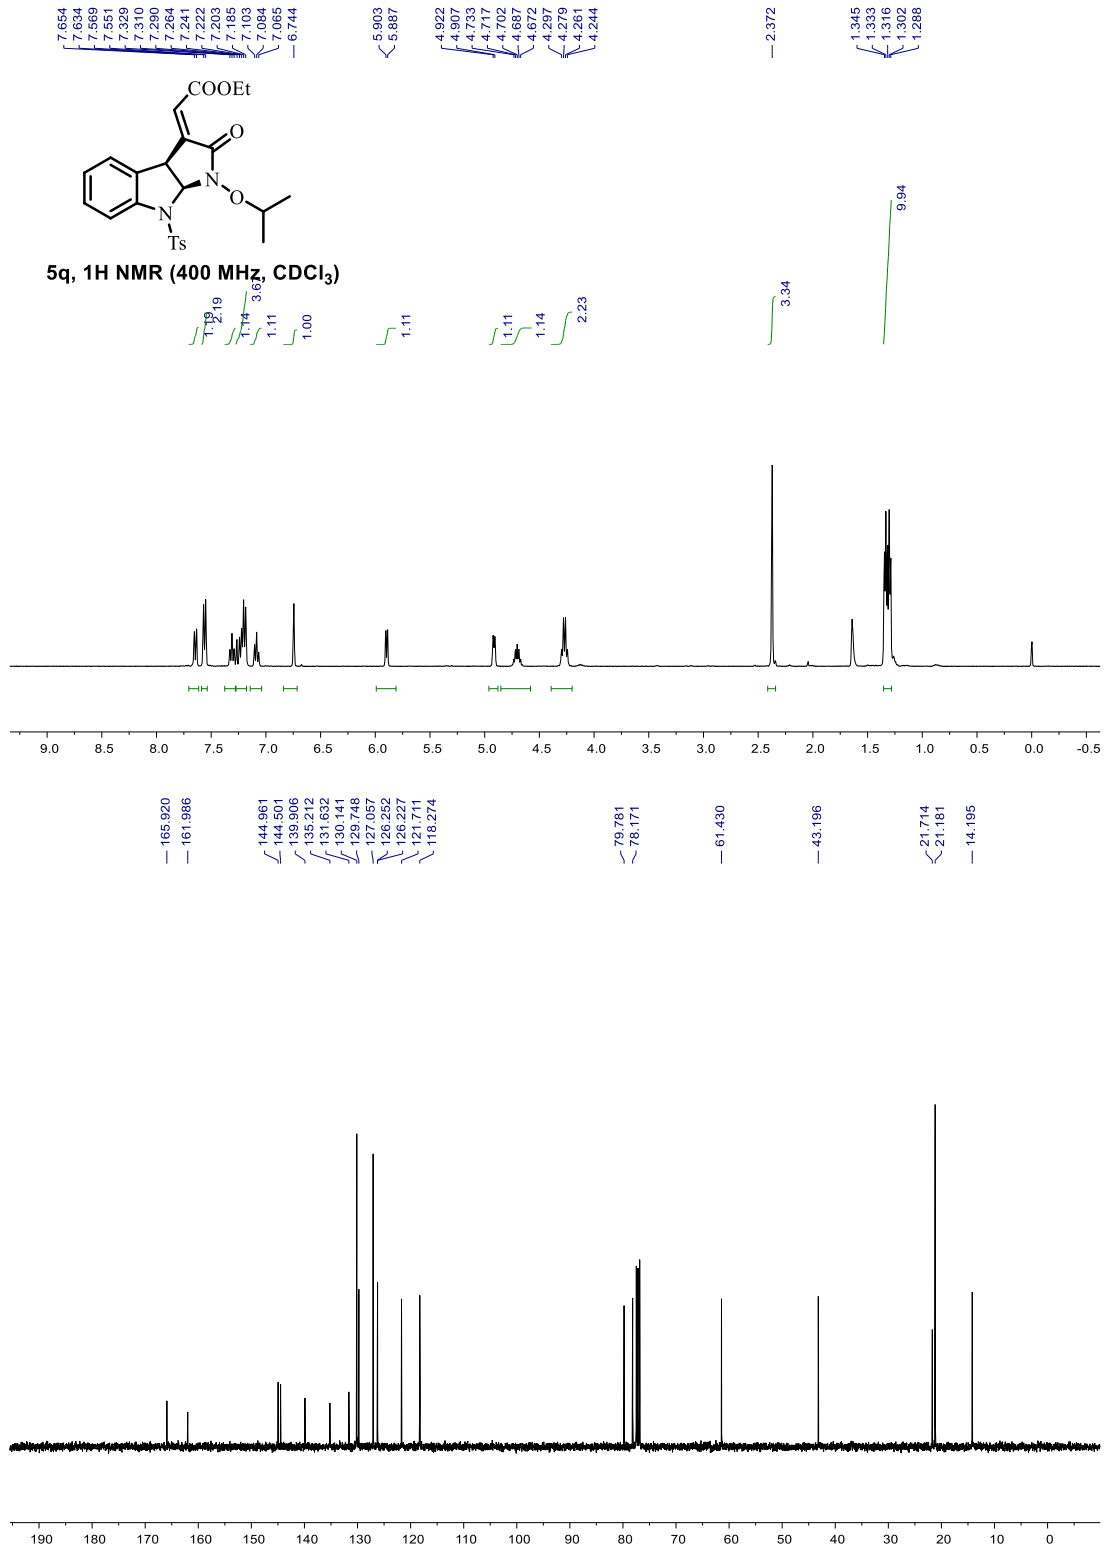

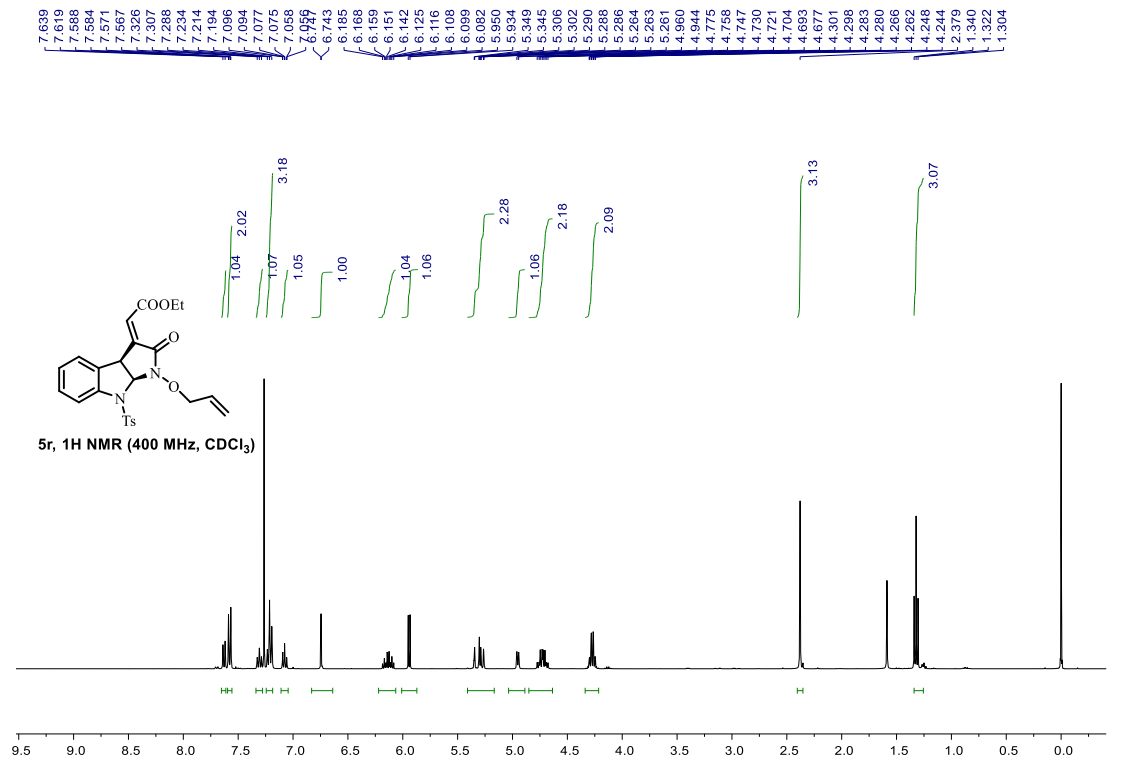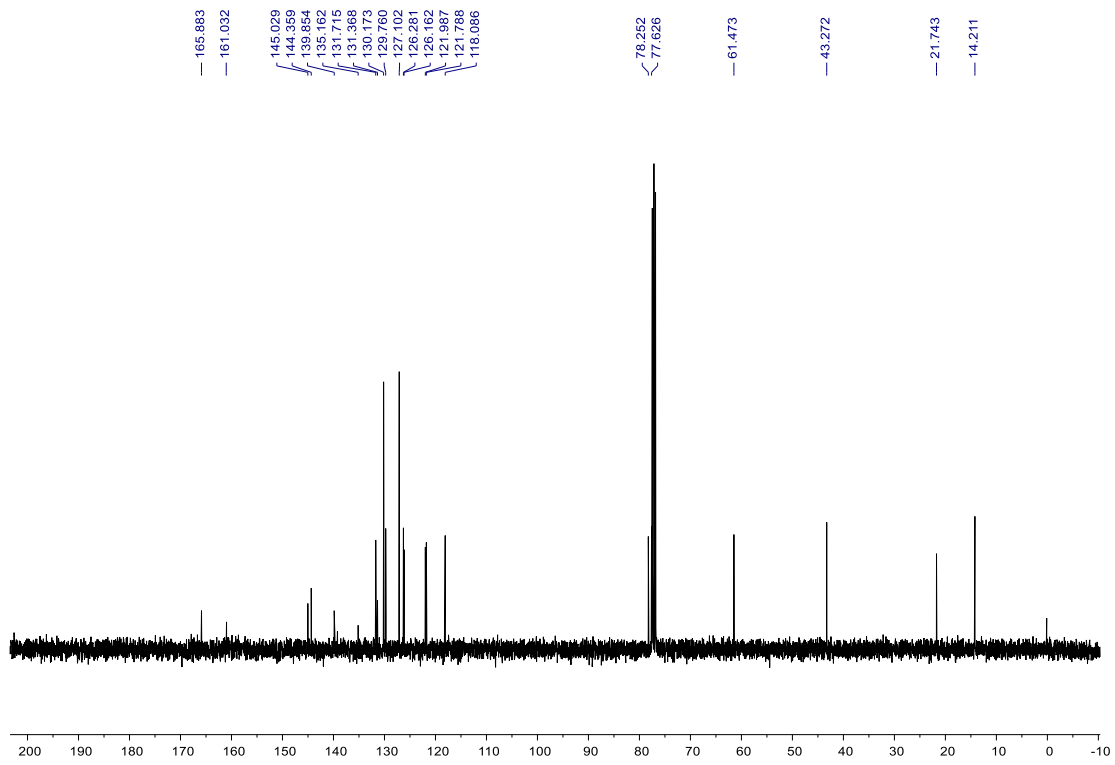

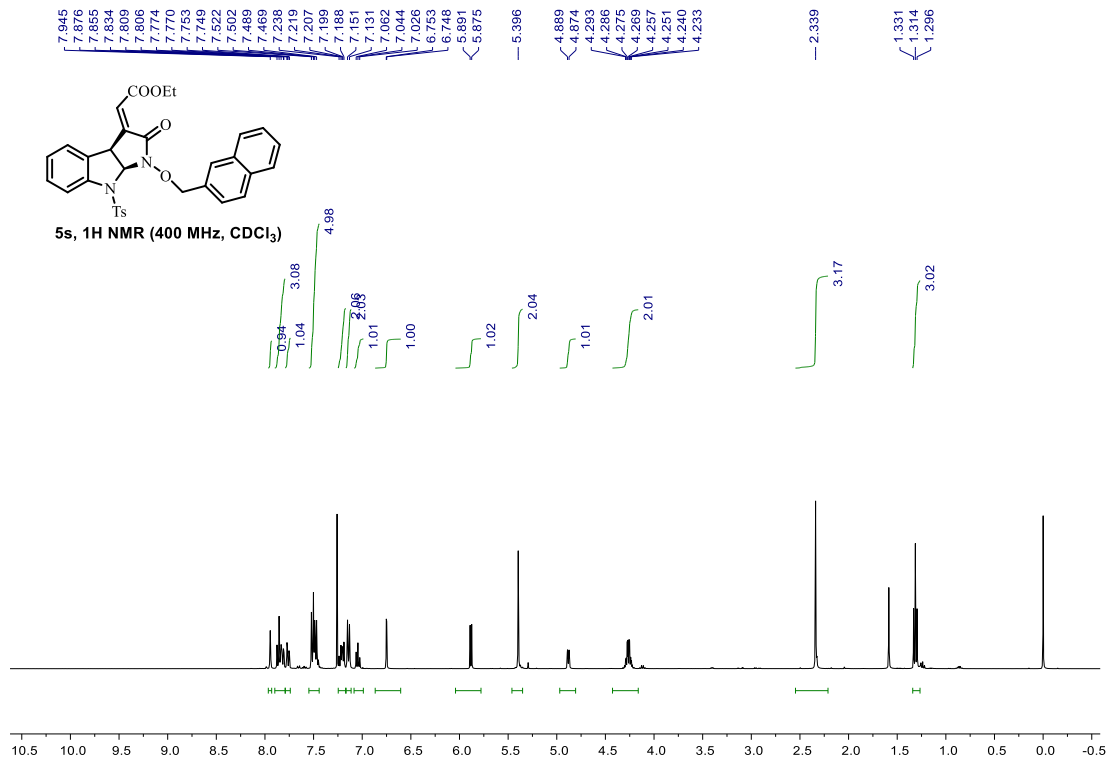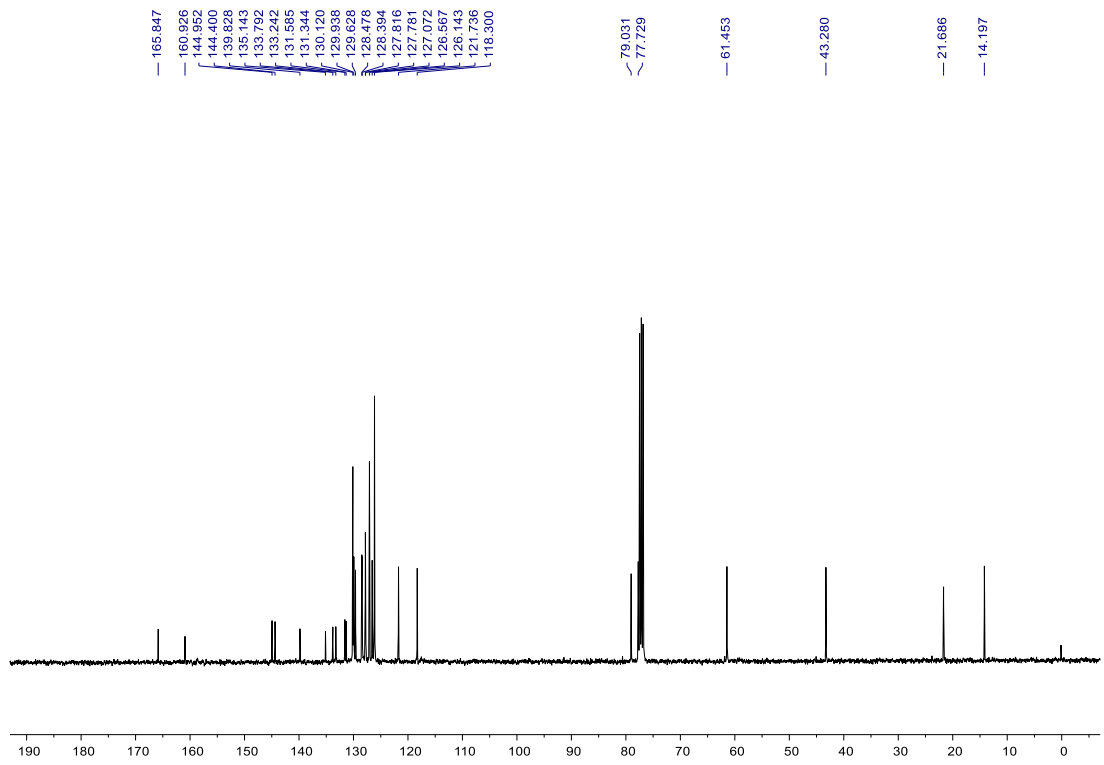

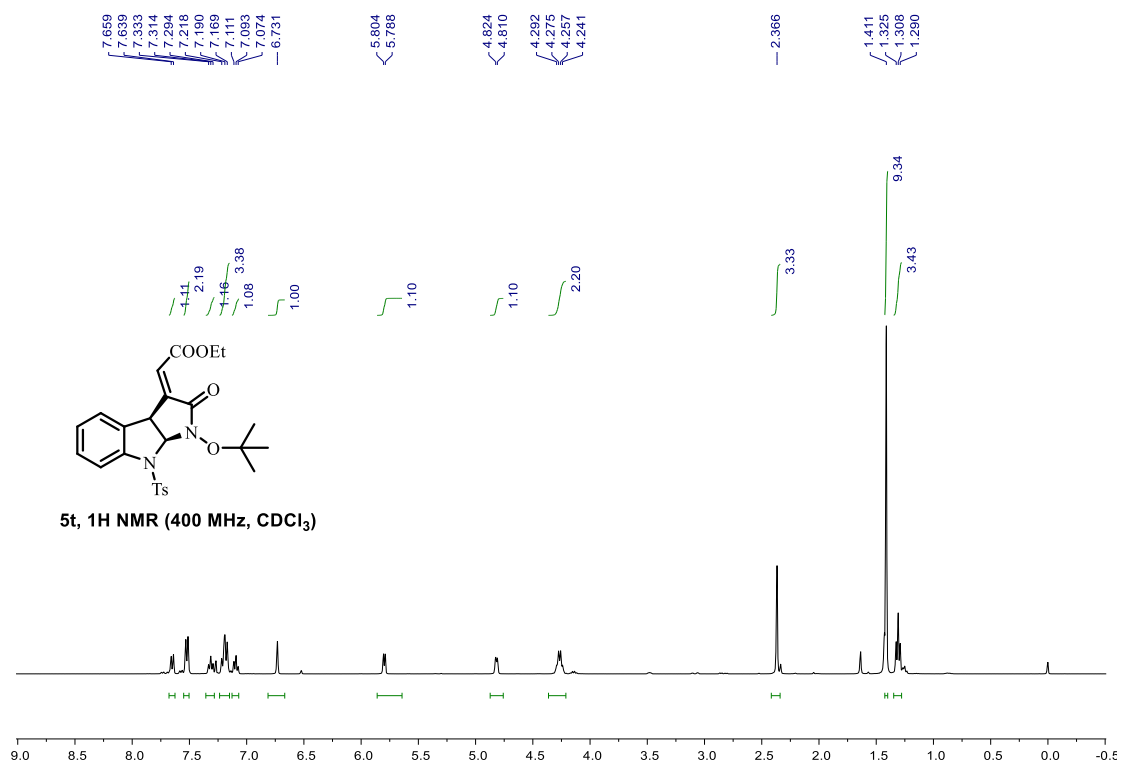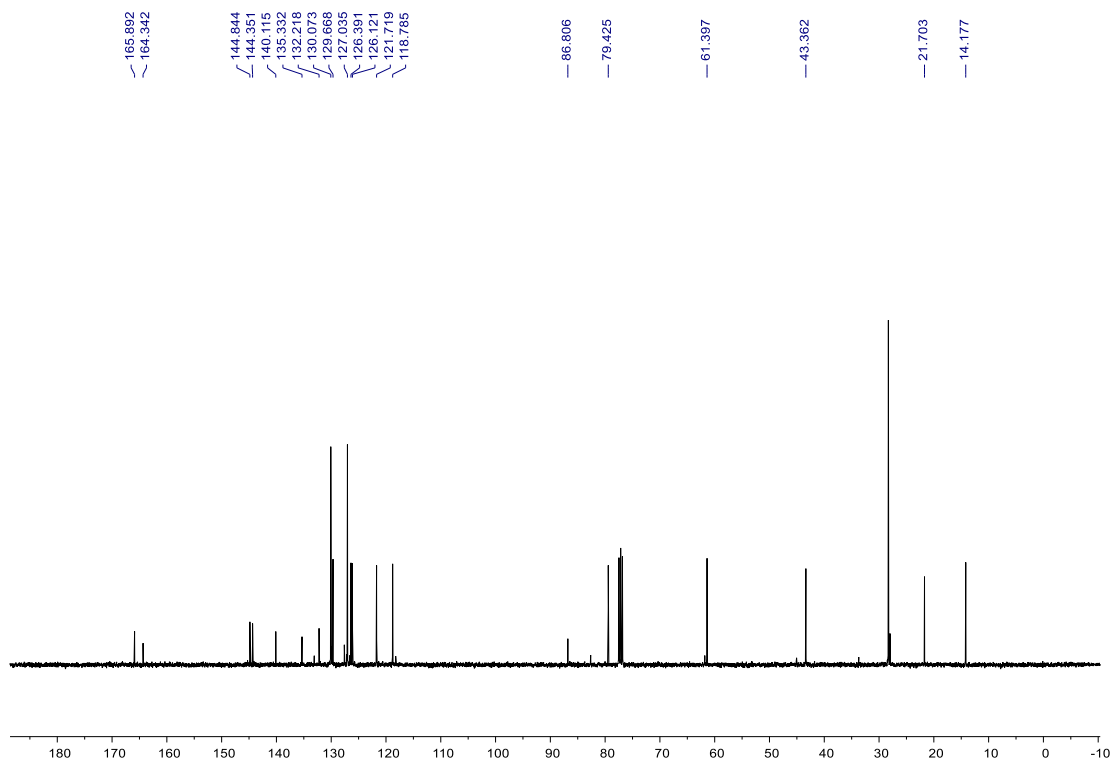

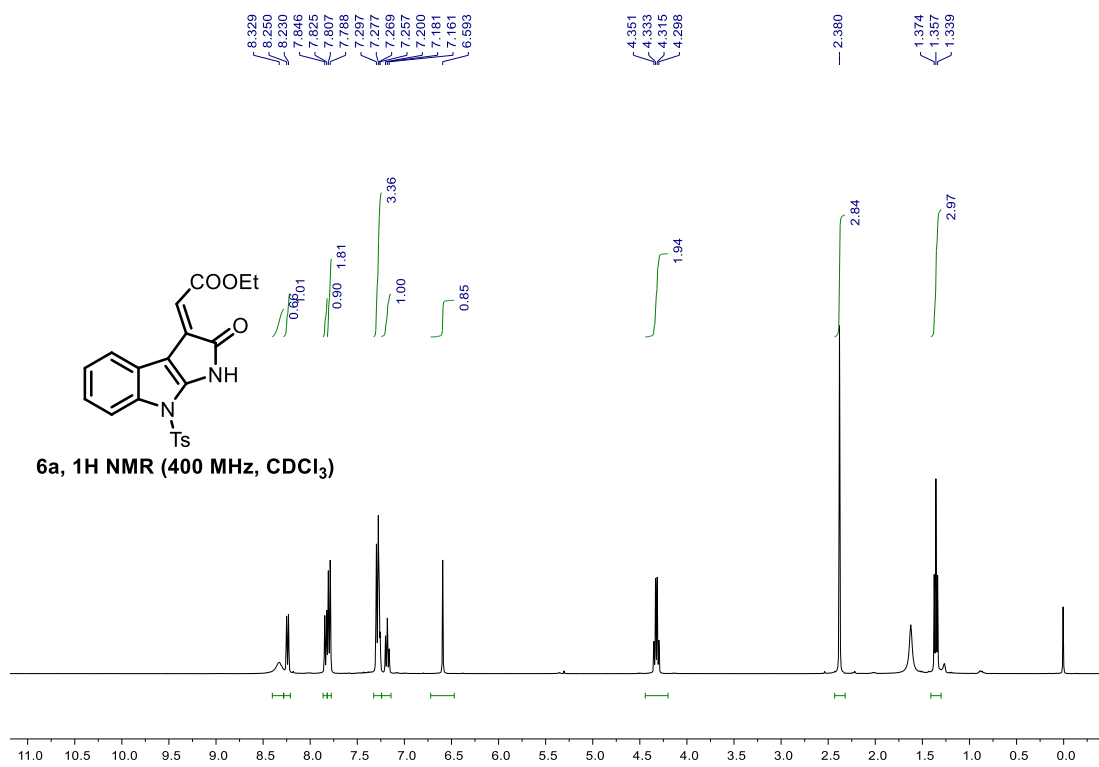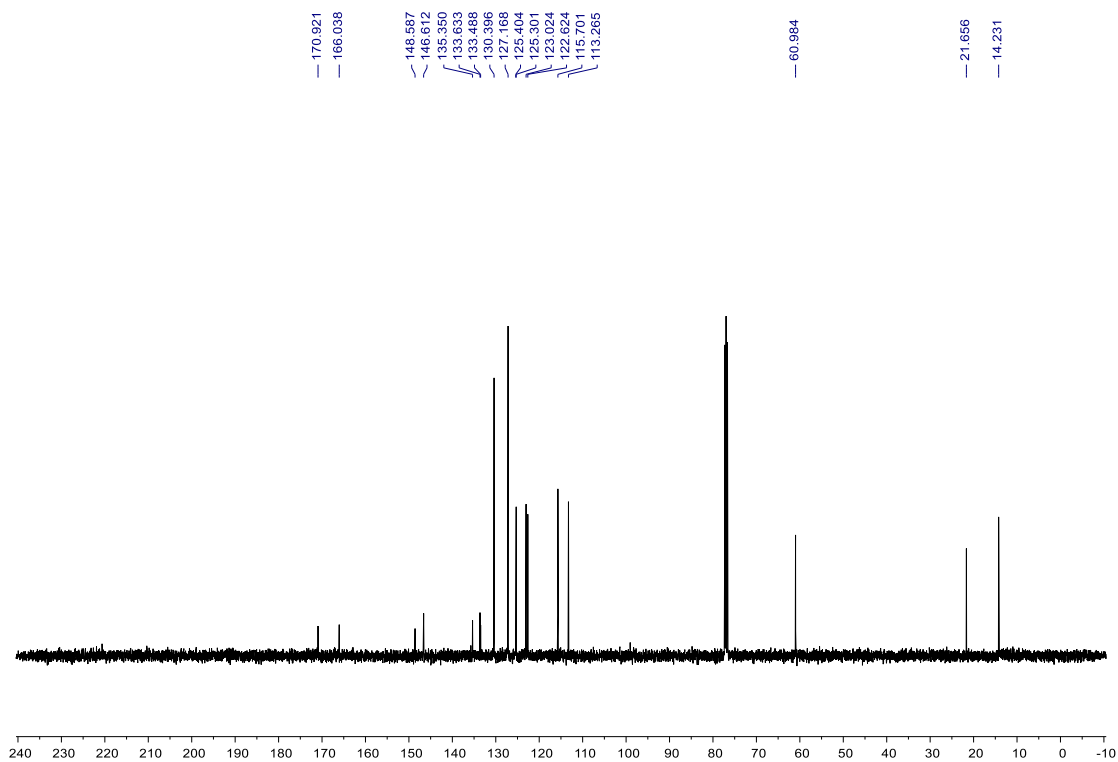

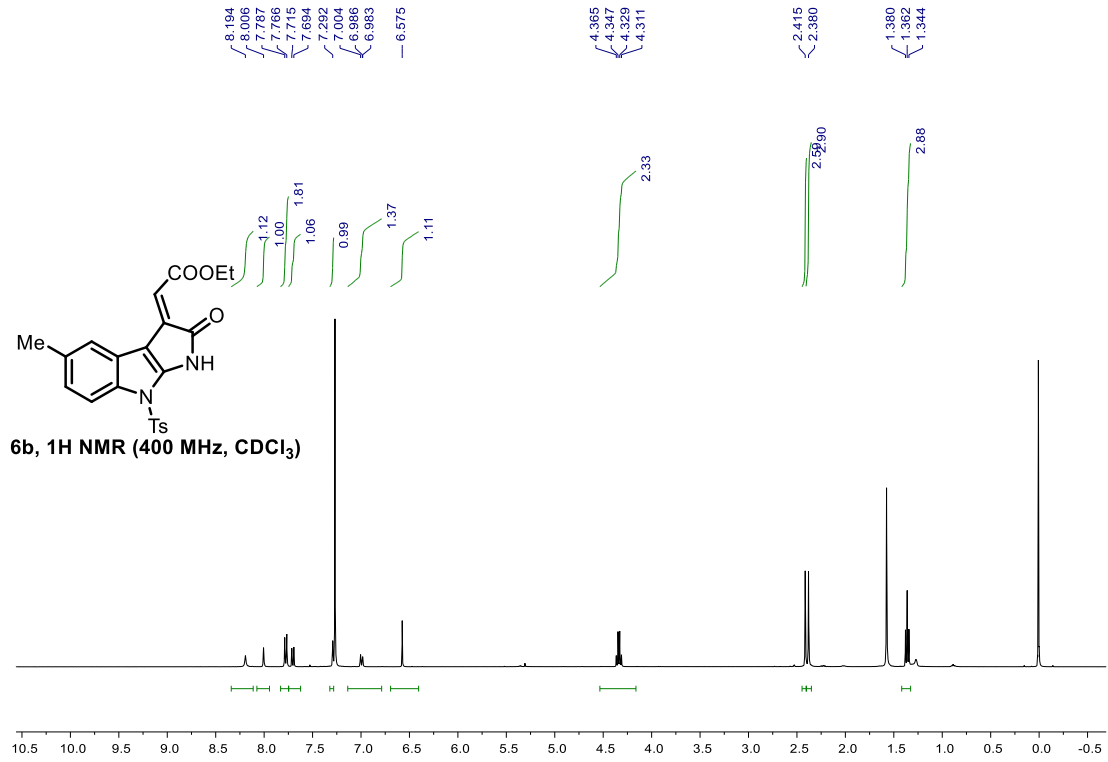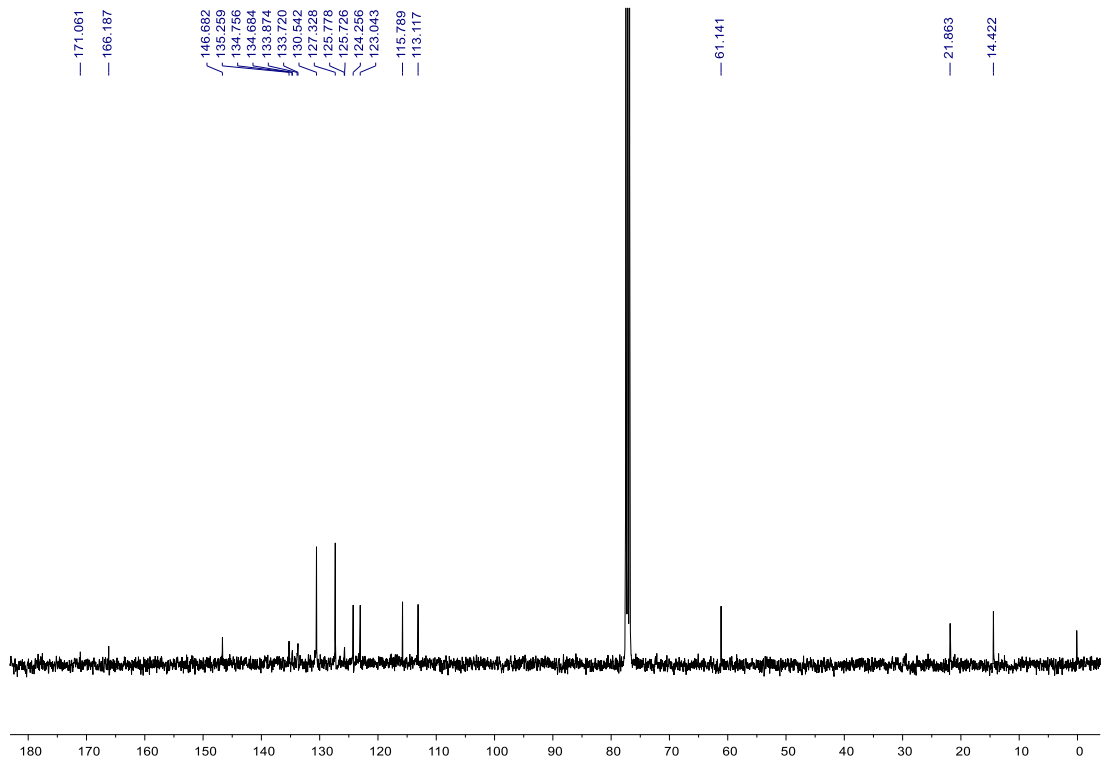

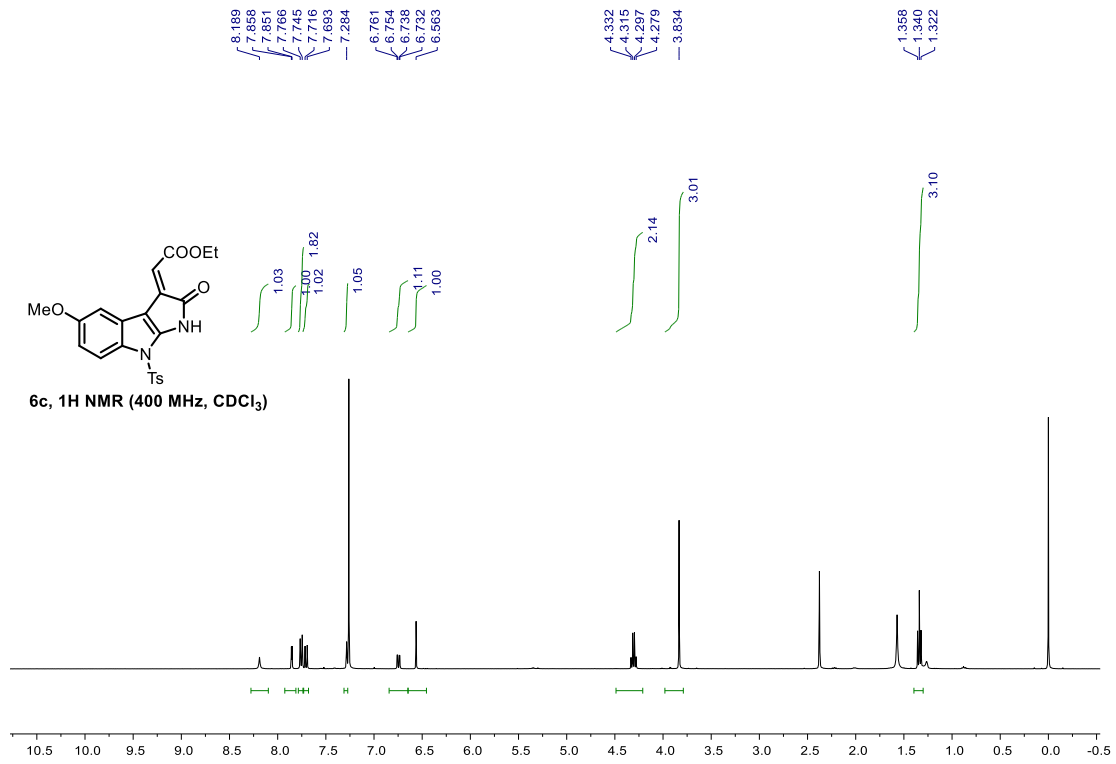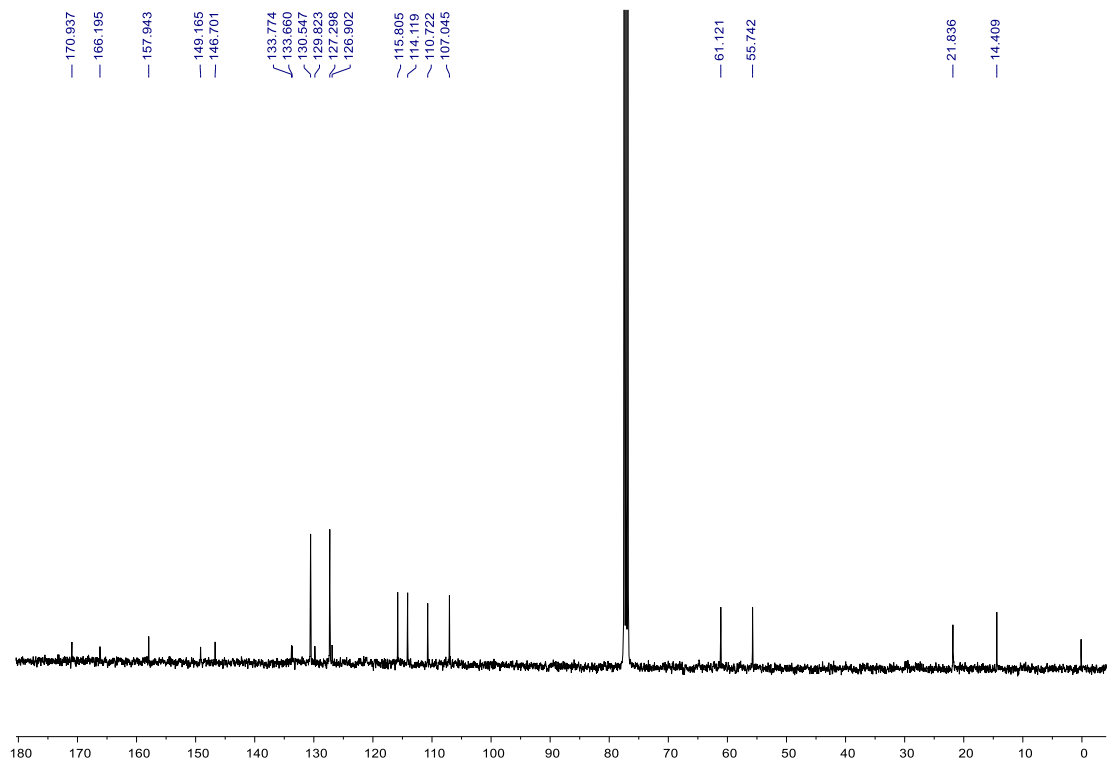

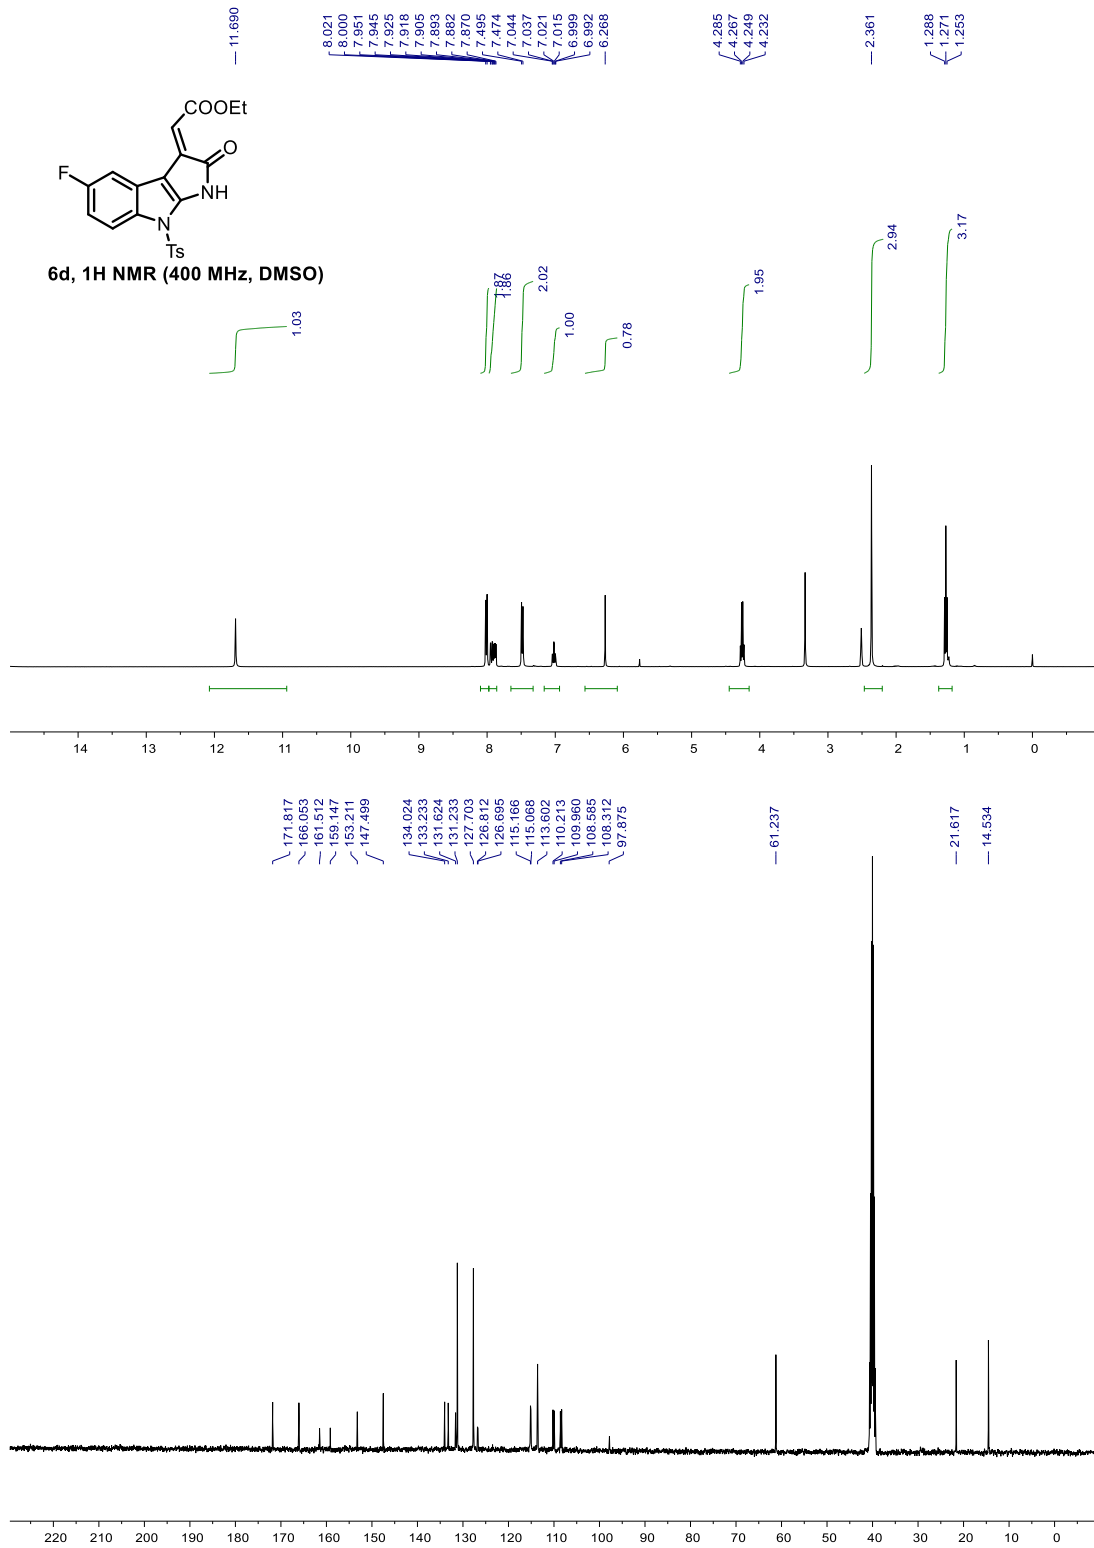



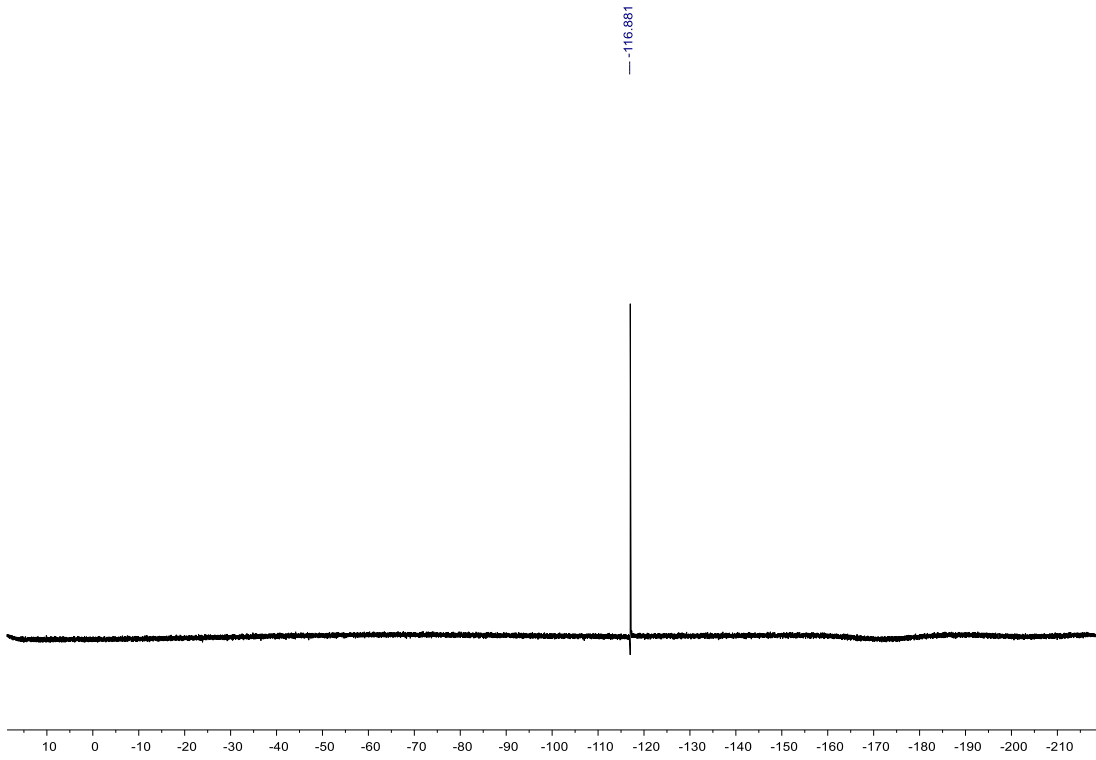

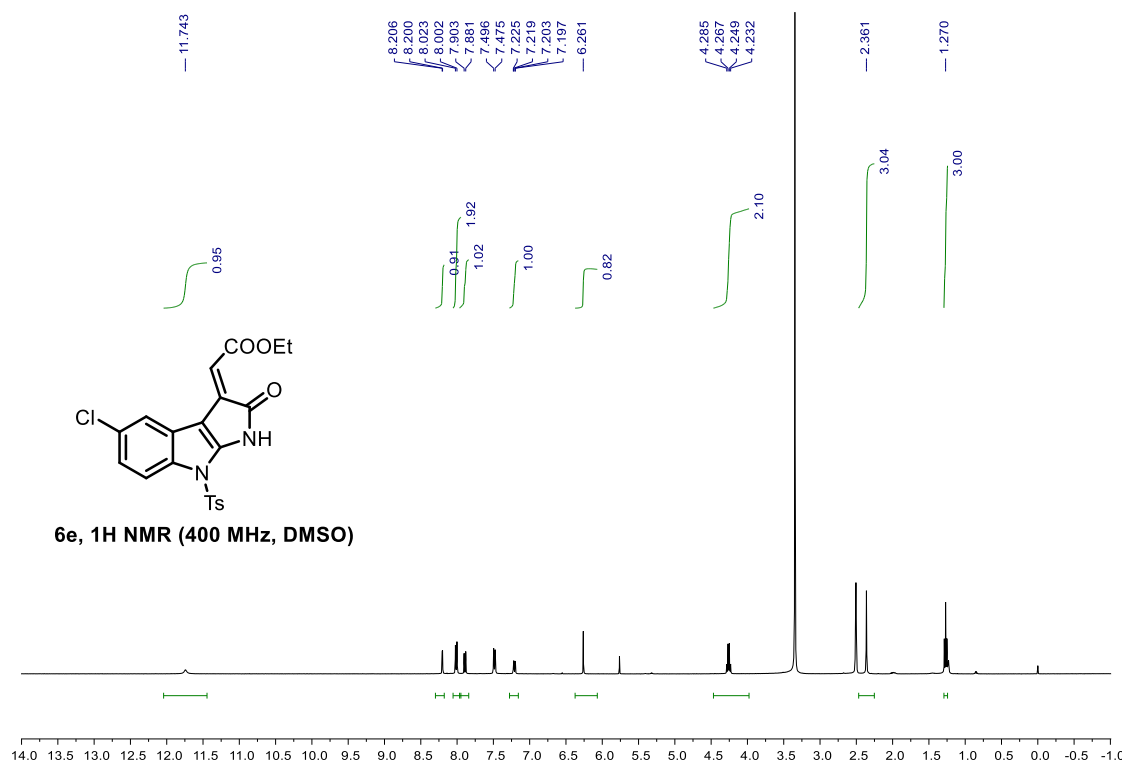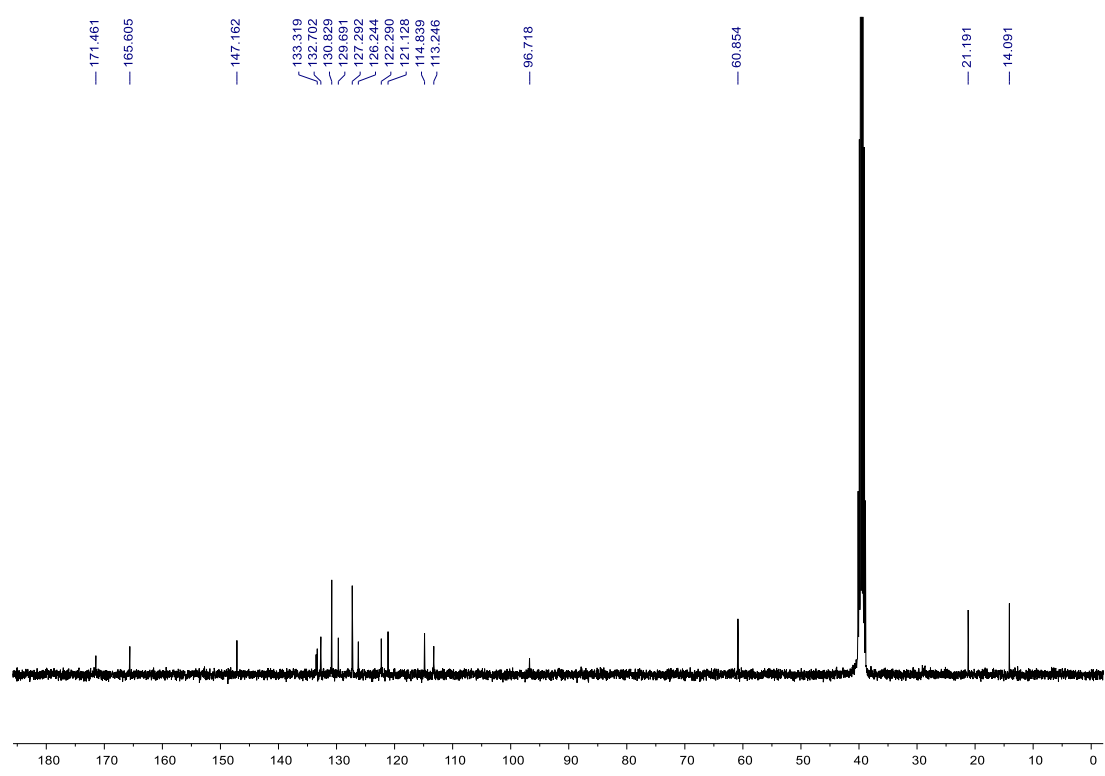

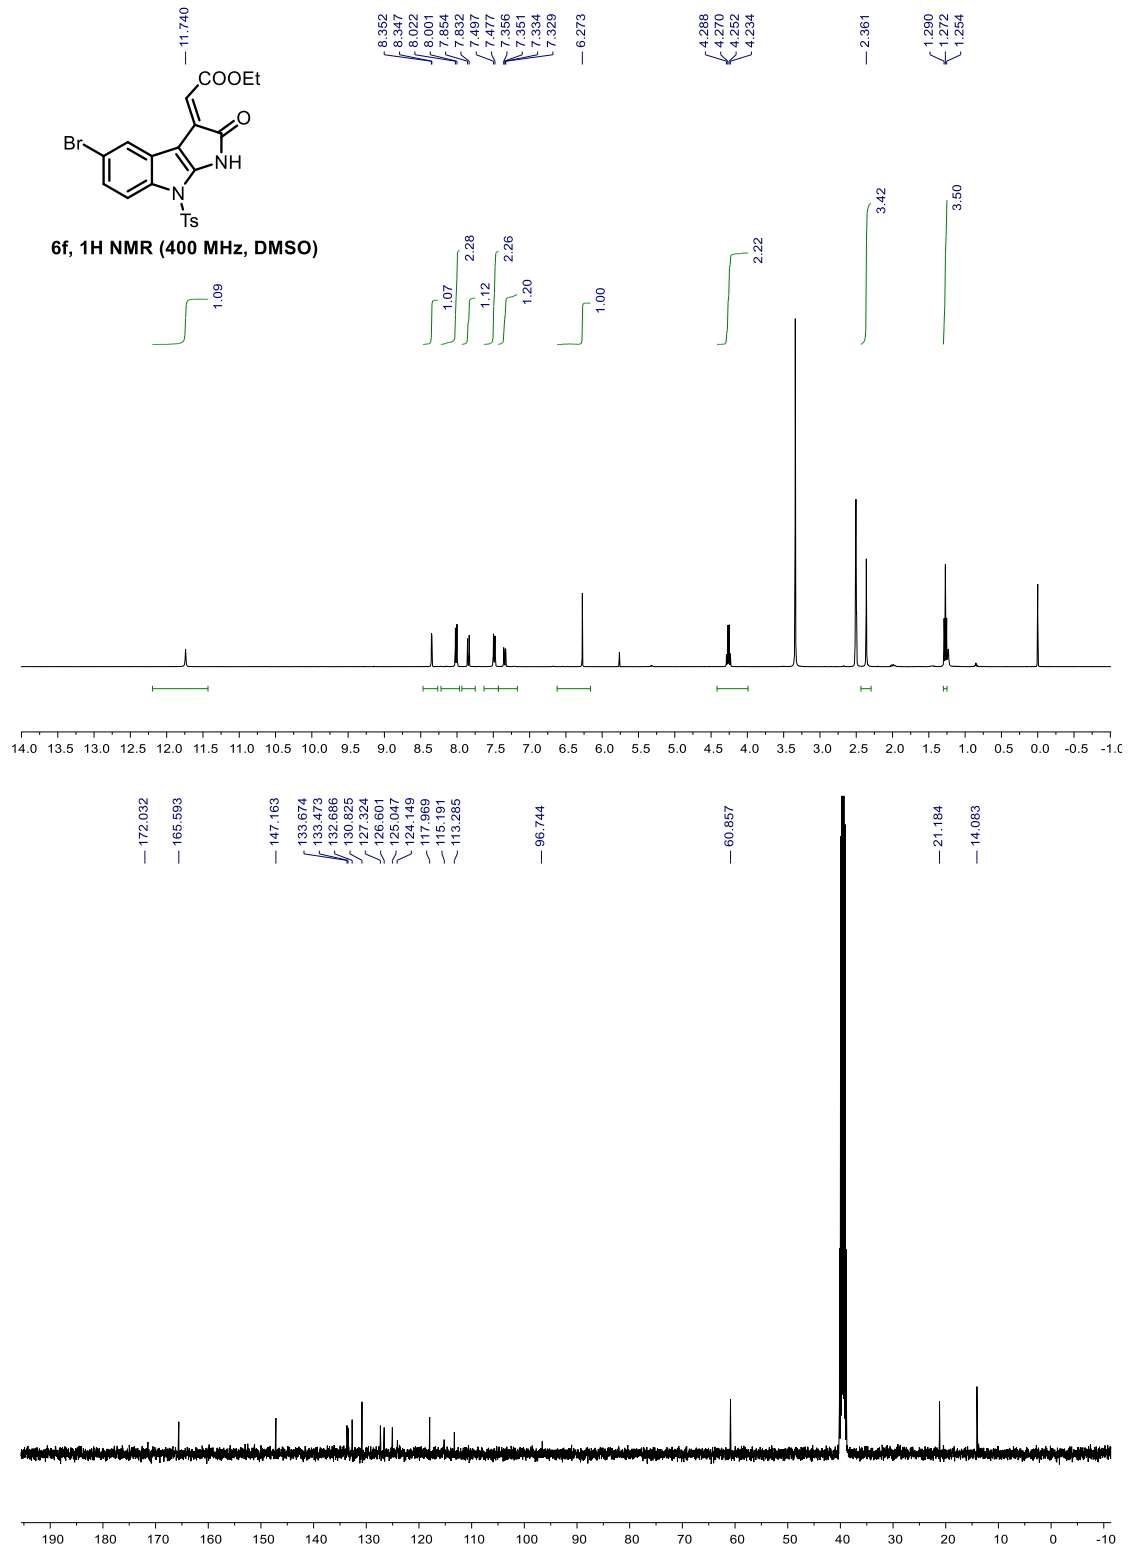

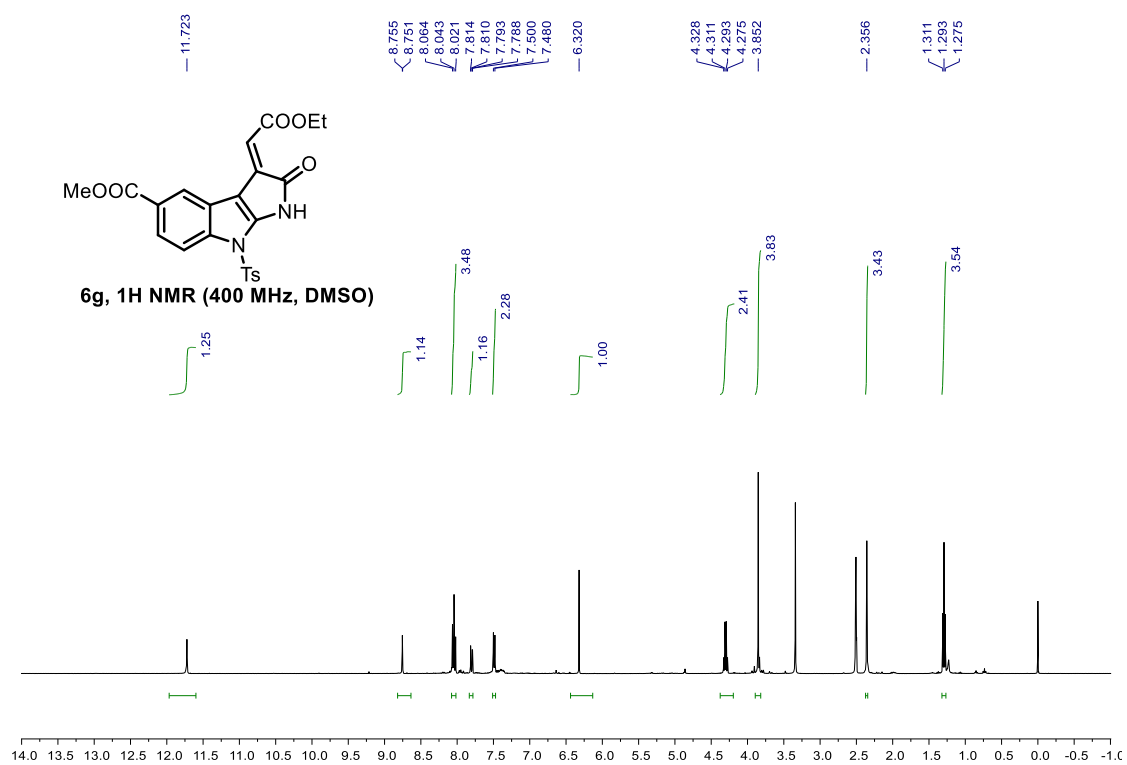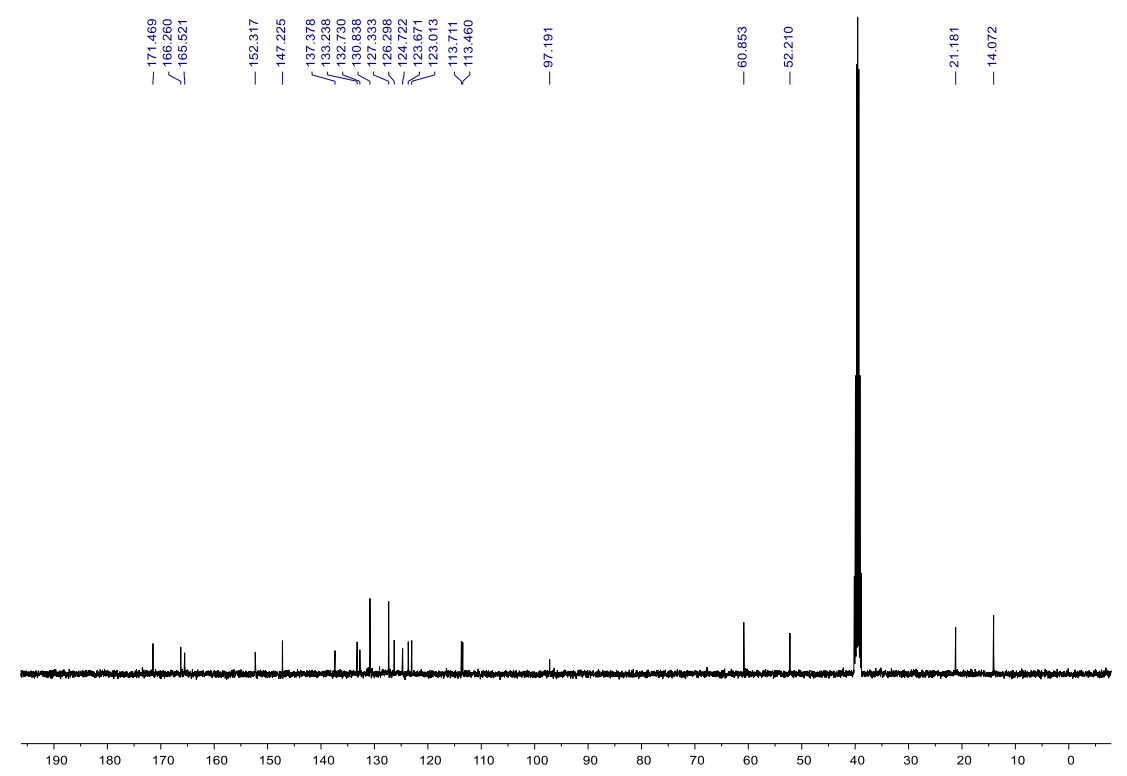

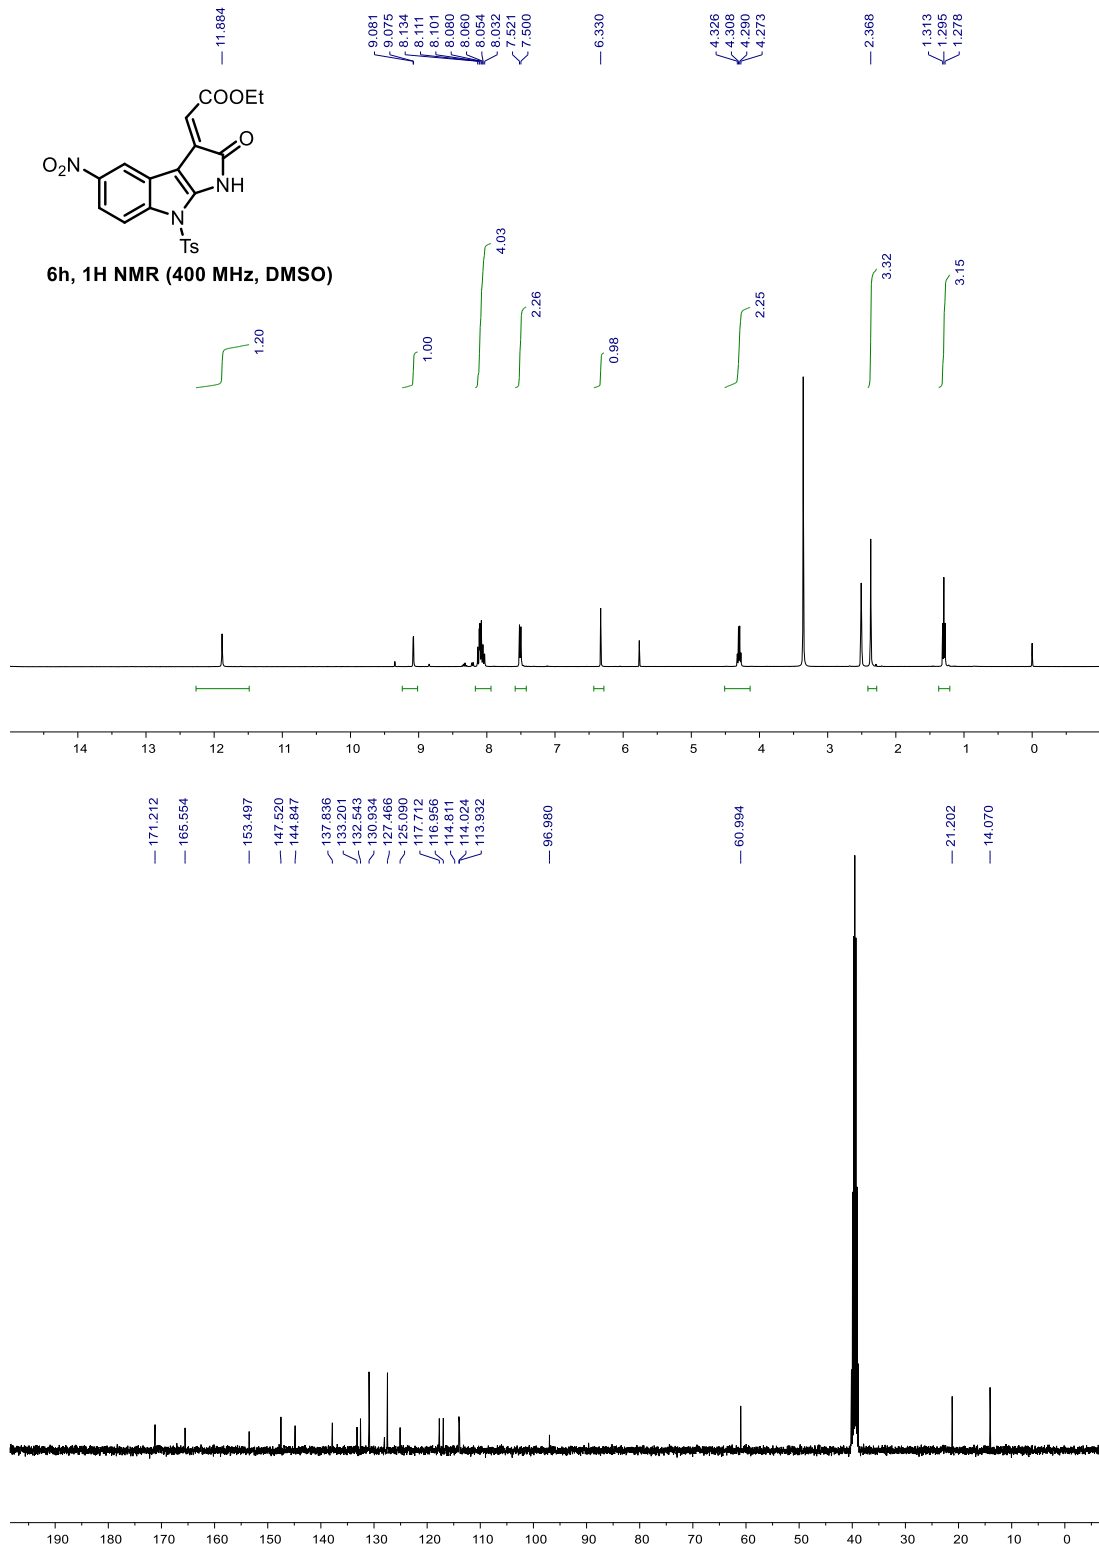

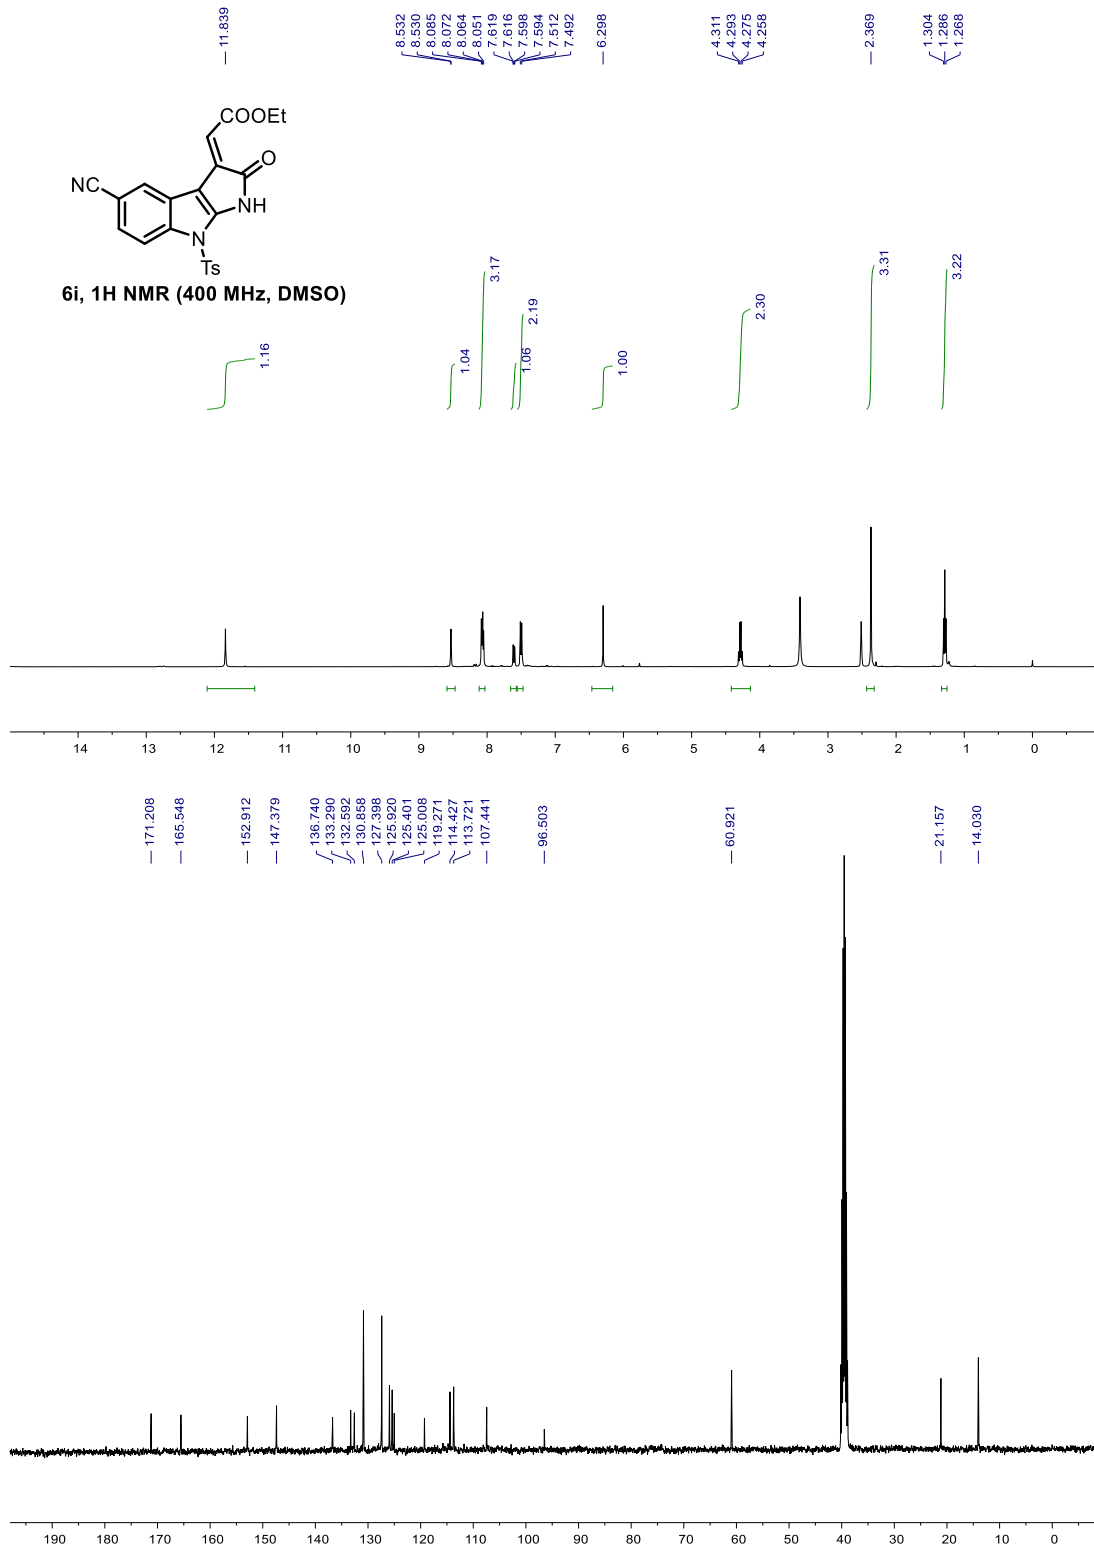

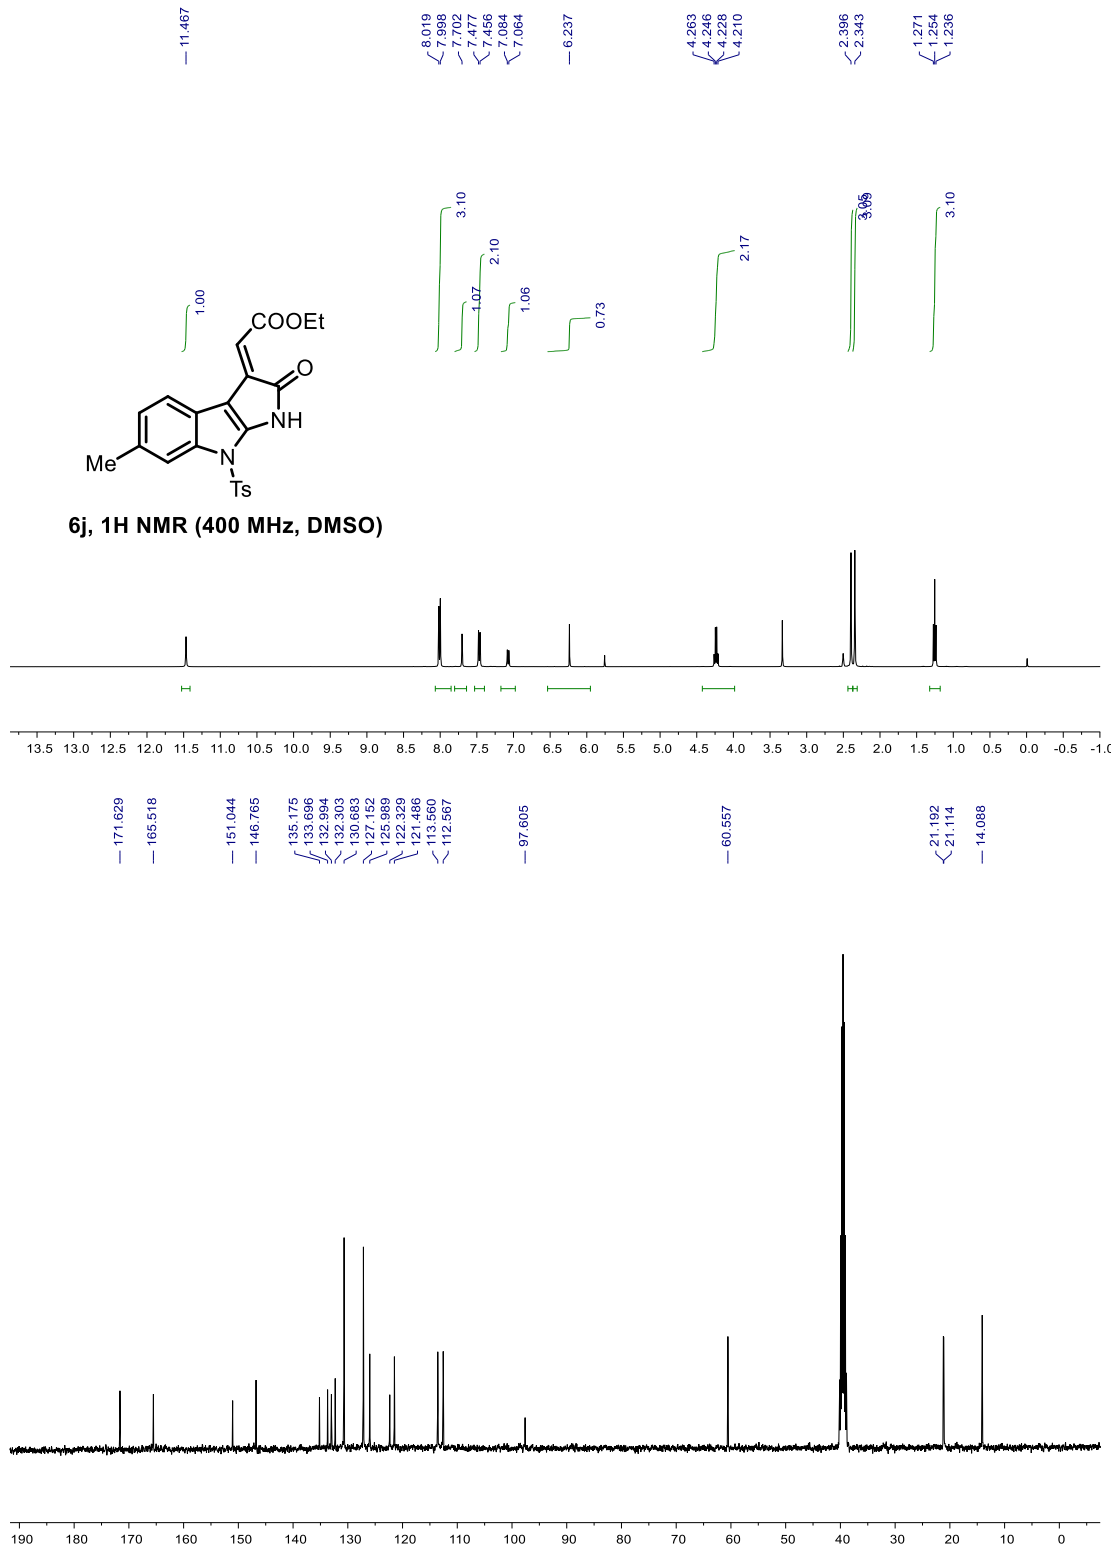

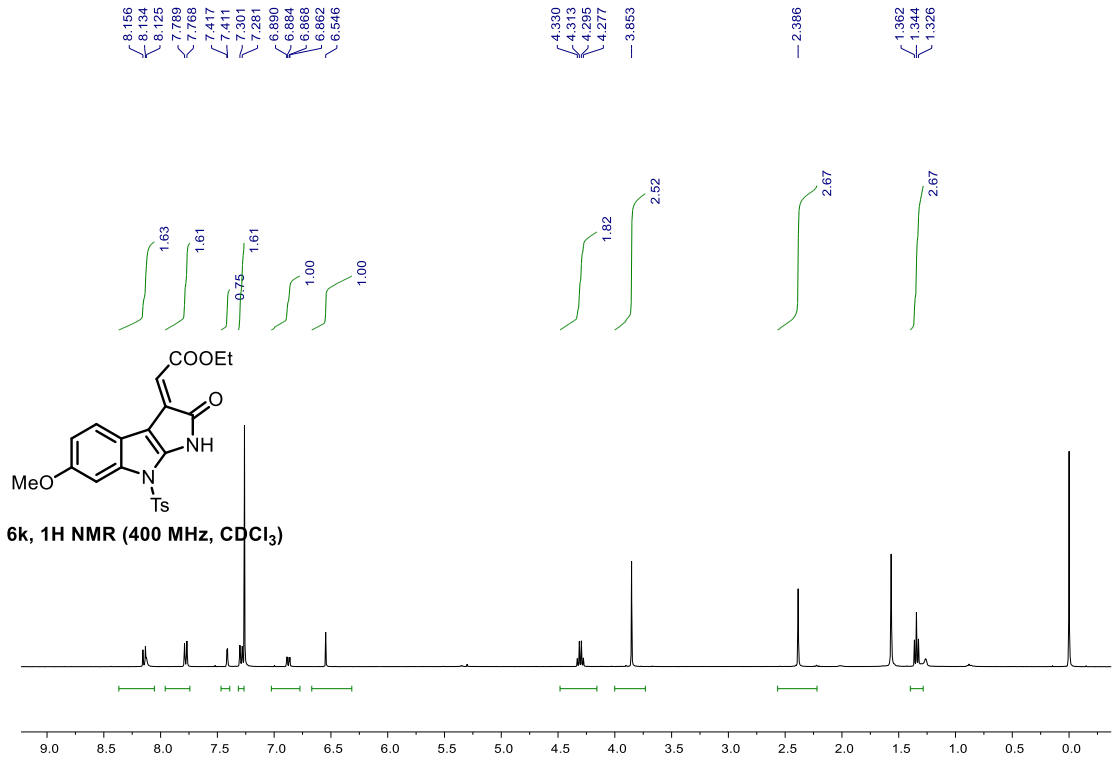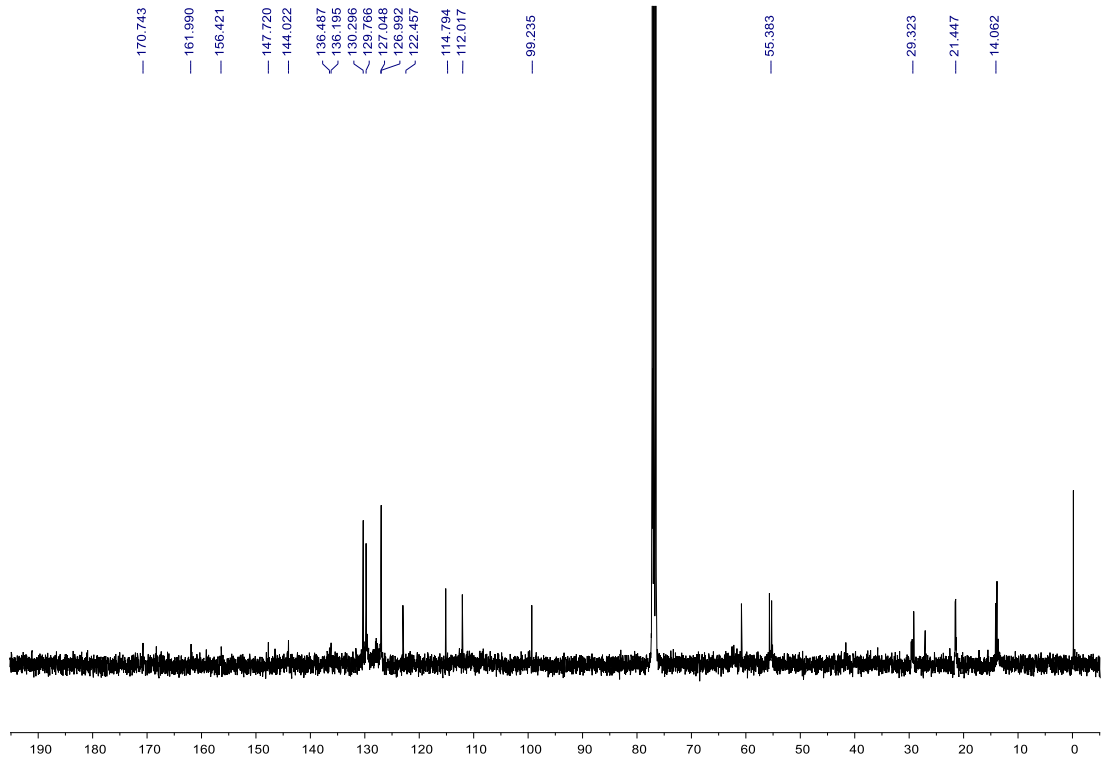



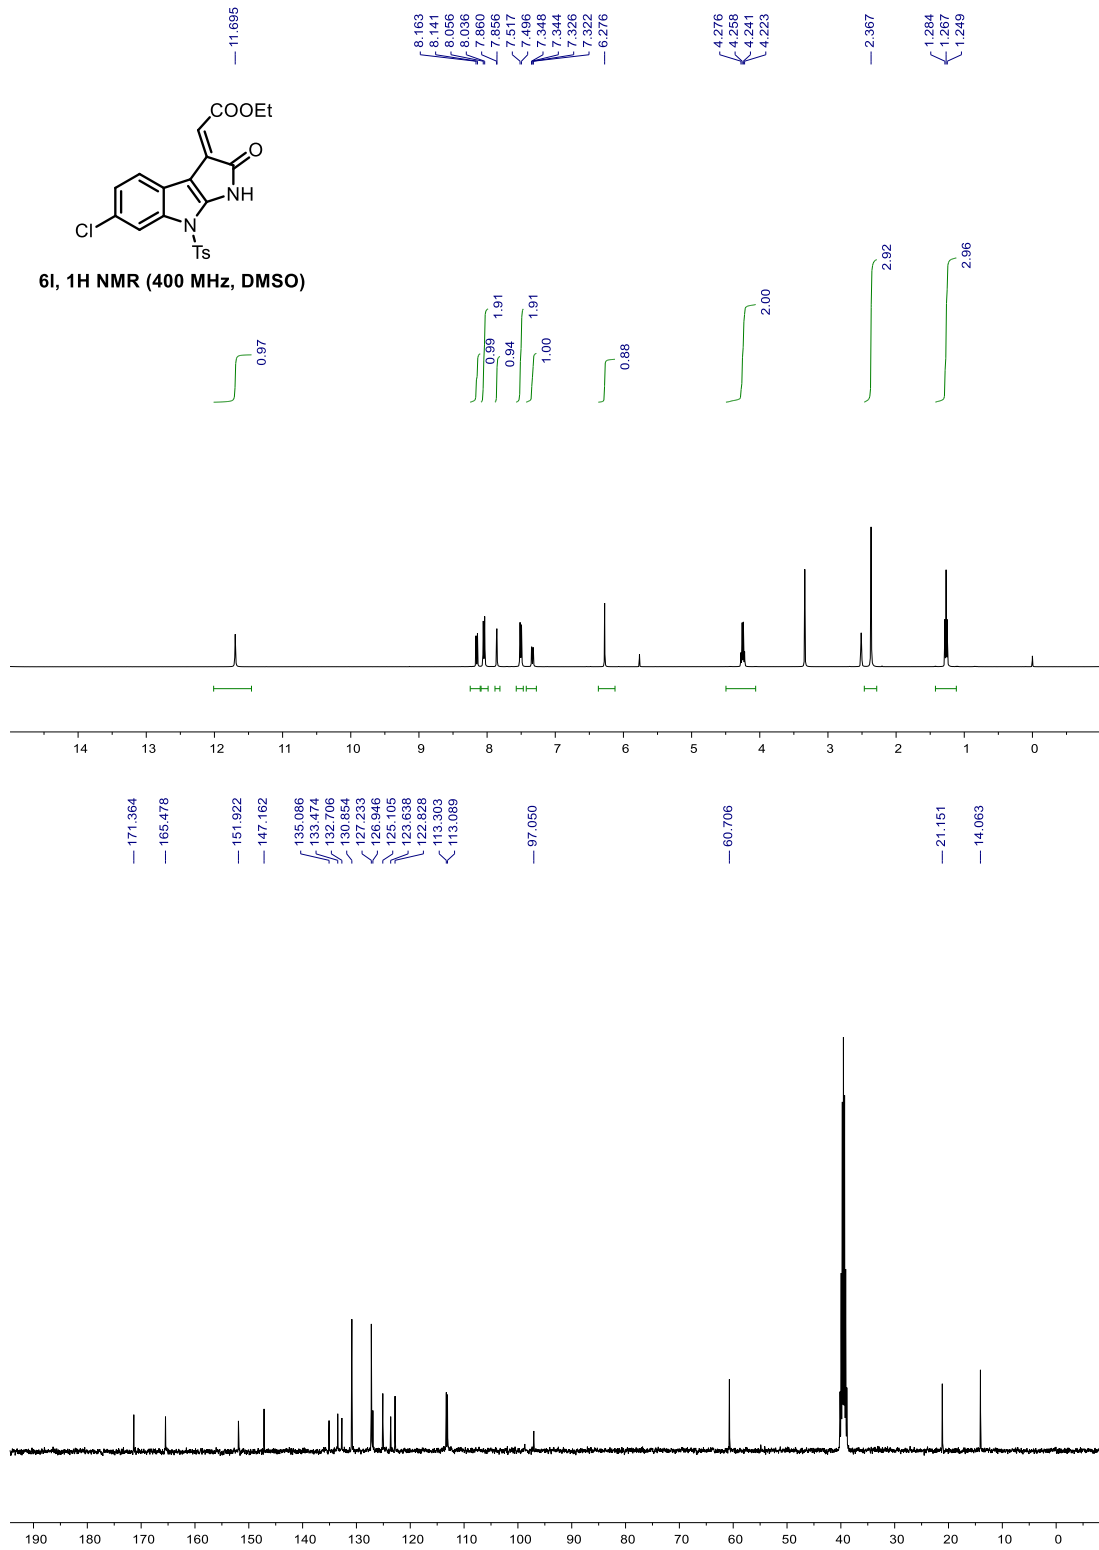

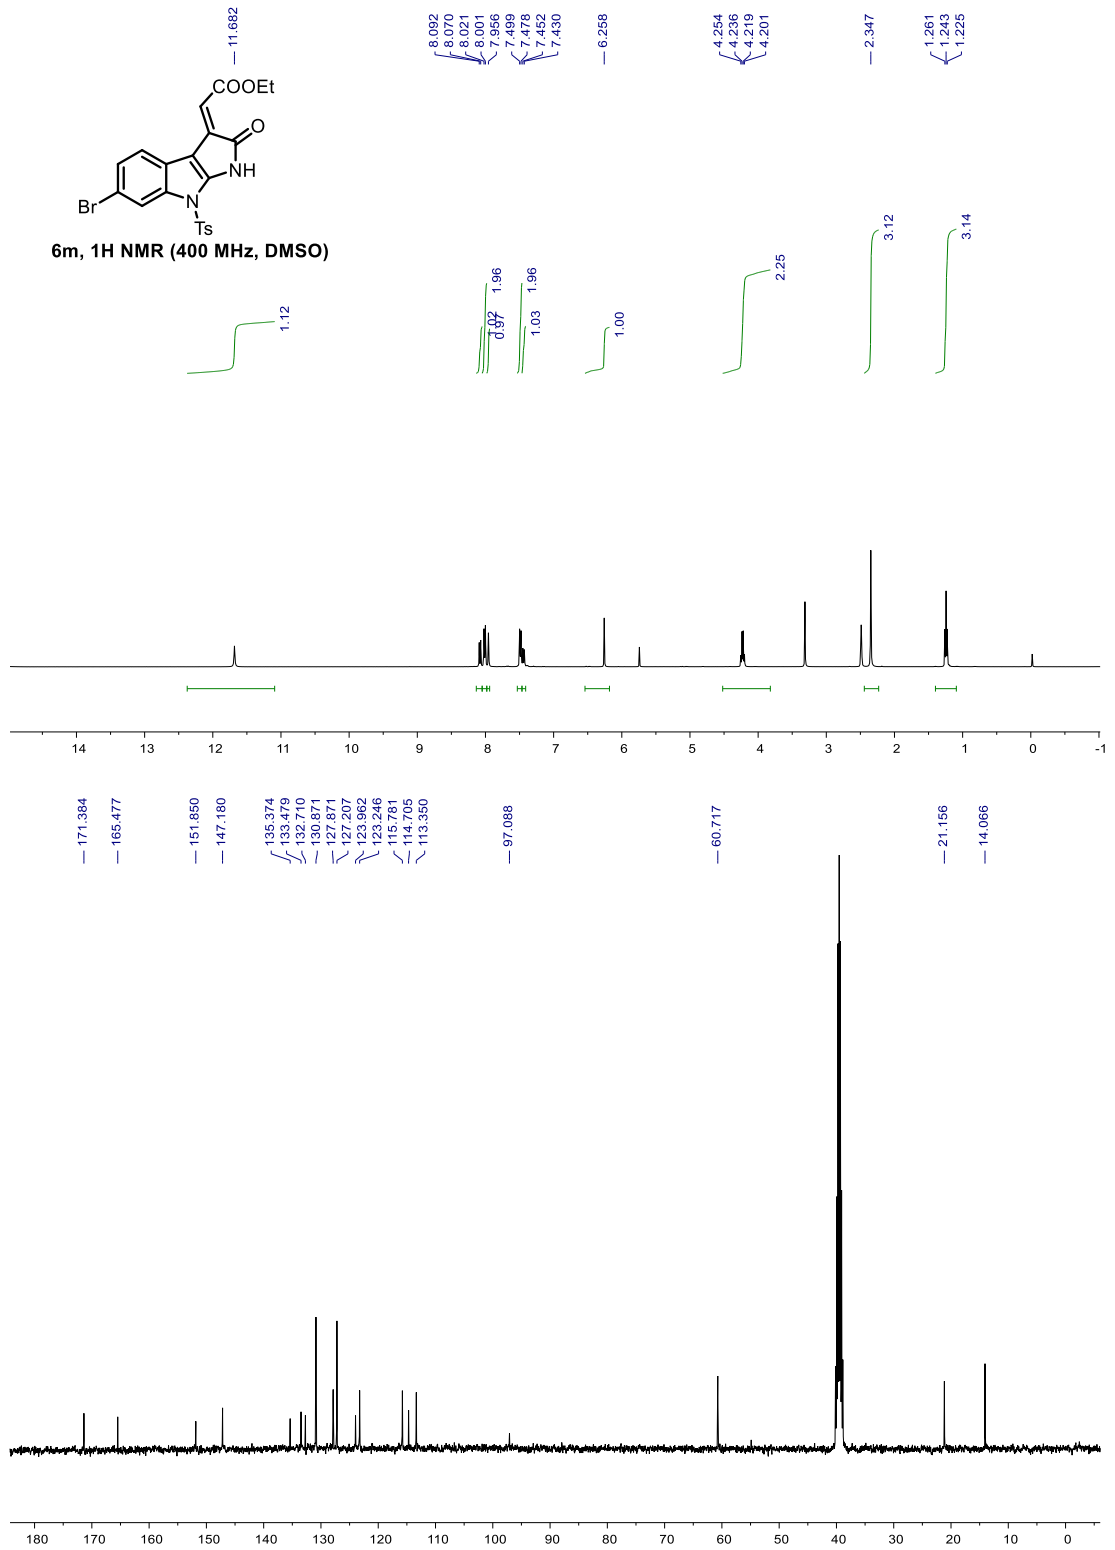

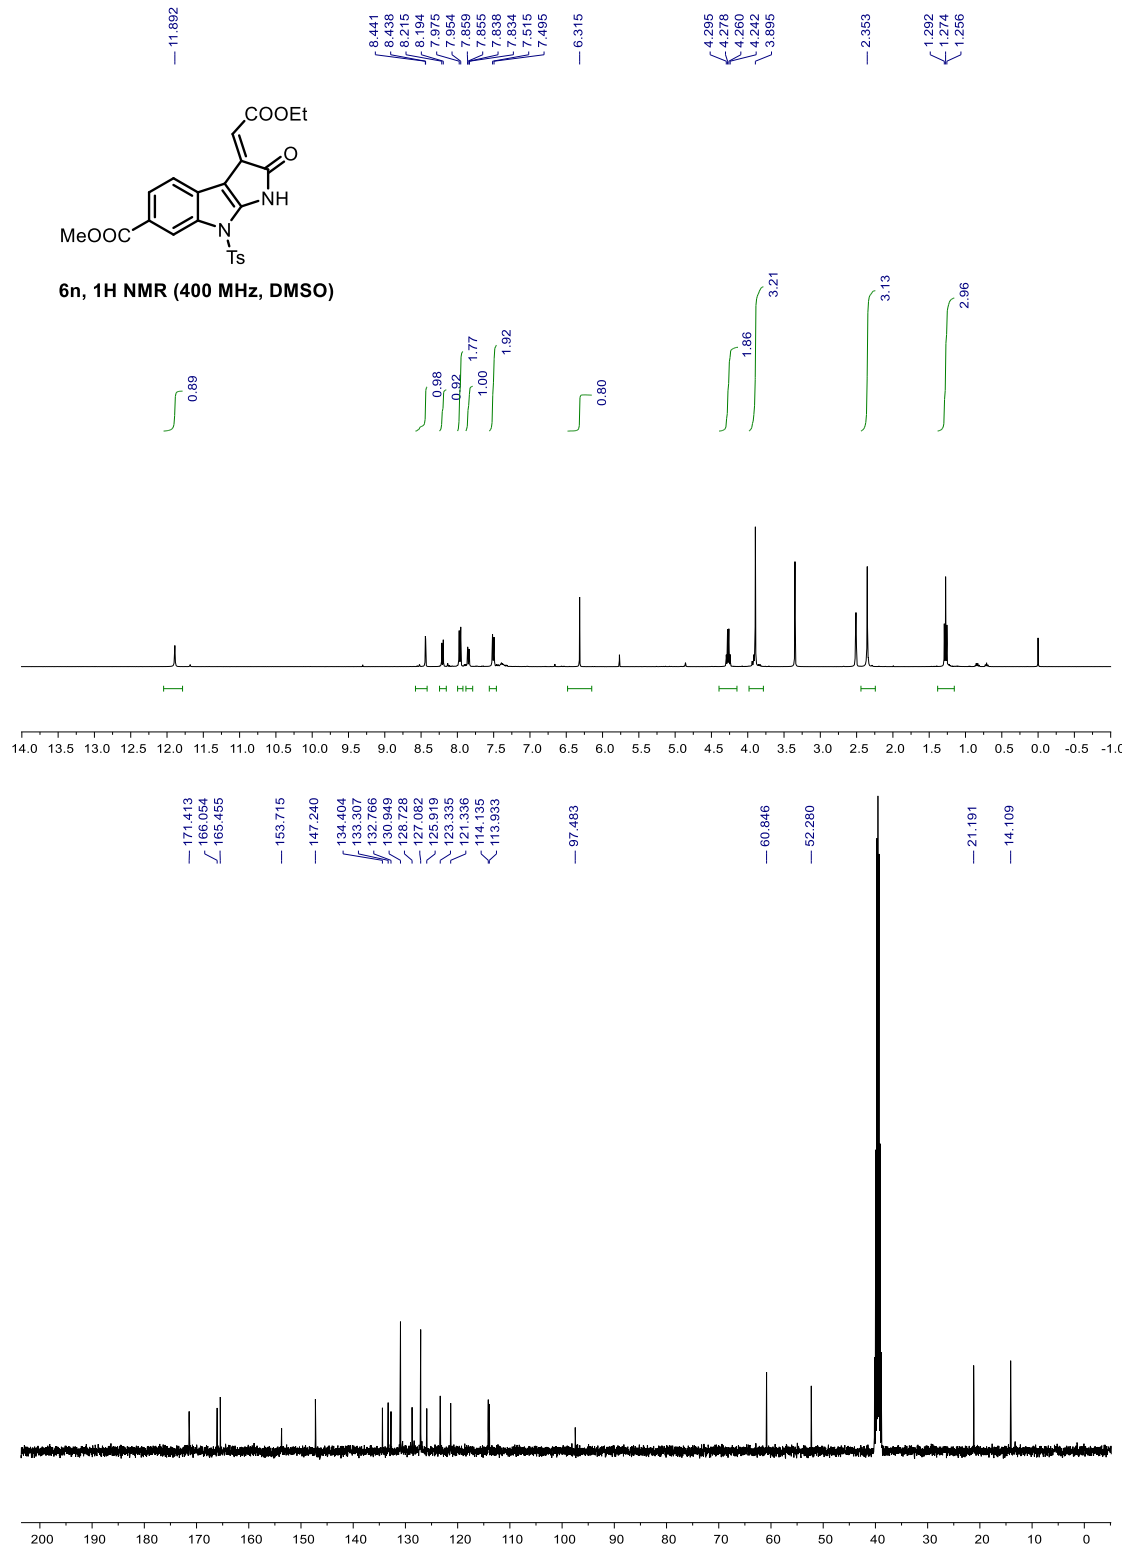

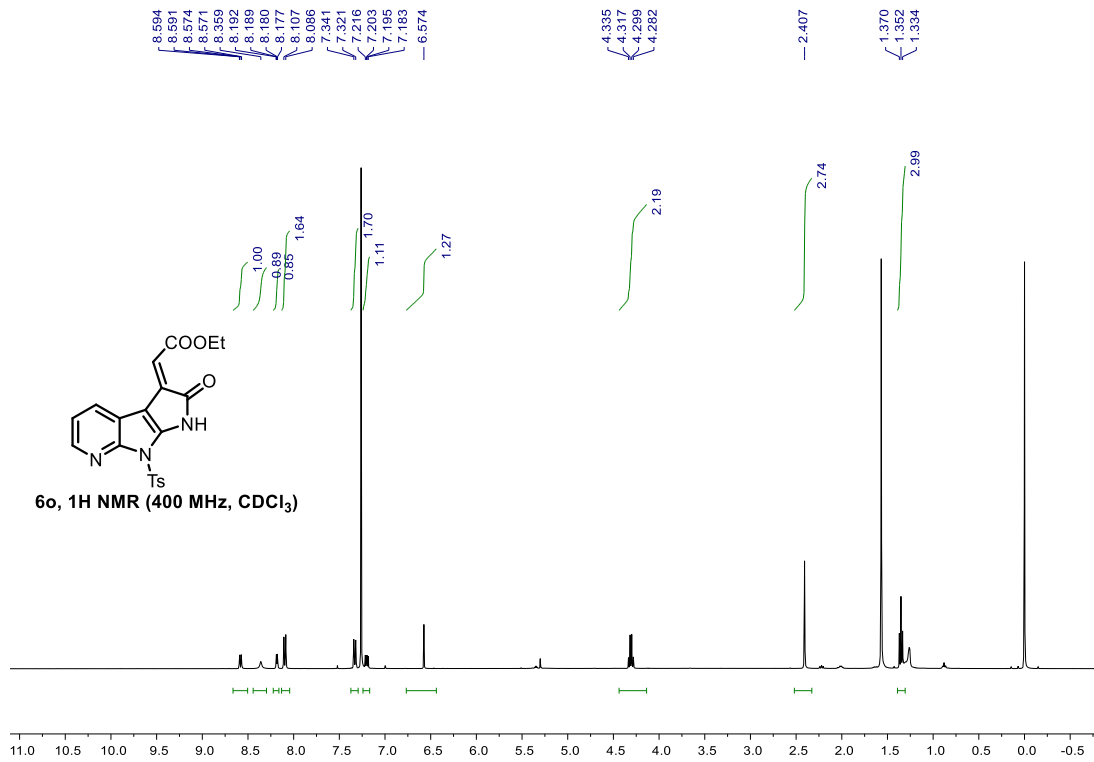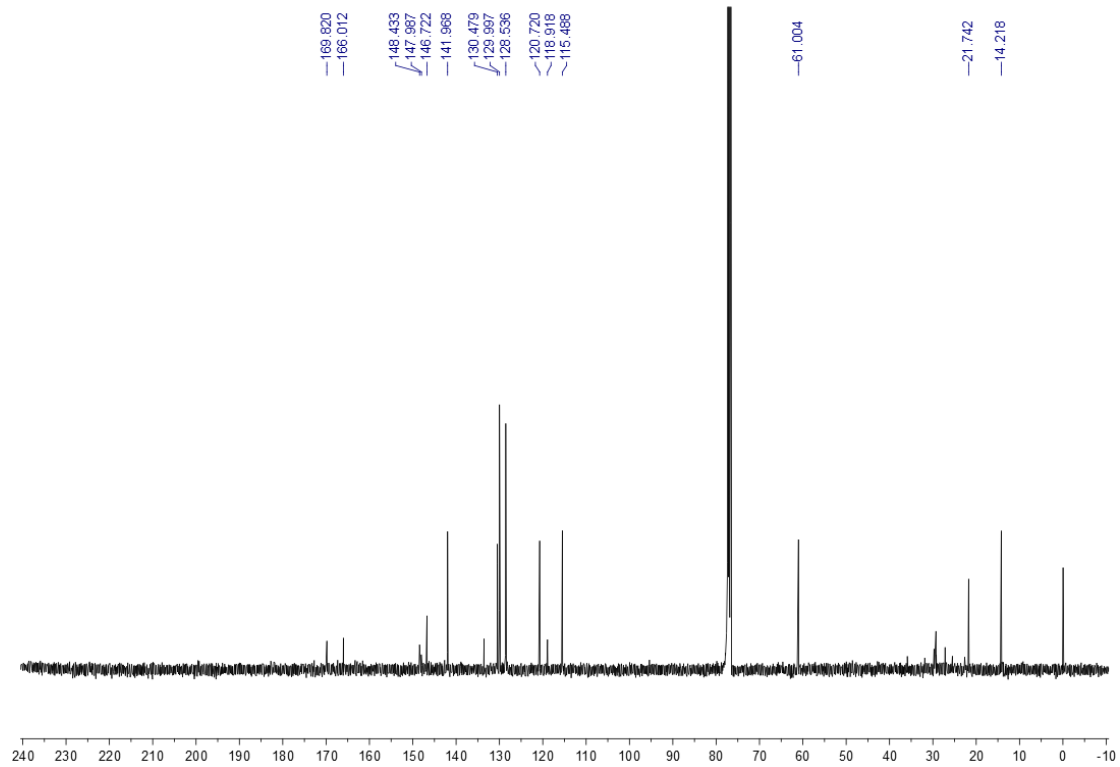

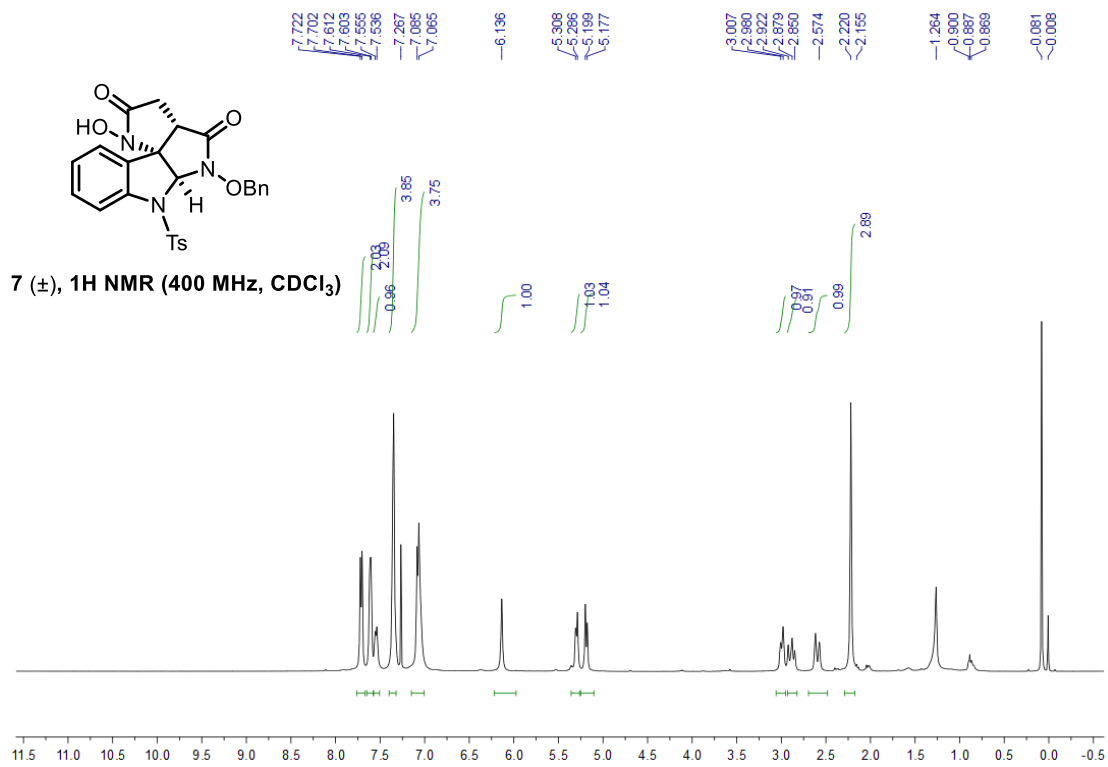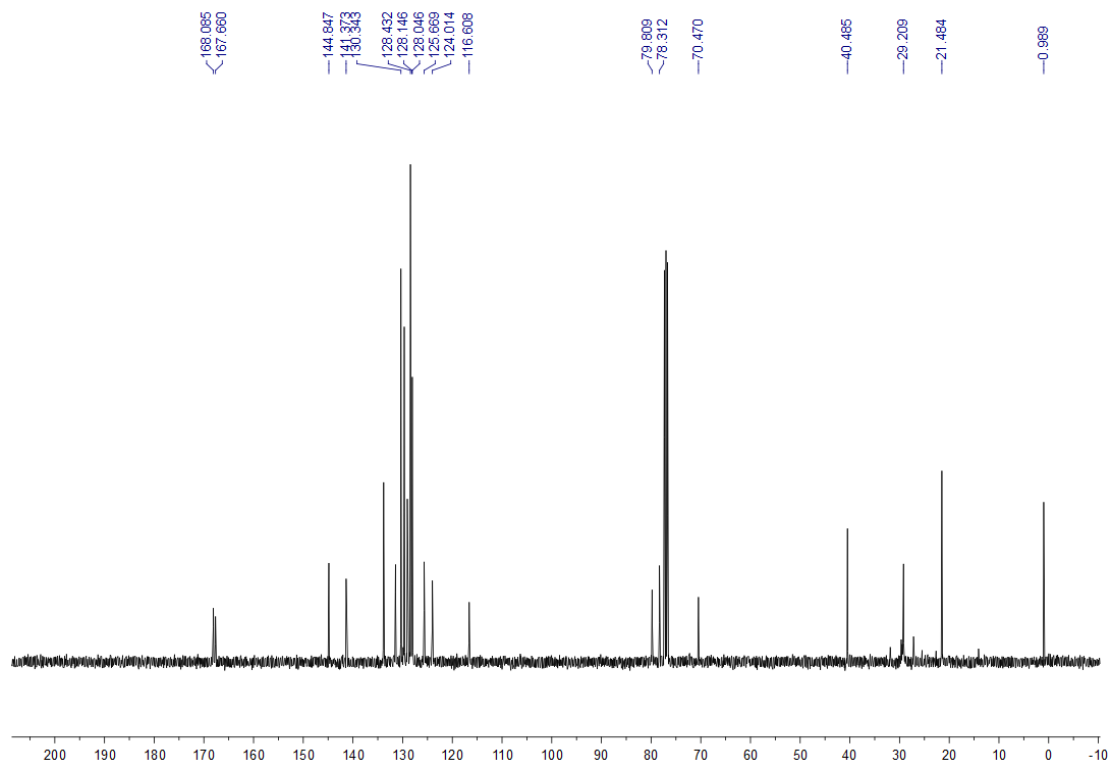

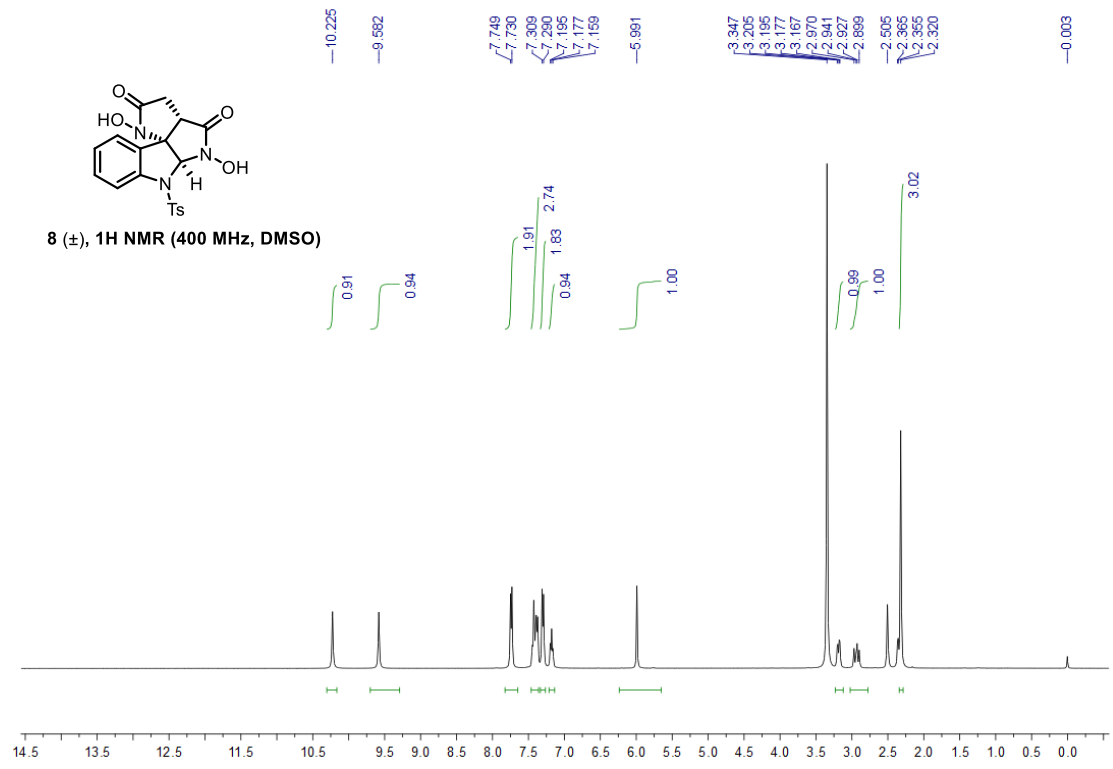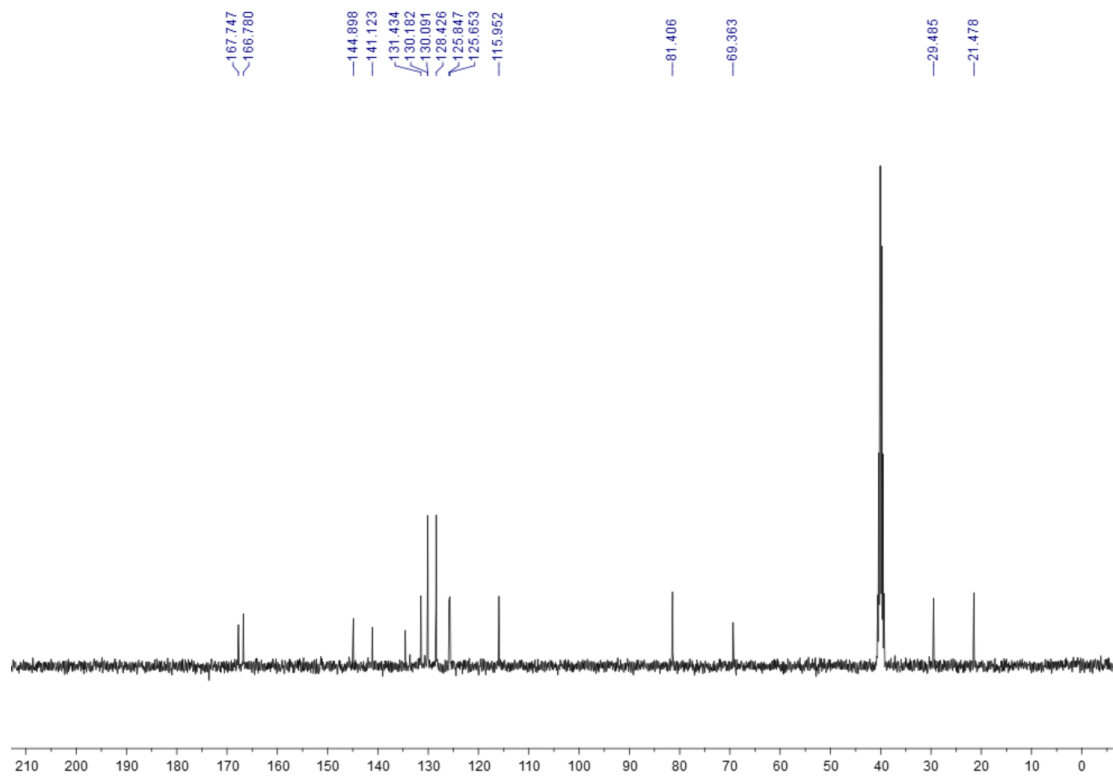

Figure S1, X-ray crystal structure of 4a (The crystal was obtained by slow evaporation of the solution of diethyl ether and hexane)

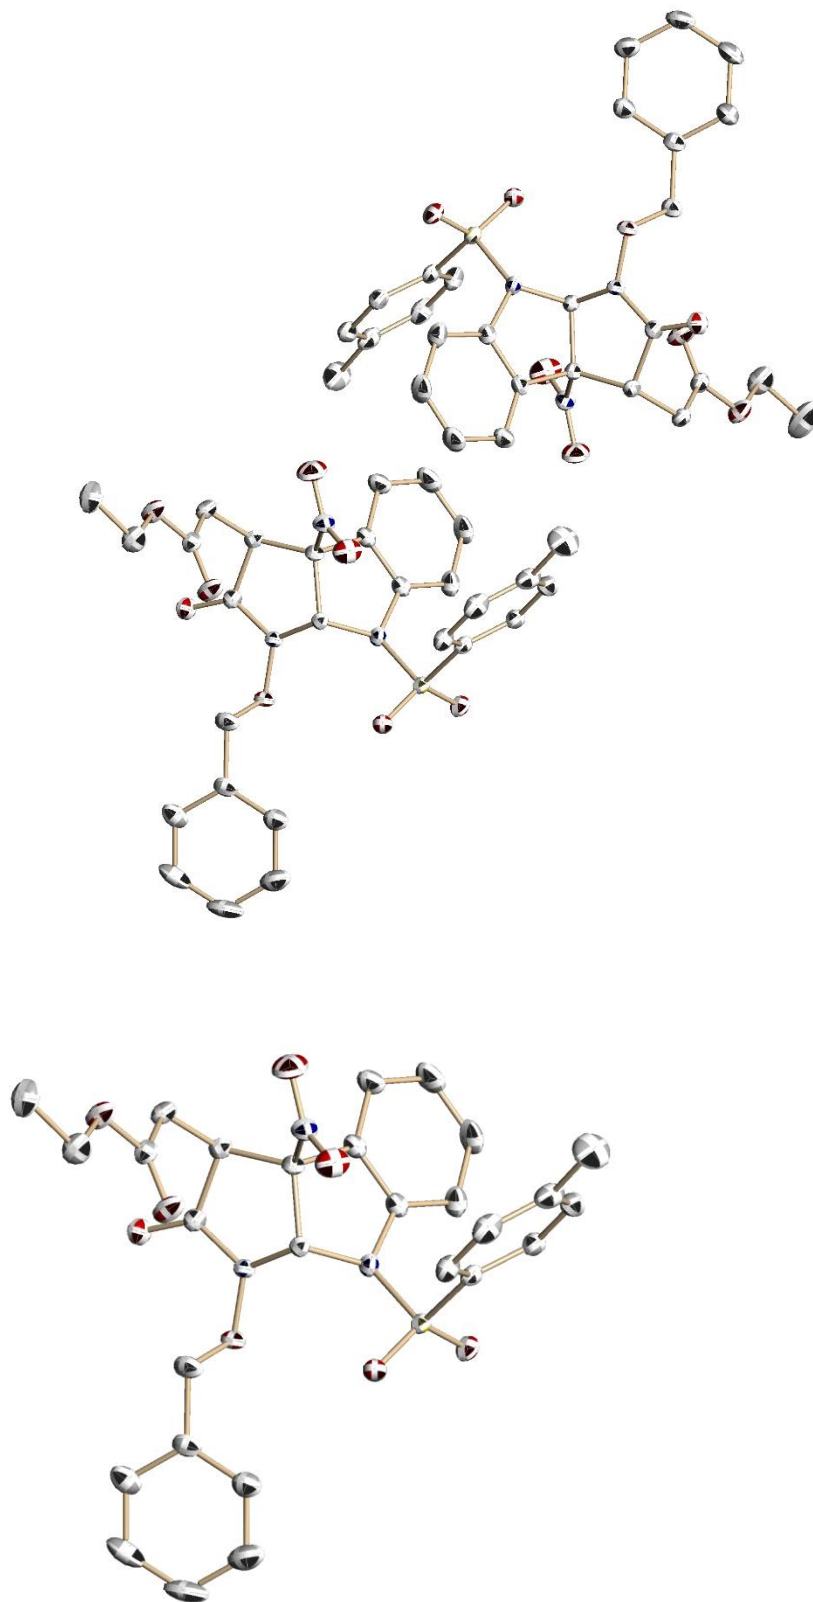

**Table S4 Crystal data and structure refinement for 4a.**

|                                     |                                                                                                           |
|-------------------------------------|-----------------------------------------------------------------------------------------------------------|
| Identification code                 | 20190529THZA                                                                                              |
| Chemical formula                    | C <sub>56</sub> H <sub>54</sub> N <sub>6</sub> O <sub>16</sub> S <sub>2</sub>                             |
| Formula weight                      | 1131.17 g/mol                                                                                             |
| Temperature                         | 197(2) K                                                                                                  |
| Wavelength                          | 1.54178 Å                                                                                                 |
| Crystal size                        | 0.140 x 0.170 x 0.190 mm                                                                                  |
| Crystal habit                       | clear light colourless block                                                                              |
| Crystal system                      | monoclinic                                                                                                |
| Space group                         | P 1 21/n 1                                                                                                |
| Unit cell dimensions                | a = 23.1540(14) Å      α = 90°<br>b = 10.2807(6) Å      β = 111.897(2)°<br>c = 24.2524(15) Å      γ = 90° |
| Volume                              | 5356.5(6) Å <sup>3</sup>                                                                                  |
| Z                                   | 4                                                                                                         |
| Density (calculated)                | 1.403 g/cm <sup>3</sup>                                                                                   |
| Absorption coefficient              | 1.562 mm <sup>-1</sup>                                                                                    |
| F(000)                              | 2368                                                                                                      |
|                                     |                                                                                                           |
| Diffractometer                      | d8 venture                                                                                                |
| Theta range for data collection     | 2.25 to 72.47°                                                                                            |
| Index ranges                        | -28 ≤ h ≤ 27, -12 ≤ k ≤ 9, -29 ≤ l ≤ 29                                                                   |
| Reflections collected               | 74191                                                                                                     |
| Independent reflections             | 10542 [R(int) = 0.0272]                                                                                   |
| Coverage of independent reflections | 99.1%                                                                                                     |
| Absorption correction               | Multi-Scan                                                                                                |
| Max. and min. transmission          | 0.8110 and 0.7560                                                                                         |
| Structure solution technique        | direct methods                                                                                            |
| Structure solution program          | SHELXT 2014/5 (Sheldrick, 2014)                                                                           |
| Refinement method                   | Full-matrix least-squares on F <sup>2</sup>                                                               |
| Refinement program                  | SHELXL-2018/3 (Sheldrick, 2018)                                                                           |
| Function minimized                  | Σ w(F <sub>o</sub> <sup>2</sup> - F <sub>c</sub> <sup>2</sup> ) <sup>2</sup>                              |
| Data / restraints / parameters      | 10542 / 0 / 725                                                                                           |
| Goodness-of-fit on F <sup>2</sup>   | 1.026                                                                                                     |
| Δ/σ <sub>max</sub>                  | 0.001                                                                                                     |
| Final R indices                     | 10234 data; I > 2σ(I) R <sub>1</sub> = 0.0326, wR <sub>2</sub> = 0.0870                                   |



|                             |          |                                                                 |
|-----------------------------|----------|-----------------------------------------------------------------|
|                             | all data | R1 = 0.0333, wR2 = 0.0878                                       |
| Weighting scheme            |          | $w=1/[\sigma^2(\text{Fo}^2)+(0.0445\text{P})^2+2.6342\text{P}]$ |
|                             |          | where $\text{P}=(\text{Fo}^2+2\text{Fc}^2)/3$                   |
| Largest diff. peak and hole |          | 0.348 and -0.423 eÅ <sup>-3</sup>                               |
| R.M.S. deviation from mean  |          | 0.043 eÅ <sup>-3</sup>                                          |

**Figure S2, X-ray crystal structure of 5a (The crystal was obtained by slow evaporation of the solution of diethyl ether and hexane)**

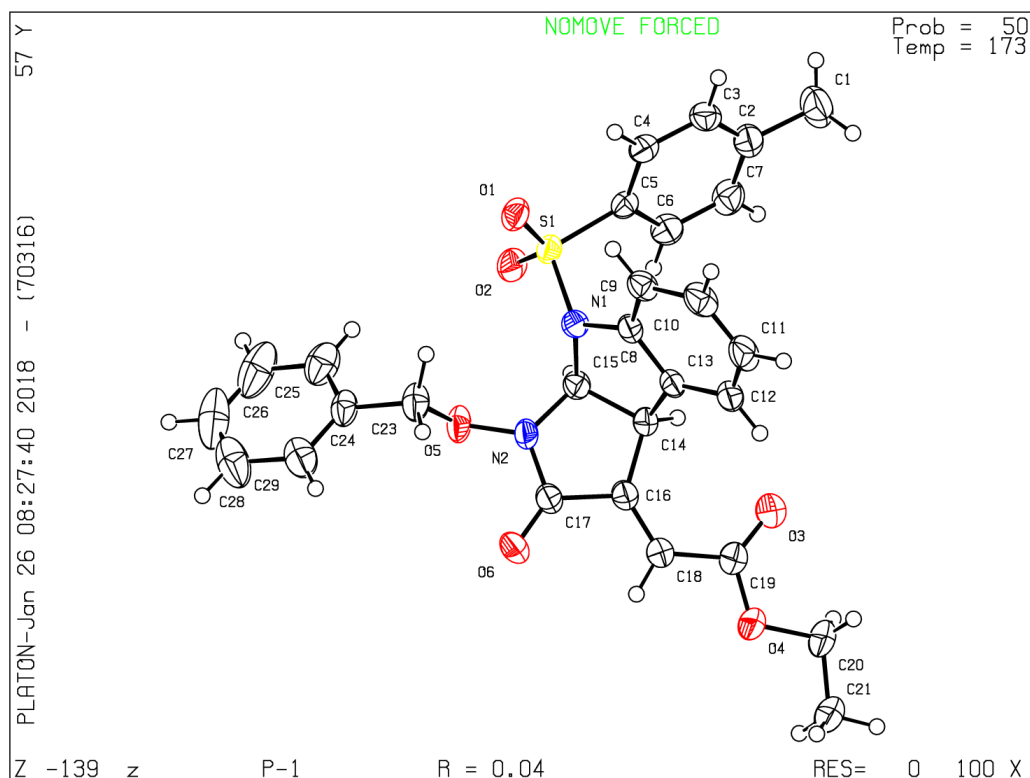

**Table S5 Crystal data and structure refinement for 5a.**

|                      |                                                                 |                                                                                         |
|----------------------|-----------------------------------------------------------------|-----------------------------------------------------------------------------------------|
| Identification code  | z                                                               |                                                                                         |
| Empirical formula    | C <sub>28</sub> H <sub>26</sub> N <sub>2</sub> O <sub>6</sub> S |                                                                                         |
| Formula weight       | 518.57                                                          |                                                                                         |
| Temperature          | 173(2) K                                                        |                                                                                         |
| Wavelength           | 1.54178 Å                                                       |                                                                                         |
| Crystal system       | Triclinic                                                       |                                                                                         |
| Space group          | P-1                                                             |                                                                                         |
| Unit cell dimensions | a = 10.2364(5) Å<br>b = 11.9238(6) Å<br>c = 11.9612(6) Å        | $\alpha = 107.241(2)^\circ$<br>$\beta = 105.874(2)^\circ$<br>$\gamma = 99.055(2)^\circ$ |
| Volume               | 1295.20(11) Å <sup>3</sup>                                      |                                                                                         |
| Z                    | 2                                                               |                                                                                         |
| Density (calculated) | 1.330 Mg/m <sup>3</sup>                                         |                                                                                         |

|                                   |                                             |
|-----------------------------------|---------------------------------------------|
| Absorption coefficient            | 1.494 mm <sup>-1</sup>                      |
| F(000)                            | 544                                         |
| Crystal size                      | 0.260 x 0.230 x 0.200 mm <sup>3</sup>       |
| Theta range for data collection   | 4.612 to 66.639°.                           |
| Index ranges                      | -12<=h<=12, -14<=k<=14, -14<=l<=14          |
| Reflections collected             | 16994                                       |
| Independent reflections           | 4526 [R(int) = 0.0233]                      |
| Completeness to theta = 66.639°   | 98.9 %                                      |
| Absorption correction             | Semi-empirical from equivalents             |
| Max. and min. transmission        | 0.728 and 0.656                             |
| Refinement method                 | Full-matrix least-squares on F <sup>2</sup> |
| Data / restraints / parameters    | 4526 / 0 / 337                              |
| Goodness-of-fit on F <sup>2</sup> | 1.045                                       |

**Figure S3, X-ray crystal structure of 6a (The crystal was obtained by slow evaporation of the solution of dichloromethane)**

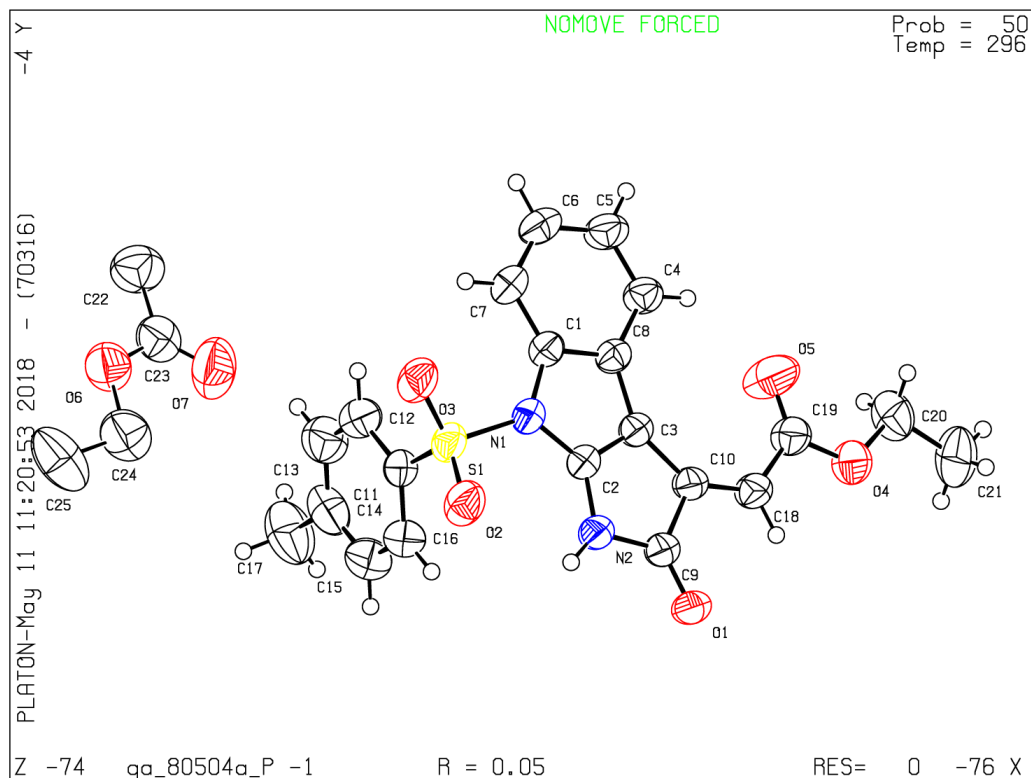

**Table S6 Crystal data and structure refinement for 6a.**

|                     |                                                                 |
|---------------------|-----------------------------------------------------------------|
| Identification code | ga_80504a_a                                                     |
| Empirical formula   | C <sub>23</sub> H <sub>22</sub> N <sub>2</sub> O <sub>6</sub> S |
| Formula weight      | 454.48                                                          |
| Temperature         | 296(2) K                                                        |
| Wavelength          | 1.34138 Å                                                       |

|                                   |                                             |                   |
|-----------------------------------|---------------------------------------------|-------------------|
| Crystal system                    | Triclinic                                   |                   |
| Space group                       | P-1                                         |                   |
| Unit cell dimensions              | a = 9.9808(13) Å                            | a = 105.673(13)°. |
|                                   | b = 10.3586(15) Å                           | b = 95.539(11)°.  |
|                                   | c = 11.4372(19) Å                           | g = 102.695(12)°. |
| Volume                            | 1095.3(3) Å <sup>3</sup>                    |                   |
| Z                                 | 2                                           |                   |
| Density (calculated)              | 1.378 Mg/m <sup>3</sup>                     |                   |
| Absorption coefficient            | 1.096 mm <sup>-1</sup>                      |                   |
| F(000)                            | 476                                         |                   |
| Crystal size                      | 0.260 x 0.150 x 0.140 mm <sup>3</sup>       |                   |
| Theta range for data collection   | 3.541 to 60.667°.                           |                   |
| Index ranges                      | -12<=h<=12, -13<=k<=13, -14<=l<=14          |                   |
| Reflections collected             | 14321                                       |                   |
| Independent reflections           | 5012 [R(int) = 0.0270]                      |                   |
| Completeness to theta = 53.594°   | 99.7 %                                      |                   |
| Absorption correction             | Semi-empirical from equivalents             |                   |
| Max. and min. transmission        | 0.902 and 0.788                             |                   |
| Refinement method                 | Full-matrix least-squares on F <sup>2</sup> |                   |
| Data / restraints / parameters    | 5012 / 36 / 323                             |                   |
| Goodness-of-fit on F <sup>2</sup> | 1.096                                       |                   |
| Final R indices [I>2sigma(I)]     | R1 = 0.0496, wR2 = 0.1462                   |                   |
| R indices (all data)              | R1 = 0.0586, wR2 = 0.1572                   |                   |
| Extinction coefficient            | 0.018(2)                                    |                   |
| Largest diff. peak and hole       | 0.426 and -0.280 e.Å <sup>-3</sup>          |                   |

### Theoretical calculation of atomic charges

The molecular geometric structures were optimized at B3LYP/6-311g(d,p) level of theory. Harmonic vibration frequency calculations at the same level were performed to verify all stationary points as local minima (with no imaginary frequency).

The natural bonding orbital (NBO) calculations were performed at the B3LYP method with 6-311g(d,p) basis set.

#### Compound 4a

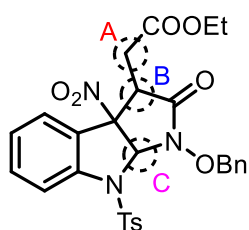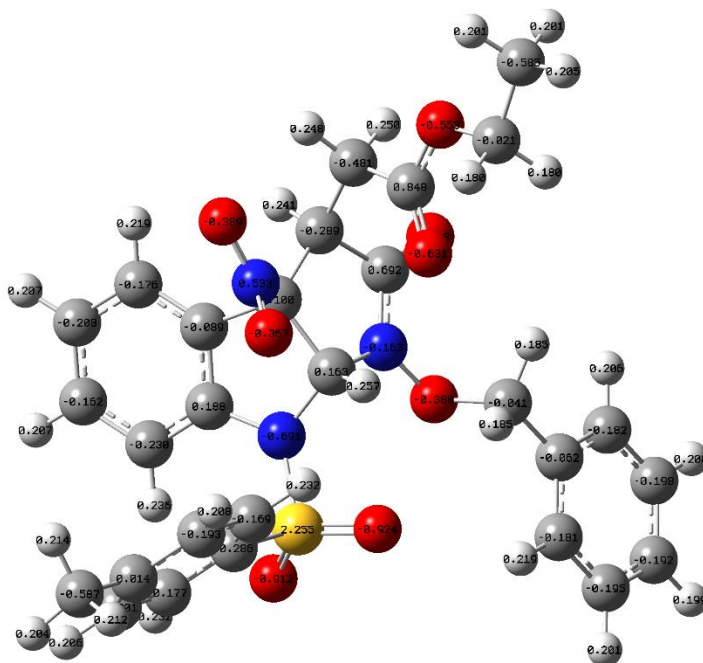

Intermediate I

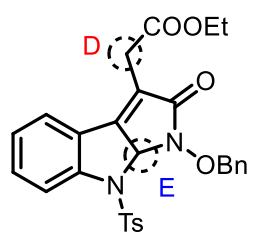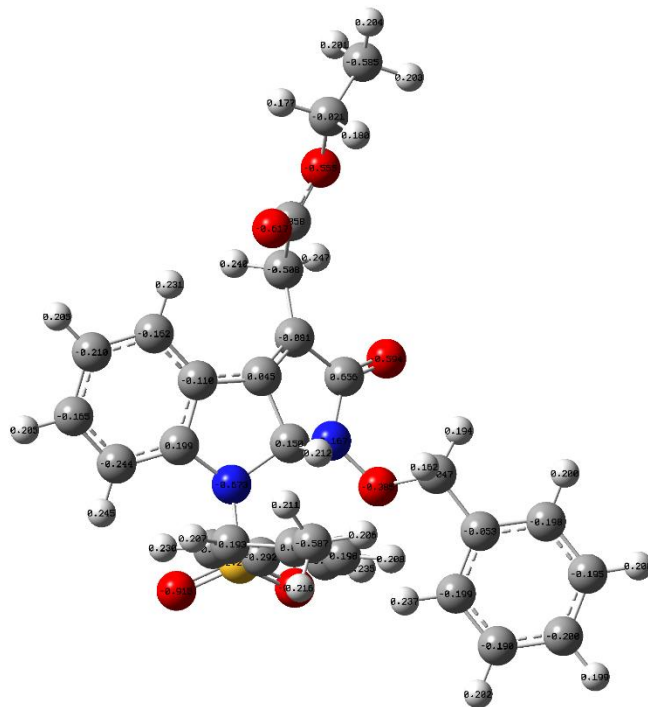

Supplement: d2ob00296e1.pdf [file d2ob00296e1.pdf]
